# Supplementary material for: Intermolecular resonance energy transfer between two lutein pigments in light-harvesting complex II studied by frenkel exciton models
Source: Royal Society of Chemistry journal article supplement (doi:10.1039/d3cp03092j), 2023-01-01
Supplement: d3cp03092j1.pdf [file d3cp03092j1.pdf]

**Supporting Information for:**

**Intermolecular Resonance Energy Transfer between Two Lutein Pigments in Light-**

**Harvesting Complex II studied by Frenkel exciton models**

Jiarui Li <sup>a</sup>, Tao Zeng <sup>b</sup>, Yu Zhai <sup>a</sup>, Zexing Qu <sup>a\*</sup>, Hui Li <sup>a\*</sup>

<sup>a</sup> *Institute of Theoretical Chemistry, College of Chemistry, Jilin University, 2519 Jiefang Road, Changchun, 130023, China*

<sup>b</sup> *Department of Chemistry, York University, 4700 Keele Street, Toronto, Ontario M3J 1P3, Canada*

## Contents

|                                                                                     |    |
|-------------------------------------------------------------------------------------|----|
| 1. The distance between two LUTs in the conformations sampled. ....                 | 3  |
| 2. Test results of cam-B3LYP/6-31+G(d) method. ....                                 | 3  |
| 3. The influence of environmental components on the excitation energy of LUTs. .... | 8  |
| 4. An ensemble-averaged Hamiltonian.....                                            | 11 |
| 5. Hypothesis test results of Gaussian distribution. ....                           | 11 |
| 6. Correlation test result.....                                                     | 11 |
| 7. The self-consistent convergent charge is used in this paper.....                 | 12 |

1. The distance between two LUTs in the conformations sampled.

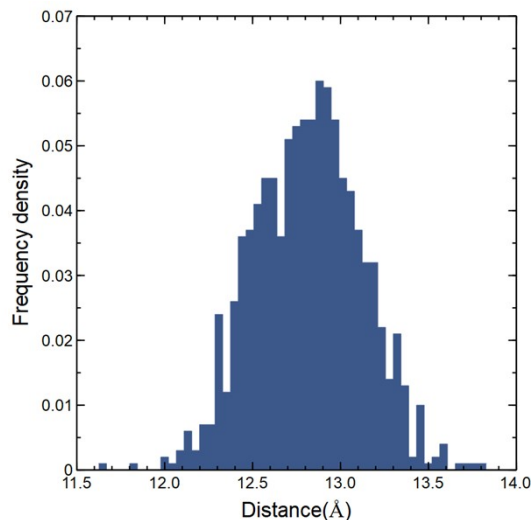

Figure S1. The distance between the C15 (middle carbon of the long chain) of two LUTs.

2. Test results of cam-B3LYP/6-31+G(d) method.

Table S1: The results in the three columns are the excitation energies of the two LUTs in the gas phase, the excitation energies of the two LUTs in a self-consistent converged charge environment, and the excitation energy shifts of the two LUTs caused by the environments. The excitation energies and self-consistent convergent charges here were all calculated by the cam-B3LYP/6-31+G(d) method. (Unit: eV).

|                  | $E_{pigment}^0$ | $E_{pigment}^{env}$ | $\Delta E_{pigment}^{env}$ |
|------------------|-----------------|---------------------|----------------------------|
| $E_{LUT1}^{S_2}$ | 2.8722          | 2.8435              | -0.0287                    |
| $E_{LUT2}^{S_2}$ | 2.8894          | 2.7668              | -0.1226                    |

Table S2: The wavelength of the  $S_2$  state of the two LUTs which are measured by different methods. Unit: eV(nm).

|                  | 2DES        | TD/B3LYP<br>with B3LYP<br>charges | TD/B3LYP<br>with cam-B3LYP<br>charges | TD/cam-B3LYP<br>with cam-B3LYP<br>charges |
|------------------|-------------|-----------------------------------|---------------------------------------|-------------------------------------------|
| $E_{LUT1}^{S_2}$ | 2.5047(495) | 2.3871(519)                       | 2.4227(511)                           | 2.8435(436)                               |
| $E_{LUT2}^{S_2}$ | 2.4311(510) | 2.3454(528)                       | 2.2694(546)                           | 2.7668(448)                               |

Table S3: Comparison of the electrostatic potential of residue from two functional optimizations.

| Residue name | Residue ID | cam-B3LYP | B3LYP     |
|--------------|------------|-----------|-----------|
| TYR          | 24         | 0.035779  | 0.021664  |
| LEU          | 25         | -0.073615 | -0.05913  |
| SER          | 32         | -0.251675 | -0.106098 |
| PRO          | 33         | 0.224581  | 0.084155  |
| TYR          | 35         | -0.256062 | -0.087221 |
| LEU          | 36         | 0.124823  | 0.072986  |
| GLY          | 42         | -0.28322  | -0.053833 |
| ASH          | 43         | 0.04961   | 0.037177  |
| TYR          | 44         | -0.11761  | -0.176728 |
| GLY          | 45         | 0.621472  | 0.06952   |
| TRP          | 46         | -0.146356 | 0.19958   |
| ASH          | 47         | -0.093335 | -0.119712 |

---

|     |    |           |           |
|-----|----|-----------|-----------|
| THR | 48 | -0.144324 | -0.090865 |
| ALA | 49 | -0.10375  | -0.109109 |
| GLY | 50 | 0.012068  | 0.011607  |
| LEU | 51 | -0.078772 | -0.082836 |
| SER | 52 | -0.100805 | -0.046958 |
| ALA | 53 | -0.023244 | 0.054943  |
| THR | 57 | -0.171319 | 0.039538  |
| PHE | 58 | -0.420184 | -0.00926  |
| ASN | 61 | 0.23232   | -0.019651 |
| ARG | 62 | -0.113705 | -0.030654 |
| GLU | 63 | -0.053875 | -0.073625 |
| LEU | 64 | 0.466088  | 0.24769   |
| GLU | 65 | -0.66357  | -0.4376   |
| VAL | 66 | -0.226976 | -0.239721 |
| ILE | 67 | 0.01711   | -0.0144   |
| HIS | 68 | -0.08795  | -0.092025 |
| CYS | 69 | 0.023792  | -0.061813 |
| ARG | 70 | 0.160836  | 0.041557  |
| TRP | 71 | 0.046838  | 0.012677  |
| ALA | 72 | 0.00083   | 0.010718  |
| MET | 73 | -0.031962 | -0.045657 |
| LEU | 74 | 0.000553  | -0.02365  |
| GLY | 75 | -0.1528   | -0.145121 |

---

---

|     |     |           |           |
|-----|-----|-----------|-----------|
| ALA | 76  | 0.076789  | 0.028462  |
| LEU | 77  | -0.048777 | -0.048131 |
| GLY | 78  | -0.049732 | -0.051581 |
| CYS | 79  | -0.034087 | -0.044959 |
| VAL | 80  | 0.147338  | 0.060395  |
| PHE | 81  | -0.235424 | -0.21842  |
| PRO | 82  | 0.061161  | 0.023773  |
| GLU | 83  | -0.040645 | 0.048596  |
| LEU | 84  | 0.017413  | -0.059702 |
| PHE | 92  | -0.433666 | 1E-06     |
| GLU | 94  | 0.109061  | -0.053889 |
| ALA | 95  | 0.013553  | 0.003066  |
| VAL | 96  | -0.062319 | -0.116286 |
| TRP | 97  | 0.148393  | 0.093451  |
| PHE | 98  | -0.168968 | -0.20396  |
| LYS | 99  | 0.165187  | 0.022106  |
| ALA | 100 | 0.010297  | -0.006569 |
| GLY | 101 | 0.000276  | -0.036344 |
| SER | 102 | -0.107181 | -0.101068 |
| GLN | 103 | 0.145352  | 0.137282  |
| ILE | 104 | -0.280292 | -0.095764 |
| LEU | 110 | -0.178743 | -1E-06    |
| TYR | 112 | -0.04062  | 1E-06     |

---

---

|     |     |           |           |
|-----|-----|-----------|-----------|
| ILE | 124 | -0.401859 | 0         |
| ILE | 127 | -0.121384 | -1E-06    |
| GLN | 131 | -0.249014 | 0         |
| MET | 135 | 0.035639  | -1E-06    |
| ILE | 181 | -0.469003 | -1E-06    |
| ASN | 183 | -0.119831 | -0.126035 |
| GLY | 184 | 0.173557  | -0.132751 |
| ARG | 185 | 0.065316  | 0.167206  |
| LEU | 186 | 0.007992  | -0.01876  |
| ALA | 187 | 0.112425  | 0.082534  |
| MET | 188 | -0.127142 | -0.143371 |
| PHE | 189 | 0.006847  | -0.028107 |
| SER | 190 | -0.0799   | -0.068025 |
| MET | 191 | -0.022008 | -0.052259 |
| PHE | 192 | 0.007167  | -0.035287 |
| GLY | 193 | -0.184984 | -0.139925 |
| PHE | 194 | 0.079048  | 0.01979   |
| PHE | 195 | -0.078083 | 0.004322  |
| VAL | 196 | -0.30553  | -0.033342 |
| ALA | 198 | -0.197097 | -2E-06    |
| GLY | 204 | 0.537879  | -0.12708  |
| PRO | 205 | 0.130684  | -0.042544 |

---

3. The influence of environmental components on the excitation energy of LUTs.

Table S4 : The excitation energy of LUTs when not considering the ESP charges of each pigment. The difference value refers to the deviation from the excitation energy under the self-consistent convergent charge mentioned in the main text Table 1. (Unit =eV).

|                | $E_{LUT1}^{S_2}$ | Energy shift<br>( $\Delta E_{LUT1}^{S_2}$ ) | $E_{LUT2}^{S_2}$ | Energy shift<br>( $\Delta E_{LUT2}^{S_2}$ ) | Gap shift<br>( $\Delta E_{LUT1-}^{S_2}$<br>$\Delta E_{LUT2}^{S_2}$ ) |
|----------------|------------------|---------------------------------------------|------------------|---------------------------------------------|----------------------------------------------------------------------|
| ESP(LUT1) =0   | 2.3895           | 0                                           | 2.3990           | -0.0478                                     | 0.0478                                                               |
| ESP(LUT2) =0   | 2.4200           | -0.0305                                     | 2.3512           | 0                                           | -0.0305                                                              |
| ESP(CLA602) =0 | 2.3825           | 0.07                                        | 2.3941           | -0.0429                                     | 0.0499                                                               |
| ESP(CLA603) =0 | 2.3848           | 0.0047                                      | 2.3309           | 0.0203                                      | -0.0156                                                              |
| ESP(CLA604) =0 | 2.3888           | 0.0007                                      | 2.3636           | -0.0124                                     | 0.0131                                                               |
| ESP(CLA610) =0 | 2.3971           | -0.0076                                     | 2.3391           | 0.0121                                      | -0.0197                                                              |
| ESP(CLA611) =0 | 2.3682           | 0.0213                                      | 2.3508           | 0.0004                                      | 0.0209                                                               |
| ESP(CLA612) =0 | 2.3975           | -0.008                                      | 2.3363           | 0.0149                                      | -0.0229                                                              |
| ESP(CLA613) =0 | 2.3872           | 0.023                                       | 2.3469           | 0.0043                                      | -0.002                                                               |

Table S5 : The excitation energy of LUTs when not considering the ESP charges of each residue.

The difference value refers to the deviation from the excitation energy under the self-consistent convergent charge mentioned in the main text Table 1. The form of the first column of the table, i.e. ESP (residue name, residue ID). (Unit =eV).



|                | $E_{LUT1}^{S_2}$ | Energy shift<br>( $\Delta E_{LUT1}^{S_2}$ ) | $E_{LUT2}^{S_2}$ | Energy shift<br>( $\Delta E_{LUT2}^{S_2}$ ) | Gap shift<br>( $\Delta E_{LUT1}^{S_2}$ -<br>$\Delta E_{LUT2}^{S_2}$ ) |
|----------------|------------------|---------------------------------------------|------------------|---------------------------------------------|-----------------------------------------------------------------------|
| ESP(TRP,46) =0 | 2.3855           | 0.004                                       | 2.3759           | -0.0247                                     | 0.0287                                                                |
| ESP(ASH,47) =0 | 2.3899           | -0.0004                                     | 2.3312           | 0.02                                        | -0.0204                                                               |
| ESP(THR,48) =0 | 2.3895           | 0                                           | 2.3297           | 0.0215                                      | -0.0215                                                               |
| ESP(ALA,49) =0 | 2.3904           | -0.0009                                     | 2.3385           | 0.0127                                      | -0.0136                                                               |
| ESP(GLY,50) =0 | 2.3887           | 0.0008                                      | 2.3628           | -0.0116                                     | 0.0124                                                                |
| ESP(LEU,51) =0 | 2.3892           | 0.0003                                      | 2.3397           | 0.0115                                      | -0.0112                                                               |
| ESP(HIS,68) =0 | 2.38             | 0.0095                                      | 2.4046           | -0.0534                                     | 0.0629                                                                |
| ESP(CYS,69) =0 | 2.3968           | -0.0073                                     | 2.3637           | -0.0125                                     | 0.0052                                                                |
| ESP(TRP,71) =0 | 2.3882           | 0.0013                                      | 2.4375           | -0.0863                                     | 0.0876                                                                |
| ESP(ALA,72) =0 | 2.4181           | -0.0286                                     | 2.3844           | -0.0332                                     | 0.0046                                                                |
| ESP(MET,73) =0 | 2.395            | -0.0055                                     | 2.3685           | -0.0173                                     | 0.0118                                                                |
| ESP(LEU,74) =0 | 2.4035           | -0.014                                      | 2.3857           | -0.0345                                     | 0.0205                                                                |
| ESP(ALA,76) =0 | 2.4013           | -0.0118                                     | 2.3498           | 0.0014                                      | -0.0132                                                               |
| ESP(LEU,77) =0 | 2.419            | -0.0295                                     | 2.3609           | -0.0097                                     | -0.0198                                                               |
| ESP(GLY,78) =0 | 2.3952           | -0.0057                                     | 2.3464           | 0.0048                                      | -0.0105                                                               |
| ESP(CYS,79) =0 | 2.3952           | -0.0057                                     | 2.3515           | -0.0003                                     | -0.0054                                                               |
| ESP(PRO,82) =0 | 2.3802           | 0.0093                                      | 2.304            | 0.0472                                      | -0.0379                                                               |
| ESP(VAL,96) =0 | 2.3894           | 1E-04                                       | 2.3772           | -0.026                                      | 0.0261                                                                |
| ESP(TRP,97) =0 | 2.3779           | 0.0116                                      | 2.3322           | 0.019                                       | -0.0074                                                               |

|                 |        |         |        |         |         |
|-----------------|--------|---------|--------|---------|---------|
| ESP(PHE,98) =0  | 2.3949 | -0.0054 | 2.3798 | -0.0286 | 0.0232  |
| ESP(ALA,100) =0 | 2.385  | 0.0045  | 2.3292 | 0.022   | -0.0175 |
| ESP(GLY,101) =0 | 2.3859 | 0.0036  | 2.3328 | 0.0184  | -0.0148 |
| ESP(PHE,161) =0 | 2.3788 | 0.0107  | 2.3511 | 1E-04   | 0.0106  |
| ESP(ASH,162) =0 | 2.3482 | 0.0413  | 2.3538 | -0.0026 | 0.0439  |
| ESP(PRO,163) =0 | 2.4187 | -0.0292 | 2.3465 | 0.0047  | -0.0339 |
| ESP(LEU,164) =0 | 2.3583 | 0.0312  | 2.3535 | -0.0023 | 0.0335  |
| ESP(GLY,165) =0 | 2.401  | -0.0115 | 2.3494 | 0.0018  | -0.0133 |
| ESP(LEU,166) =0 | 2.3849 | 0.0046  | 2.3501 | 0.0011  | 0.0035  |
| ESP(ASN,183) =0 | 2.4076 | -0.0181 | 2.3561 | -0.0049 | -0.0132 |
| ESP(GLY,184) =0 | 2.4158 | -0.0263 | 2.3444 | 0.0068  | -0.0331 |
| ESP(LEU,186) =0 | 2.4349 | -0.0454 | 2.3447 | 0.0065  | -0.0519 |
| ESP(ALA,187) =0 | 2.4105 | -0.021  | 2.3724 | -0.0212 | 0.0002  |
| ESP(MET,188) =0 | 2.4184 | -0.0289 | 2.3214 | 0.0298  | -0.0587 |
| ESP(PHE,189) =0 | 2.391  | -0.0015 | 2.3616 | -0.0104 | 0.0089  |
| ESP(SER,190) =0 | 2.4053 | -0.0158 | 2.3588 | -0.0076 | -0.0082 |
| ESP(MET,191) =0 | 2.4014 | -0.0119 | 2.4033 | -0.0521 | 0.0402  |
| ESP(PHE,192) =0 | 2.3838 | 0.0057  | 2.3769 | -0.0257 | 0.0314  |
| ESP(GLY,193) =0 | 2.383  | 0.0065  | 2.3597 | -0.0085 | 0.015   |
| ESP(PHE,194) =0 | 2.4189 | -0.0294 | 2.3522 | -0.001  | -0.0284 |
| ESP(PHE,195) =0 | 2.3891 | 0.0004  | 2.3805 | -0.0293 | 0.0297  |
| ESP(GLN,197) =0 | 2.3877 | 0.0018  | 2.3372 | 0.014   | -0.0122 |
| ESP(PRO,205) =0 | 2.3559 | 0.0336  | 2.331  | 0.0202  | 0.0134  |

|                 |        |         |        |        |         |
|-----------------|--------|---------|--------|--------|---------|
| ESP(LEU,206) =0 | 2.3973 | -0.0078 | 2.3501 | 0.0011 | -0.0089 |
| ESP(ASN,208) =0 | 2.3873 | 0.0022  | 2.348  | 0.0032 | -0.001  |
| ESP(LEU,209) =0 | 2.3743 | 0.0152  | 2.346  | 0.0052 | 0.01    |

#### 4. An ensemble-averaged Hamiltonian.

Table S6: The diagonal terms are the ensemble-averaged excitation energies of the two LUTs and the off-diagonal terms are the ensemble-averaged electronic coupling values. (unit: eV).

|                    | $S_2(\text{LUT1})$ | $S_2(\text{LUT2})$ |
|--------------------|--------------------|--------------------|
| $S_2(\text{LUT1})$ | 2.35949            | 0.00505            |
| $S_2(\text{LUT2})$ | 0.00505            | 2.35641            |

#### 5. Hypothesis test results of Gaussian distribution.

In the text, the stochastic exciton Hamiltonian models can be described as

$$\begin{pmatrix} H_{LUT1} & H_{LUT1LUT2} \\ H_{LUT2LUT1} & H_{LUT2} \end{pmatrix},$$

Table S7. Kolmogorov-Smirnov (K-S) constructive testing results of matrix elements of stochastic exciton Hamiltonian models.

|          | $H_{LUT1}$ | $H_{LUT2}$ | $H_{LUT1LUT2}(H_{LUT2LUT1})$ | $\Delta H (H_{LUT1} - H_{LUT2})$ |
|----------|------------|------------|------------------------------|----------------------------------|
| p-values | 0.33025    | 1          | 0.8499                       | 1                                |

#### 6. Correlation test result.

Table S8. Pearson correlation coefficients test result.

|                         | $H_{LUT1-}$ | $H_{LUT1-}$    | $H_{LUT2-}$    | $H_{LUT1LUT2-}$ |
|-------------------------|-------------|----------------|----------------|-----------------|
|                         | $H_{LUT2}$  | $H_{LUT1LUT2}$ | $H_{LUT1LUT2}$ | $\Delta H$      |
| correlation coefficient | 0.00408,    | -0.16356       | -0.07463       | -0.06122        |

7. The self-consistent convergent charge is used in this paper.

Table S9. Electrostatic potential (ESP) charges of atoms within the 10 Å - radius of LUT1 and LUT2.

| Atom | ESP charge | x     | y      | z     | PDB name | Residue name | Residue ID |
|------|------------|-------|--------|-------|----------|--------------|------------|
| N    | -0.567974  | 55.76 | 104.25 | 21.89 | N        | TYR          | 24         |
| H    | 0.146942   | 55.56 | 104.75 | 22.74 | H1       | TYR          | 24         |
| H    | 0.174402   | 55.18 | 105.03 | 22.10 | H2       | TYR          | 24         |
| H    | 0.223493   | 56.31 | 104.02 | 22.69 | H3       | TYR          | 24         |
| C    | 0.220596   | 54.93 | 103.11 | 21.53 | CA       | TYR          | 24         |
| H    | 0.065051   | 55.64 | 102.43 | 21.34 | HA       | TYR          | 24         |
| C    | -0.313105  | 54.01 | 102.76 | 22.71 | CB       | TYR          | 24         |
| H    | 0.125978   | 54.50 | 102.94 | 23.56 | HB1      | TYR          | 24         |
| H    | 0.092625   | 53.78 | 101.79 | 22.66 | HB2      | TYR          | 24         |
| C    | 0.140305   | 52.70 | 103.53 | 22.76 | CG       | TYR          | 24         |
| C    | -0.273067  | 51.51 | 102.92 | 22.37 | CD1      | TYR          | 24         |
| H    | 0.150295   | 51.51 | 101.97 | 22.06 | HD1      | TYR          | 24         |
| C    | -0.259559  | 50.31 | 103.62 | 22.41 | CE1      | TYR          | 24         |
| H    | 0.159644   | 49.46 | 103.17 | 22.13 | HE1      | TYR          | 24         |
| C    | 0.364338   | 50.29 | 104.93 | 22.83 | CZ       | TYR          | 24         |
| O    | -0.586887  | 49.09 | 105.62 | 22.84 | OH       | TYR          | 24         |
| H    | 0.393927   | 49.24 | 106.55 | 23.17 | HH       | TYR          | 24         |
| C    | -0.436554  | 51.46 | 105.56 | 23.23 | CE2      | TYR          | 24         |
| H    | 0.184829   | 51.44 | 106.51 | 23.53 | HE2      | TYR          | 24         |
| C    | -0.130365  | 52.66 | 104.86 | 23.19 | CD2      | TYR          | 24         |
| H    | 0.112297   | 53.51 | 105.31 | 23.48 | HD2      | TYR          | 24         |
| C    | 0.728436   | 54.11 | 103.16 | 20.23 | C        | TYR          | 24         |
| O    | -0.693983  | 53.62 | 102.12 | 19.77 | O        | TYR          | 24         |
| N    | -1.032928  | 53.96 | 104.34 | 19.64 | N        | LEU          | 25         |
| H    | 0.443329   | 54.34 | 105.16 | 20.06 | H        | LEU          | 25         |
| C    | 0.878943   | 53.22 | 104.44 | 18.38 | CA       | LEU          | 25         |
| H    | -0.003418  | 52.86 | 103.53 | 18.19 | HA       | LEU          | 25         |
| C    | -0.420968  | 52.05 | 105.43 | 18.51 | CB       | LEU          | 25         |
| H    | 0.074444   | 51.67 | 105.58 | 17.59 | HB1      | LEU          | 25         |

|   |           |       |        |       |      |     |    |
|---|-----------|-------|--------|-------|------|-----|----|
| H | 0.105286  | 52.41 | 106.29 | 18.87 | HB2  | LEU | 25 |
| C | 0.446265  | 50.90 | 104.98 | 19.42 | CG   | LEU | 25 |
| H | -0.034121 | 51.23 | 104.89 | 20.36 | HG   | LEU | 25 |
| C | -0.431847 | 49.80 | 106.03 | 19.42 | CD1  | LEU | 25 |
| H | 0.101932  | 49.06 | 105.73 | 20.01 | 1HD1 | LEU | 25 |
| H | 0.079664  | 50.16 | 106.90 | 19.75 | 2HD1 | LEU | 25 |
| H | 0.119166  | 49.45 | 106.14 | 18.48 | 3HD1 | LEU | 25 |
| C | -0.369552 | 50.38 | 103.63 | 18.95 | CD2  | LEU | 25 |
| H | 0.073208  | 49.63 | 103.34 | 19.54 | 1HD2 | LEU | 25 |
| H | 0.068390  | 50.05 | 103.72 | 18.01 | 2HD2 | LEU | 25 |
| H | 0.111290  | 51.11 | 102.96 | 18.98 | 3HD2 | LEU | 25 |
| C | -0.039398 | 54.17 | 104.88 | 17.27 | C    | LEU | 25 |
| O | -0.228815 | 53.73 | 105.32 | 16.20 | O    | LEU | 25 |
| N | -0.688971 | 53.34 | 112.98 | 24.40 | N    | SER | 32 |
| H | 0.370367  | 54.22 | 113.45 | 24.27 | H    | SER | 32 |
| C | 0.558365  | 53.21 | 111.98 | 25.45 | CA   | SER | 32 |
| H | -0.117508 | 52.48 | 111.37 | 25.12 | HA   | SER | 32 |
| C | 0.095612  | 54.52 | 111.22 | 25.62 | CB   | SER | 32 |
| H | 0.046438  | 54.91 | 110.97 | 24.74 | HB1  | SER | 32 |
| H | -0.045407 | 54.38 | 110.38 | 26.16 | HB2  | SER | 32 |
| O | -0.630244 | 55.47 | 112.00 | 26.30 | OG   | SER | 32 |
| H | 0.424352  | 56.32 | 111.48 | 26.41 | HG   | SER | 32 |
| C | 0.253940  | 52.78 | 112.60 | 26.78 | C    | SER | 32 |
| O | -0.373042 | 52.92 | 113.80 | 26.98 | O    | SER | 32 |
| N | -0.095001 | 52.25 | 111.77 | 27.69 | N    | PRO | 33 |
| C | -0.105980 | 52.05 | 110.32 | 27.59 | CD   | PRO | 33 |
| H | 0.069575  | 52.91 | 109.83 | 27.75 | HD1  | PRO | 33 |
| H | 0.087382  | 51.68 | 110.07 | 26.69 | HD2  | PRO | 33 |
| C | -0.014691 | 51.05 | 110.06 | 28.68 | CG   | PRO | 33 |
| H | 0.015886  | 51.09 | 109.10 | 28.99 | HG1  | PRO | 33 |
| H | 0.050222  | 50.12 | 110.27 | 28.39 | HG2  | PRO | 33 |
| C | -0.098726 | 51.51 | 110.99 | 29.77 | CB   | PRO | 33 |
| H | 0.082939  | 52.33 | 110.63 | 30.22 | HB1  | PRO | 33 |
| H | 0.065103  | 50.79 | 111.13 | 30.44 | HB2  | PRO | 33 |
| C | 0.147238  | 51.81 | 112.27 | 29.00 | CA   | PRO | 33 |
| H | 0.077089  | 51.02 | 112.88 | 28.92 | HA   | PRO | 33 |
| C | 0.044093  | 52.90 | 113.11 | 29.67 | C    | PRO | 33 |
| O | -0.240974 | 54.08 | 112.78 | 29.60 | O    | PRO | 33 |
| N | -0.645471 | 53.50 | 113.41 | 32.73 | N    | TYR | 35 |
| H | 0.316795  | 52.59 | 113.15 | 32.41 | H    | TYR | 35 |
| C | 0.477837  | 54.10 | 112.71 | 33.86 | CA   | TYR | 35 |
| H | -0.012631 | 54.69 | 113.41 | 34.28 | HA   | TYR | 35 |
| C | -0.402058 | 53.01 | 112.27 | 34.84 | CB   | TYR | 35 |
| H | 0.164142  | 52.57 | 113.09 | 35.21 | HB1  | TYR | 35 |
| H | 0.083742  | 53.44 | 111.76 | 35.58 | HB2  | TYR | 35 |
| C | 0.317875  | 51.93 | 111.40 | 34.24 | CG   | TYR | 35 |

|   |           |       |        |       |      |     |    |
|---|-----------|-------|--------|-------|------|-----|----|
| C | -0.294714 | 52.12 | 110.02 | 34.10 | CD1  | TYR | 35 |
| H | 0.160288  | 52.99 | 109.62 | 34.37 | HD1  | TYR | 35 |
| C | -0.188323 | 51.11 | 109.21 | 33.59 | CE1  | TYR | 35 |
| H | 0.152734  | 51.26 | 108.23 | 33.49 | HE1  | TYR | 35 |
| C | 0.312764  | 49.90 | 109.77 | 33.21 | CZ   | TYR | 35 |
| O | -0.560460 | 48.91 | 108.95 | 32.71 | OH   | TYR | 35 |
| H | 0.392952  | 48.11 | 109.50 | 32.48 | HH   | TYR | 35 |
| C | -0.313962 | 49.69 | 111.13 | 33.34 | CE2  | TYR | 35 |
| H | 0.181504  | 48.81 | 111.53 | 33.06 | HE2  | TYR | 35 |
| C | -0.280785 | 50.70 | 111.94 | 33.85 | CD2  | TYR | 35 |
| H | 0.202614  | 50.55 | 112.93 | 33.94 | HD2  | TYR | 35 |
| C | 0.329212  | 55.02 | 111.55 | 33.46 | C    | TYR | 35 |
| O | -0.481276 | 55.67 | 110.94 | 34.31 | O    | TYR | 35 |
| N | -0.439157 | 55.07 | 111.24 | 32.16 | N    | LEU | 36 |
| H | 0.336097  | 54.49 | 111.74 | 31.52 | H    | LEU | 36 |
| C | 0.781920  | 55.96 | 110.20 | 31.66 | CA   | LEU | 36 |
| H | -0.120537 | 56.27 | 109.62 | 32.41 | HA   | LEU | 36 |
| C | -0.732006 | 55.25 | 109.29 | 30.65 | CB   | LEU | 36 |
| H | 0.148084  | 55.94 | 108.71 | 30.22 | HB1  | LEU | 36 |
| H | 0.163786  | 54.83 | 109.87 | 29.96 | HB2  | LEU | 36 |
| C | 0.651211  | 54.15 | 108.36 | 31.19 | CG   | LEU | 36 |
| H | -0.130359 | 53.37 | 108.90 | 31.50 | HG   | LEU | 36 |
| C | -0.350999 | 53.69 | 107.43 | 30.08 | CD1  | LEU | 36 |
| H | 0.055687  | 52.98 | 106.82 | 30.42 | 1HD1 | LEU | 36 |
| H | 0.043944  | 53.33 | 107.97 | 29.32 | 2HD1 | LEU | 36 |
| H | 0.089778  | 54.47 | 106.88 | 29.76 | 3HD1 | LEU | 36 |
| C | -0.435593 | 54.69 | 107.56 | 32.37 | CD2  | LEU | 36 |
| H | 0.071655  | 53.97 | 106.96 | 32.72 | 1HD2 | LEU | 36 |
| H | 0.110236  | 55.47 | 107.01 | 32.08 | 2HD2 | LEU | 36 |
| H | 0.128425  | 54.98 | 108.19 | 33.10 | 3HD2 | LEU | 36 |
| C | -0.108137 | 57.08 | 110.97 | 30.97 | C    | LEU | 36 |
| O | -0.191049 | 57.04 | 111.23 | 29.77 | O    | LEU | 36 |
| N | -0.685797 | 61.59 | 101.39 | 30.19 | N    | GLY | 42 |
| H | 0.384680  | 62.42 | 101.58 | 29.66 | H    | GLY | 42 |
| C | 0.550812  | 60.38 | 100.96 | 29.49 | CA   | GLY | 42 |
| H | -0.070294 | 59.94 | 100.27 | 30.06 | HA1  | GLY | 42 |
| H | -0.082378 | 60.68 | 100.55 | 28.63 | HA2  | GLY | 42 |
| C | 0.414238  | 59.39 | 102.06 | 29.19 | C    | GLY | 42 |
| O | -0.565094 | 58.29 | 101.80 | 28.69 | O    | GLY | 42 |
| N | -0.390408 | 59.76 | 103.29 | 29.51 | N    | ASH | 43 |
| H | 0.279969  | 60.66 | 103.45 | 29.92 | H    | ASH | 43 |
| C | 0.087041  | 58.88 | 104.42 | 29.27 | CA   | ASH | 43 |
| H | 0.125088  | 57.99 | 104.14 | 29.63 | HA   | ASH | 43 |
| C | -0.256542 | 59.41 | 105.65 | 30.00 | CB   | ASH | 43 |
| H | 0.125069  | 60.28 | 105.92 | 29.59 | HB1  | ASH | 43 |
| H | 0.092421  | 59.55 | 105.41 | 30.96 | HB2  | ASH | 43 |

|   |           |       |        |       |     |     |    |
|---|-----------|-------|--------|-------|-----|-----|----|
| C | 0.742512  | 58.45 | 106.83 | 29.94 | CG  | ASH | 43 |
| O | -0.627996 | 57.70 | 106.96 | 28.95 | OD1 | ASH | 43 |
| O | -0.541534 | 58.47 | 107.65 | 30.88 | OD2 | ASH | 43 |
| H | 0.445196  | 57.79 | 108.37 | 30.71 | HD2 | ASH | 43 |
| C | 0.496339  | 58.78 | 104.70 | 27.76 | C   | ASH | 43 |
| O | -0.539978 | 59.66 | 105.33 | 27.18 | O   | ASH | 43 |
| N | -0.414760 | 57.71 | 104.22 | 27.13 | N   | TYR | 44 |
| H | 0.331071  | 57.06 | 103.66 | 27.64 | H   | TYR | 44 |
| C | 0.358056  | 57.48 | 104.47 | 25.71 | CA  | TYR | 44 |
| H | -0.003868 | 58.35 | 104.81 | 25.35 | HA  | TYR | 44 |
| C | -0.047047 | 57.08 | 103.20 | 24.96 | CB  | TYR | 44 |
| H | -0.218233 | 56.63 | 103.47 | 24.11 | HB1 | TYR | 44 |
| H | 0.104521  | 56.43 | 102.70 | 25.53 | HB2 | TYR | 44 |
| C | 0.006439  | 58.21 | 102.26 | 24.61 | CG  | TYR | 44 |
| C | -0.159088 | 58.87 | 101.52 | 25.60 | CD1 | TYR | 44 |
| H | 0.159742  | 58.62 | 101.66 | 26.56 | HD1 | TYR | 44 |
| C | -0.219686 | 59.87 | 100.60 | 25.27 | CE1 | TYR | 44 |
| H | 0.171788  | 60.33 | 100.08 | 25.99 | HE1 | TYR | 44 |
| C | 0.409278  | 60.22 | 100.42 | 23.94 | CZ  | TYR | 44 |
| O | -0.584063 | 61.19 | 99.50  | 23.60 | OH  | TYR | 44 |
| H | 0.461583  | 61.31 | 99.50  | 22.60 | HH  | TYR | 44 |
| C | -0.397282 | 59.58 | 101.15 | 22.94 | CE2 | TYR | 44 |
| H | 0.181666  | 59.83 | 101.02 | 21.98 | HE2 | TYR | 44 |
| C | -0.092126 | 58.58 | 102.06 | 23.28 | CD2 | TYR | 44 |
| H | 0.049084  | 58.12 | 102.58 | 22.56 | HD2 | TYR | 44 |
| C | 0.443055  | 56.35 | 105.50 | 25.59 | C   | TYR | 44 |
| O | -0.716858 | 55.75 | 105.66 | 24.51 | O   | TYR | 44 |
| N | -0.221434 | 56.04 | 106.18 | 26.70 | N   | GLY | 45 |
| H | 0.340528  | 56.55 | 105.98 | 27.54 | H   | GLY | 45 |
| C | -0.167548 | 55.00 | 107.19 | 26.71 | CA  | GLY | 45 |
| H | 0.111183  | 55.18 | 107.81 | 25.95 | HA1 | GLY | 45 |
| H | 0.114154  | 55.09 | 107.68 | 27.57 | HA2 | GLY | 45 |
| C | 0.469137  | 53.57 | 106.67 | 26.59 | C   | GLY | 45 |
| O | -0.576500 | 52.68 | 107.38 | 26.12 | O   | GLY | 45 |
| N | -0.587851 | 53.35 | 105.43 | 27.03 | N   | TRP | 46 |
| H | 0.372042  | 54.10 | 104.91 | 27.43 | H   | TRP | 46 |
| C | 0.462125  | 52.02 | 104.84 | 26.94 | CA  | TRP | 46 |
| H | 0.004823  | 51.54 | 105.51 | 26.37 | HA  | TRP | 46 |
| C | -0.154064 | 52.13 | 103.44 | 26.30 | CB  | TRP | 46 |
| H | 0.074012  | 52.66 | 102.85 | 26.90 | HB1 | TRP | 46 |
| H | 0.100327  | 52.59 | 103.53 | 25.41 | HB2 | TRP | 46 |
| C | -0.051716 | 50.80 | 102.77 | 26.06 | CG  | TRP | 46 |
| C | -0.208480 | 49.60 | 103.39 | 25.81 | CD1 | TRP | 46 |
| H | 0.126477  | 49.46 | 104.37 | 25.79 | HD1 | TRP | 46 |
| N | -0.386028 | 48.62 | 102.44 | 25.61 | NE1 | TRP | 46 |
| H | 0.348269  | 47.66 | 102.64 | 25.41 | HE1 | TRP | 46 |

|   |           |       |        |       |      |     |    |
|---|-----------|-------|--------|-------|------|-----|----|
| C | 0.211548  | 49.17 | 101.19 | 25.72 | CE2  | TRP | 46 |
| C | -0.281086 | 48.57 | 99.93  | 25.59 | CZ2  | TRP | 46 |
| H | 0.160338  | 47.60 | 99.84  | 25.39 | HZ2  | TRP | 46 |
| C | -0.075186 | 49.37 | 98.83  | 25.75 | CH2  | TRP | 46 |
| H | 0.152842  | 48.97 | 97.91  | 25.67 | HH2  | TRP | 46 |
| C | -0.207429 | 50.75 | 98.95  | 26.04 | CZ3  | TRP | 46 |
| H | 0.174752  | 51.31 | 98.13  | 26.15 | HZ3  | TRP | 46 |
| C | -0.175920 | 51.35 | 100.22 | 26.17 | CE3  | TRP | 46 |
| H | 0.152541  | 52.32 | 100.30 | 26.38 | HE3  | TRP | 46 |
| C | -0.003633 | 50.55 | 101.36 | 26.01 | CD2  | TRP | 46 |
| C | 0.451456  | 51.23 | 104.74 | 28.25 | C    | TRP | 46 |
| O | -0.460579 | 51.58 | 103.96 | 29.13 | O    | TRP | 46 |
| N | -0.573686 | 50.19 | 105.56 | 28.37 | N    | ASH | 47 |
| H | 0.361610  | 50.02 | 106.23 | 27.64 | H    | ASH | 47 |
| C | 0.124733  | 49.28 | 105.53 | 29.52 | CA   | ASH | 47 |
| H | -0.038361 | 49.17 | 104.56 | 29.72 | HA   | ASH | 47 |
| C | 0.080987  | 49.85 | 106.21 | 30.77 | CB   | ASH | 47 |
| H | 0.048739  | 49.87 | 107.20 | 30.61 | HB1  | ASH | 47 |
| H | 0.088026  | 50.79 | 105.89 | 30.91 | HB2  | ASH | 47 |
| C | 0.591108  | 49.02 | 105.91 | 32.03 | CG   | ASH | 47 |
| O | -0.540611 | 49.21 | 106.58 | 33.07 | OD1  | ASH | 47 |
| O | -0.606906 | 48.17 | 104.99 | 31.97 | OD2  | ASH | 47 |
| H | 0.425302  | 47.71 | 104.91 | 32.85 | HD2  | ASH | 47 |
| C | 0.415964  | 47.97 | 106.21 | 29.13 | C    | ASH | 47 |
| O | -0.496617 | 47.48 | 107.11 | 29.82 | O    | ASH | 47 |
| N | -0.370225 | 47.42 | 105.76 | 28.00 | N    | THR | 48 |
| H | 0.258060  | 47.89 | 105.02 | 27.51 | H    | THR | 48 |
| C | -0.347274 | 46.18 | 106.27 | 27.46 | CA   | THR | 48 |
| H | 0.215680  | 46.42 | 107.21 | 27.21 | HA   | THR | 48 |
| C | 0.474464  | 45.75 | 105.44 | 26.25 | CB   | THR | 48 |
| H | 0.000316  | 44.77 | 105.55 | 26.08 | HB   | THR | 48 |
| C | -0.452496 | 46.54 | 105.82 | 25.01 | CG2  | THR | 48 |
| H | 0.115009  | 46.24 | 105.26 | 24.23 | 1HG2 | THR | 48 |
| H | 0.107561  | 46.39 | 106.79 | 24.80 | 2HG2 | THR | 48 |
| H | 0.151031  | 47.52 | 105.67 | 25.17 | 3HG2 | THR | 48 |
| O | -0.635615 | 45.96 | 104.05 | 26.56 | OG1  | THR | 48 |
| H | 0.387172  | 45.68 | 103.50 | 25.77 | HG1  | THR | 48 |
| C | 0.459992  | 45.03 | 106.31 | 28.46 | C    | THR | 48 |
| O | -0.454540 | 44.14 | 107.14 | 28.35 | O    | THR | 48 |
| N | -0.491637 | 45.05 | 105.40 | 29.44 | N    | ALA | 49 |
| H | 0.223412  | 45.80 | 104.73 | 29.47 | H    | ALA | 49 |
| C | 0.365456  | 44.00 | 105.34 | 30.46 | CA   | ALA | 49 |
| H | 0.044209  | 43.19 | 105.72 | 30.02 | HA   | ALA | 49 |
| C | -0.418744 | 43.76 | 103.89 | 30.86 | CB   | ALA | 49 |
| H | 0.147902  | 43.04 | 103.86 | 31.56 | HB1  | ALA | 49 |
| H | 0.094709  | 43.47 | 103.37 | 30.06 | HB2  | ALA | 49 |



|   |           |       |        |       |      |     |    |
|---|-----------|-------|--------|-------|------|-----|----|
| H | 0.044512  | 44.60 | 103.51 | 31.23 | HB3  | ALA | 49 |
| C | 0.355926  | 44.35 | 106.17 | 31.69 | C    | ALA | 49 |
| O | -0.474854 | 43.59 | 106.22 | 32.66 | O    | ALA | 49 |
| N | -0.330045 | 45.52 | 106.82 | 31.66 | N    | GLY | 50 |
| H | 0.328785  | 46.11 | 106.74 | 30.86 | H    | GLY | 50 |
| C | -0.320820 | 45.94 | 107.66 | 32.77 | CA   | GLY | 50 |
| H | 0.212238  | 45.33 | 108.45 | 32.79 | HA1  | GLY | 50 |
| H | 0.135568  | 46.87 | 107.95 | 32.57 | HA2  | GLY | 50 |
| C | 0.511383  | 45.91 | 106.98 | 34.13 | C    | GLY | 50 |
| O | -0.525502 | 45.55 | 107.60 | 35.13 | O    | GLY | 50 |
| N | -0.443291 | 46.32 | 105.72 | 34.19 | N    | LEU | 51 |
| H | 0.178660  | 46.63 | 105.27 | 33.35 | H    | LEU | 51 |
| C | 0.004014  | 46.32 | 104.98 | 35.44 | CA   | LEU | 51 |
| H | 0.100135  | 45.51 | 105.32 | 35.92 | HA   | LEU | 51 |
| C | -0.040339 | 46.25 | 103.48 | 35.16 | CB   | LEU | 51 |
| H | 0.019921  | 46.26 | 103.01 | 36.04 | HB1  | LEU | 51 |
| H | 0.013188  | 47.06 | 103.23 | 34.64 | HB2  | LEU | 51 |
| C | 0.454431  | 45.02 | 103.01 | 34.39 | CG   | LEU | 51 |
| H | -0.052873 | 44.97 | 103.48 | 33.51 | HG   | LEU | 51 |
| C | -0.562331 | 45.13 | 101.51 | 34.16 | CD1  | LEU | 51 |
| H | 0.115595  | 44.33 | 101.19 | 33.65 | 1HD1 | LEU | 51 |
| H | 0.052453  | 45.95 | 101.31 | 33.64 | 2HD1 | LEU | 51 |
| H | 0.179178  | 45.17 | 101.04 | 35.04 | 3HD1 | LEU | 51 |
| C | -0.460171 | 43.75 | 103.36 | 35.15 | CD2  | LEU | 51 |
| H | 0.112815  | 42.95 | 103.04 | 34.63 | 1HD2 | LEU | 51 |
| H | 0.084234  | 43.76 | 102.91 | 36.05 | 2HD2 | LEU | 51 |
| H | 0.187527  | 43.69 | 104.35 | 35.28 | 3HD2 | LEU | 51 |
| C | 0.496492  | 47.54 | 105.27 | 36.32 | C    | LEU | 51 |
| O | -0.522474 | 47.57 | 104.88 | 37.48 | O    | LEU | 51 |
| N | -0.368128 | 48.54 | 105.96 | 35.76 | N    | SER | 52 |
| H | 0.238688  | 48.46 | 106.25 | 34.81 | H    | SER | 52 |
| C | 0.161946  | 49.74 | 106.29 | 36.53 | CA   | SER | 52 |
| H | 0.049529  | 49.55 | 105.93 | 37.44 | HA   | SER | 52 |
| C | 0.178167  | 50.97 | 105.63 | 35.91 | CB   | SER | 52 |
| H | -0.035700 | 51.81 | 106.00 | 36.30 | HB1  | SER | 52 |
| H | 0.047866  | 50.98 | 105.76 | 34.92 | HB2  | SER | 52 |
| O | -0.612279 | 50.97 | 104.23 | 36.14 | OG   | SER | 52 |
| H | 0.380281  | 51.79 | 103.82 | 35.73 | HG   | SER | 52 |
| C | 0.422403  | 49.97 | 107.80 | 36.64 | C    | SER | 52 |
| O | -0.509731 | 51.10 | 108.25 | 36.88 | O    | SER | 52 |
| N | -0.583210 | 48.90 | 108.58 | 36.47 | N    | ALA | 53 |
| H | 0.390152  | 48.02 | 108.15 | 36.28 | H    | ALA | 53 |
| C | 0.397486  | 48.98 | 110.03 | 36.54 | CA   | ALA | 53 |
| H | 0.090262  | 49.61 | 110.32 | 35.82 | HA   | ALA | 53 |
| C | -0.571759 | 47.60 | 110.64 | 36.31 | CB   | ALA | 53 |
| H | 0.191667  | 47.66 | 111.63 | 36.37 | HB1  | ALA | 53 |

|   |           |       |        |       |      |     |    |
|---|-----------|-------|--------|-------|------|-----|----|
| H | 0.145810  | 47.27 | 110.37 | 35.41 | HB2  | ALA | 53 |
| H | 0.190960  | 46.97 | 110.30 | 37.01 | HB3  | ALA | 53 |
| C | 0.036540  | 49.52 | 110.47 | 37.89 | C    | ALA | 53 |
| O | -0.232965 | 50.28 | 111.42 | 37.97 | O    | ALA | 53 |
| N | -0.666234 | 50.96 | 106.30 | 42.78 | N    | THR | 57 |
| H | 0.354114  | 50.51 | 107.17 | 42.63 | H    | THR | 57 |
| C | 0.320278  | 50.42 | 105.09 | 42.18 | CA   | THR | 57 |
| H | 0.053339  | 50.36 | 104.42 | 42.93 | HA   | THR | 57 |
| C | 0.460004  | 49.02 | 105.34 | 41.60 | CB   | THR | 57 |
| H | -0.072941 | 49.05 | 106.07 | 40.91 | HB   | THR | 57 |
| C | -0.535629 | 48.44 | 104.07 | 41.01 | CG2  | THR | 57 |
| H | 0.165360  | 47.53 | 104.26 | 40.63 | 1HG2 | THR | 57 |
| H | 0.089642  | 49.04 | 103.74 | 40.27 | 2HG2 | THR | 57 |
| H | 0.128647  | 48.37 | 103.37 | 41.72 | 3HG2 | THR | 57 |
| O | -0.600499 | 48.15 | 105.79 | 42.65 | OG1  | THR | 57 |
| H | 0.370616  | 47.24 | 105.96 | 42.27 | HG1  | THR | 57 |
| C | 0.399584  | 51.34 | 104.60 | 41.07 | C    | THR | 57 |
| O | -0.426743 | 51.51 | 103.40 | 40.87 | O    | THR | 57 |
| N | -0.473412 | 51.95 | 105.55 | 40.36 | N    | PHE | 58 |
| H | 0.335655  | 51.76 | 106.51 | 40.58 | H    | PHE | 58 |
| C | 0.102483  | 52.88 | 105.26 | 39.28 | CA   | PHE | 58 |
| H | 0.168376  | 52.37 | 104.75 | 38.59 | HA   | PHE | 58 |
| C | -0.670214 | 53.41 | 106.57 | 38.70 | CB   | PHE | 58 |
| H | 0.212441  | 53.90 | 107.07 | 39.42 | HB1  | PHE | 58 |
| H | 0.316687  | 52.64 | 107.12 | 38.38 | HB2  | PHE | 58 |
| C | 0.272170  | 54.36 | 106.40 | 37.55 | CG   | PHE | 58 |
| C | -0.188697 | 54.24 | 105.31 | 36.68 | CD1  | PHE | 58 |
| H | 0.132500  | 53.54 | 104.62 | 36.85 | HD1  | PHE | 58 |
| C | -0.186871 | 55.10 | 105.18 | 35.58 | CE1  | PHE | 58 |
| H | 0.142124  | 55.00 | 104.40 | 34.97 | HE1  | PHE | 58 |
| C | -0.107154 | 56.08 | 106.15 | 35.34 | CZ   | PHE | 58 |
| H | 0.133738  | 56.69 | 106.06 | 34.56 | HZ   | PHE | 58 |
| C | -0.162385 | 56.20 | 107.23 | 36.21 | CE2  | PHE | 58 |
| H | 0.171982  | 56.90 | 107.92 | 36.04 | HE2  | PHE | 58 |
| C | -0.201653 | 55.35 | 107.35 | 37.30 | CD2  | PHE | 58 |
| H | 0.158726  | 55.44 | 108.13 | 37.92 | HD2  | PHE | 58 |
| C | 0.165210  | 54.04 | 104.40 | 39.80 | C    | PHE | 58 |
| O | -0.330966 | 54.50 | 103.47 | 39.11 | O    | PHE | 58 |
| N | -0.726467 | 52.70 | 100.88 | 40.35 | N    | ASN | 61 |
| H | 0.433493  | 52.45 | 101.85 | 40.43 | H    | ASN | 61 |
| C | 0.525295  | 52.52 | 100.19 | 39.08 | CA   | ASN | 61 |
| H | -0.035027 | 51.99 | 99.38  | 39.32 | HA   | ASN | 61 |
| C | -0.250651 | 51.73 | 101.06 | 38.09 | CB   | ASN | 61 |
| H | -0.012067 | 51.85 | 100.69 | 37.17 | HB1  | ASN | 61 |
| H | 0.060807  | 52.09 | 102.00 | 38.13 | HB2  | ASN | 61 |
| C | 0.766985  | 50.23 | 101.10 | 38.40 | CG   | ASN | 61 |

|   |           |       |        |       |      |     |    |
|---|-----------|-------|--------|-------|------|-----|----|
| O | -0.564557 | 49.65 | 100.10 | 38.79 | OD1  | ASN | 61 |
| N | -0.946526 | 49.61 | 102.26 | 38.22 | ND2  | ASN | 61 |
| H | 0.419213  | 50.12 | 103.05 | 37.88 | 1HD2 | ASN | 61 |
| H | 0.438361  | 48.63 | 102.34 | 38.40 | 2HD2 | ASN | 61 |
| C | 0.464188  | 53.86 | 99.75  | 38.48 | C    | ASN | 61 |
| O | -0.592698 | 53.92 | 98.72  | 37.80 | O    | ASN | 61 |
| N | -0.480860 | 54.92 | 100.52 | 38.71 | N    | ARG | 62 |
| H | 0.346190  | 54.83 | 101.36 | 39.25 | H    | ARG | 62 |
| C | -0.039786 | 56.23 | 100.14 | 38.19 | CA   | ARG | 62 |
| H | 0.124378  | 56.09 | 99.98  | 37.21 | HA   | ARG | 62 |
| C | -0.000873 | 57.28 | 101.25 | 38.38 | CB   | ARG | 62 |
| H | -0.020218 | 58.19 | 100.85 | 38.26 | HB1  | ARG | 62 |
| H | 0.079713  | 57.19 | 101.60 | 39.32 | HB2  | ARG | 62 |
| C | 0.025511  | 57.14 | 102.44 | 37.42 | CG   | ARG | 62 |
| H | 0.044310  | 56.42 | 103.05 | 37.77 | HG1  | ARG | 62 |
| H | -0.004530 | 56.88 | 102.09 | 36.52 | HG2  | ARG | 62 |
| C | -0.098230 | 58.43 | 103.24 | 37.28 | CD   | ARG | 62 |
| H | 0.034456  | 58.28 | 104.00 | 36.65 | HD1  | ARG | 62 |
| H | 0.089335  | 59.15 | 102.65 | 36.92 | HD2  | ARG | 62 |
| N | -0.476780 | 58.91 | 103.80 | 38.54 | NE   | ARG | 62 |
| H | 0.235135  | 59.75 | 103.42 | 38.93 | HE   | ARG | 62 |
| C | 0.498778  | 58.31 | 104.78 | 39.21 | CZ   | ARG | 62 |
| N | -0.761989 | 57.20 | 105.34 | 38.75 | NH1  | ARG | 62 |
| H | 0.350236  | 56.80 | 105.02 | 37.89 | 1HH1 | ARG | 62 |
| H | 0.277432  | 56.75 | 106.07 | 39.27 | 2HH1 | ARG | 62 |
| N | -0.904043 | 58.82 | 105.21 | 40.36 | NH2  | ARG | 62 |
| H | 0.348267  | 59.66 | 104.80 | 40.72 | 1HH2 | ARG | 62 |
| H | 0.371006  | 58.37 | 105.95 | 40.86 | 2HH2 | ARG | 62 |
| C | 0.525177  | 56.70 | 98.88  | 38.90 | C    | ARG | 62 |
| O | -0.593269 | 57.33 | 98.01  | 38.29 | O    | ARG | 62 |
| N | -0.495501 | 56.39 | 98.77  | 40.19 | N    | GLU | 63 |
| H | 0.344067  | 55.87 | 99.50  | 40.63 | H    | GLU | 63 |
| C | 0.078933  | 56.80 | 97.61  | 40.96 | CA   | GLU | 63 |
| H | 0.048765  | 57.77 | 97.46  | 40.75 | HA   | GLU | 63 |
| C | 0.049234  | 56.64 | 97.89  | 42.46 | CB   | GLU | 63 |
| H | -0.019984 | 57.07 | 97.15  | 42.97 | HB1  | GLU | 63 |
| H | 0.041029  | 55.66 | 97.92  | 42.68 | HB2  | GLU | 63 |
| C | -0.023362 | 57.27 | 99.21  | 42.90 | CG   | GLU | 63 |
| H | 0.001515  | 56.69 | 99.96  | 42.57 | HG1  | GLU | 63 |
| H | 0.014908  | 58.17 | 99.28  | 42.48 | HG2  | GLU | 63 |
| C | 0.620281  | 57.42 | 99.35  | 44.42 | CD   | GLU | 63 |
| O | -0.311130 | 56.48 | 98.98  | 45.16 | OE1  | GLU | 63 |
| O | -0.341125 | 58.47 | 99.86  | 44.87 | OE2  | GLU | 63 |
| C | 0.547381  | 56.00 | 96.39  | 40.55 | C    | GLU | 63 |
| O | -0.628636 | 56.54 | 95.30  | 40.40 | O    | GLU | 63 |
| N | -0.486414 | 54.70 | 96.58  | 40.36 | N    | LEU | 64 |

|   |           |       |       |       |      |     |    |
|---|-----------|-------|-------|-------|------|-----|----|
| H | 0.298765  | 54.31 | 97.48 | 40.51 | H    | LEU | 64 |
| C | 0.128648  | 53.82 | 95.49 | 39.93 | CA   | LEU | 64 |
| H | 0.047183  | 53.89 | 94.80 | 40.65 | HA   | LEU | 64 |
| C | -0.246297 | 52.38 | 96.00 | 39.80 | CB   | LEU | 64 |
| H | 0.048007  | 51.90 | 95.36 | 39.20 | HB1  | LEU | 64 |
| H | 0.064829  | 52.43 | 96.89 | 39.35 | HB2  | LEU | 64 |
| C | 0.530219  | 51.52 | 96.18 | 41.04 | CG   | LEU | 64 |
| H | -0.088358 | 52.05 | 96.61 | 41.77 | HG   | LEU | 64 |
| C | -0.426890 | 50.32 | 97.09 | 40.73 | CD1  | LEU | 64 |
| H | 0.107473  | 49.76 | 97.21 | 41.55 | 1HD1 | LEU | 64 |
| H | 0.104000  | 50.65 | 97.99 | 40.42 | 2HD1 | LEU | 64 |
| H | 0.065707  | 49.77 | 96.68 | 40.00 | 3HD1 | LEU | 64 |
| C | -0.434718 | 51.05 | 94.82 | 41.54 | CD2  | LEU | 64 |
| H | 0.092917  | 50.48 | 94.94 | 42.35 | 1HD2 | LEU | 64 |
| H | 0.073323  | 50.51 | 94.38 | 40.82 | 2HD2 | LEU | 64 |
| H | 0.132605  | 51.84 | 94.26 | 41.76 | 3HD2 | LEU | 64 |
| C | 0.516717  | 54.27 | 94.92 | 38.59 | C    | LEU | 64 |
| O | -0.280026 | 54.28 | 93.70 | 38.37 | O    | LEU | 64 |
| N | -0.492368 | 54.66 | 95.82 | 37.68 | N    | GLU | 65 |
| H | 0.363268  | 54.65 | 96.79 | 37.93 | H    | GLU | 65 |
| C | 0.167231  | 55.10 | 95.44 | 36.35 | CA   | GLU | 65 |
| H | 0.045209  | 54.37 | 94.84 | 36.02 | HA   | GLU | 65 |
| C | 0.054576  | 55.26 | 96.68 | 35.46 | CB   | GLU | 65 |
| H | 0.046517  | 56.10 | 97.14 | 35.71 | HB1  | GLU | 65 |
| H | 0.043029  | 54.48 | 97.29 | 35.63 | HB2  | GLU | 65 |
| C | -0.232687 | 55.31 | 96.37 | 33.98 | CG   | GLU | 65 |
| H | 0.087816  | 54.44 | 95.97 | 33.70 | HG1  | GLU | 65 |
| H | 0.055374  | 56.05 | 95.72 | 33.81 | HG2  | GLU | 65 |
| C | 0.763021  | 55.55 | 97.61 | 33.13 | CD   | GLU | 65 |
| O | -0.774258 | 55.15 | 97.61 | 31.94 | OE1  | GLU | 65 |
| O | -0.530012 | 56.14 | 98.59 | 33.65 | OE2  | GLU | 65 |
| C | 0.568177  | 56.41 | 94.64 | 36.34 | C    | GLU | 65 |
| O | -0.602493 | 56.48 | 93.59 | 35.71 | O    | GLU | 65 |
| N | -0.475380 | 57.42 | 95.13 | 37.04 | N    | VAL | 66 |
| H | 0.351734  | 57.30 | 95.99 | 37.54 | H    | VAL | 66 |
| C | -0.129286 | 58.71 | 94.44 | 37.09 | CA   | VAL | 66 |
| H | 0.064094  | 58.94 | 94.32 | 36.12 | HA   | VAL | 66 |
| C | 0.442404  | 59.77 | 95.31 | 37.83 | CB   | VAL | 66 |
| H | 0.018127  | 59.42 | 95.60 | 38.72 | HB   | VAL | 66 |
| C | -0.526400 | 61.05 | 94.50 | 38.06 | CG1  | VAL | 66 |
| H | 0.124885  | 61.72 | 95.08 | 38.54 | 1HG1 | VAL | 66 |
| H | 0.096076  | 60.84 | 93.70 | 38.62 | 2HG1 | VAL | 66 |
| H | 0.093505  | 61.43 | 94.21 | 37.18 | 3HG1 | VAL | 66 |
| C | -0.377888 | 60.08 | 96.55 | 37.01 | CG2  | VAL | 66 |
| H | 0.073975  | 60.77 | 97.10 | 37.48 | 1HG2 | VAL | 66 |
| H | 0.075093  | 60.44 | 96.28 | 36.11 | 2HG2 | VAL | 66 |

|   |           |       |       |       |      |     |    |
|---|-----------|-------|-------|-------|------|-----|----|
| H | 0.106981  | 59.25 | 97.09 | 36.89 | 3HG2 | VAL | 66 |
| C | 0.498093  | 58.59 | 93.08 | 37.76 | C    | VAL | 66 |
| O | -0.675734 | 59.20 | 92.10 | 37.31 | O    | VAL | 66 |
| N | -0.408937 | 57.80 | 93.00 | 38.82 | N    | ILE | 67 |
| H | 0.347740  | 57.32 | 93.82 | 39.15 | H    | ILE | 67 |
| C | 0.079969  | 57.61 | 91.74 | 39.52 | CA   | ILE | 67 |
| H | 0.010531  | 58.53 | 91.40 | 39.73 | HA   | ILE | 67 |
| C | 0.167568  | 56.82 | 91.93 | 40.84 | CB   | ILE | 67 |
| H | 0.050747  | 55.97 | 92.42 | 40.65 | HB   | ILE | 67 |
| C | -0.383427 | 56.47 | 90.58 | 41.43 | CG2  | ILE | 67 |
| H | 0.128479  | 55.96 | 90.71 | 42.29 | 1HG2 | ILE | 67 |
| H | 0.062995  | 55.91 | 90.06 | 40.79 | 2HG2 | ILE | 67 |
| H | 0.067060  | 57.31 | 90.07 | 41.62 | 3HG2 | ILE | 67 |
| C | 0.060982  | 57.66 | 92.74 | 41.83 | CG1  | ILE | 67 |
| H | 0.027972  | 57.15 | 92.81 | 42.69 | 1HG1 | ILE | 67 |
| H | -0.005538 | 57.80 | 93.66 | 41.45 | 2HG1 | ILE | 67 |
| C | -0.250888 | 59.05 | 92.14 | 42.15 | CD   | ILE | 67 |
| H | 0.068368  | 59.52 | 92.73 | 42.80 | HD1  | ILE | 67 |
| H | 0.072166  | 58.93 | 91.23 | 42.54 | HD2  | ILE | 67 |
| H | 0.035760  | 59.58 | 92.08 | 41.30 | HD3  | ILE | 67 |
| C | 0.555809  | 56.87 | 90.78 | 38.60 | C    | ILE | 67 |
| O | -0.678589 | 57.28 | 89.63 | 38.43 | O    | ILE | 67 |
| N | -0.388332 | 55.77 | 91.23 | 38.01 | N    | HIS | 68 |
| H | 0.290685  | 55.44 | 92.16 | 38.20 | H    | HIS | 68 |
| C | 0.136647  | 55.04 | 90.38 | 37.08 | CA   | HIS | 68 |
| H | -0.016960 | 54.68 | 89.61 | 37.61 | HA   | HIS | 68 |
| C | -0.417223 | 53.87 | 91.15 | 36.44 | CB   | HIS | 68 |
| H | 0.120348  | 53.73 | 90.80 | 35.51 | HB1  | HIS | 68 |
| H | 0.246021  | 54.10 | 92.12 | 36.40 | HB2  | HIS | 68 |
| C | 0.322975  | 52.58 | 91.02 | 37.18 | CG   | HIS | 68 |
| N | -0.549022 | 52.38 | 91.54 | 38.45 | ND1  | HIS | 68 |
| C | 0.199162  | 51.14 | 91.30 | 38.83 | CE1  | HIS | 68 |
| H | 0.115173  | 50.74 | 91.57 | 39.71 | HE1  | HIS | 68 |
| N | -0.199645 | 50.52 | 90.64 | 37.87 | NE2  | HIS | 68 |
| H | 0.472988  | 49.57 | 90.33 | 37.89 | HE2  | HIS | 68 |
| C | -0.255121 | 51.40 | 90.45 | 36.83 | CD2  | HIS | 68 |
| H | 0.133249  | 51.20 | 89.98 | 35.97 | HD2  | HIS | 68 |
| C | 0.513760  | 56.02 | 89.95 | 35.99 | C    | HIS | 68 |
| O | -0.709522 | 55.99 | 88.80 | 35.52 | O    | HIS | 68 |
| N | -0.340469 | 56.91 | 90.86 | 35.60 | N    | CYS | 69 |
| H | 0.328302  | 56.88 | 91.76 | 36.03 | H    | CYS | 69 |
| C | 0.105211  | 57.91 | 90.60 | 34.57 | CA   | CYS | 69 |
| H | 0.083918  | 57.36 | 90.44 | 33.75 | HA   | CYS | 69 |
| C | -0.061611 | 58.86 | 91.80 | 34.41 | CB   | CYS | 69 |
| H | 0.069222  | 59.75 | 91.39 | 34.21 | HB1  | CYS | 69 |
| H | 0.204358  | 58.89 | 92.21 | 35.32 | HB2  | CYS | 69 |

|   |           |       |       |       |      |     |    |
|---|-----------|-------|-------|-------|------|-----|----|
| S | -0.600381 | 58.37 | 93.00 | 33.16 | SG   | CYS | 69 |
| H | 0.338675  | 59.04 | 93.74 | 33.13 | HG   | CYS | 69 |
| C | 0.548843  | 58.77 | 89.39 | 34.86 | C    | CYS | 69 |
| O | -0.672294 | 58.88 | 88.48 | 34.04 | O    | CYS | 69 |
| N | -0.556835 | 59.38 | 89.39 | 36.03 | N    | ARG | 70 |
| H | 0.409508  | 59.23 | 90.16 | 36.66 | H    | ARG | 70 |
| C | 0.417407  | 60.25 | 88.30 | 36.44 | CA   | ARG | 70 |
| H | -0.076087 | 60.91 | 88.20 | 35.69 | HA   | ARG | 70 |
| C | -0.343475 | 60.95 | 88.70 | 37.74 | CB   | ARG | 70 |
| H | 0.031952  | 61.47 | 87.92 | 38.08 | HB1  | ARG | 70 |
| H | 0.091806  | 60.26 | 88.97 | 38.41 | HB2  | ARG | 70 |
| C | 0.310934  | 61.90 | 89.87 | 37.52 | CG   | ARG | 70 |
| H | -0.099877 | 61.46 | 90.52 | 36.89 | HG1  | ARG | 70 |
| H | -0.031105 | 62.74 | 89.53 | 37.10 | HG2  | ARG | 70 |
| C | 0.189405  | 62.26 | 90.60 | 38.79 | CD   | ARG | 70 |
| H | -0.009325 | 62.65 | 89.96 | 39.45 | HD1  | ARG | 70 |
| H | 0.005133  | 61.44 | 91.02 | 39.19 | HD2  | ARG | 70 |
| N | -0.767444 | 63.23 | 91.65 | 38.52 | NE   | ARG | 70 |
| H | 0.366204  | 63.60 | 91.71 | 37.59 | HE   | ARG | 70 |
| C | 0.798955  | 63.67 | 92.52 | 39.42 | CZ   | ARG | 70 |
| N | -1.108164 | 63.22 | 92.48 | 40.66 | NH1  | ARG | 70 |
| H | 0.435219  | 62.55 | 91.79 | 40.93 | 1HH1 | ARG | 70 |
| H | 0.406085  | 63.56 | 93.14 | 41.34 | 2HH1 | ARG | 70 |
| N | -1.204966 | 64.58 | 93.42 | 39.07 | NH2  | ARG | 70 |
| H | 0.461332  | 64.93 | 93.45 | 38.13 | 1HH2 | ARG | 70 |
| H | 0.431513  | 64.92 | 94.08 | 39.74 | 2HH2 | ARG | 70 |
| C | 0.528287  | 59.52 | 86.97 | 36.57 | C    | ARG | 70 |
| O | -0.653142 | 60.06 | 85.93 | 36.21 | O    | ARG | 70 |
| N | -0.484701 | 58.30 | 87.01 | 37.09 | N    | TRP | 71 |
| H | 0.373260  | 57.92 | 87.88 | 37.39 | H    | TRP | 71 |
| C | 0.331561  | 57.52 | 85.79 | 37.24 | CA   | TRP | 71 |
| H | -0.033078 | 58.11 | 85.15 | 37.73 | HA   | TRP | 71 |
| C | -0.209185 | 56.25 | 86.07 | 38.03 | CB   | TRP | 71 |
| H | 0.048919  | 55.54 | 85.42 | 37.76 | HB1  | TRP | 71 |
| H | 0.147374  | 55.93 | 87.00 | 37.83 | HB2  | TRP | 71 |
| C | -0.140710 | 56.42 | 85.97 | 39.51 | CG   | TRP | 71 |
| C | -0.209558 | 56.33 | 86.98 | 40.43 | CD1  | TRP | 71 |
| H | 0.227636  | 56.16 | 87.94 | 40.20 | HD1  | TRP | 71 |
| N | -0.322691 | 56.49 | 86.48 | 41.70 | NE1  | TRP | 71 |
| H | 0.336885  | 56.46 | 87.02 | 42.54 | HE1  | TRP | 71 |
| C | 0.116927  | 56.70 | 85.13 | 41.63 | CE2  | TRP | 71 |
| C | -0.264939 | 56.92 | 84.20 | 42.65 | CZ2  | TRP | 71 |
| H | 0.137622  | 56.94 | 84.48 | 43.61 | HZ2  | TRP | 71 |
| C | -0.135272 | 57.10 | 82.89 | 42.28 | CH2  | TRP | 71 |
| H | 0.115575  | 57.25 | 82.20 | 42.98 | HH2  | TRP | 71 |
| C | -0.228062 | 57.07 | 82.50 | 40.93 | CZ3  | TRP | 71 |

|   |           |       |       |       |      |     |    |
|---|-----------|-------|-------|-------|------|-----|----|
| H | 0.152618  | 57.21 | 81.54 | 40.70 | HZ3  | TRP | 71 |
| C | -0.142894 | 56.86 | 83.43 | 39.92 | CE3  | TRP | 71 |
| H | 0.095433  | 56.84 | 83.14 | 38.96 | HE3  | TRP | 71 |
| C | 0.163789  | 56.67 | 84.77 | 40.27 | CD2  | TRP | 71 |
| C | 0.542586  | 57.14 | 85.25 | 35.86 | C    | TRP | 71 |
| O | -0.671783 | 57.14 | 84.04 | 35.65 | O    | TRP | 71 |
| N | -0.507196 | 56.84 | 86.16 | 34.94 | N    | ALA | 72 |
| H | 0.392064  | 56.89 | 87.13 | 35.17 | H    | ALA | 72 |
| C | 0.348578  | 56.44 | 85.78 | 33.59 | CA   | ALA | 72 |
| H | -0.030592 | 55.76 | 85.06 | 33.71 | HA   | ALA | 72 |
| C | -0.315229 | 55.83 | 86.98 | 32.87 | CB   | ALA | 72 |
| H | 0.040540  | 55.56 | 86.71 | 31.95 | HB1  | ALA | 72 |
| H | 0.075136  | 55.03 | 87.29 | 33.38 | HB2  | ALA | 72 |
| H | 0.156763  | 56.51 | 87.71 | 32.82 | HB3  | ALA | 72 |
| C | 0.544718  | 57.60 | 85.21 | 32.77 | C    | ALA | 72 |
| O | -0.651381 | 57.39 | 84.41 | 31.86 | O    | ALA | 72 |
| N | -0.522509 | 58.82 | 85.63 | 33.10 | N    | MET | 73 |
| H | 0.405130  | 58.93 | 86.29 | 33.84 | H    | MET | 73 |
| C | 0.068365  | 59.98 | 85.12 | 32.39 | CA   | MET | 73 |
| H | 0.035513  | 59.73 | 85.10 | 31.42 | HA   | MET | 73 |
| C | 0.177329  | 61.18 | 86.05 | 32.57 | CB   | MET | 73 |
| H | -0.041717 | 62.01 | 85.57 | 32.27 | HB1  | MET | 73 |
| H | 0.017589  | 61.26 | 86.29 | 33.53 | HB2  | MET | 73 |
| C | -0.000283 | 61.04 | 87.33 | 31.75 | CG   | MET | 73 |
| H | 0.096639  | 60.26 | 87.80 | 32.16 | HG1  | MET | 73 |
| H | 0.035972  | 60.79 | 87.01 | 30.83 | HG2  | MET | 73 |
| S | -0.371203 | 62.50 | 88.37 | 31.72 | SD   | MET | 73 |
| C | -0.262066 | 62.25 | 89.41 | 33.23 | CE   | MET | 73 |
| H | 0.181615  | 63.01 | 90.04 | 33.32 | HE1  | MET | 73 |
| H | 0.134654  | 61.39 | 89.92 | 33.14 | HE2  | MET | 73 |
| H | 0.123528  | 62.20 | 88.82 | 34.03 | HE3  | MET | 73 |
| C | 0.534644  | 60.30 | 83.72 | 32.88 | C    | MET | 73 |
| O | -0.620713 | 60.63 | 82.85 | 32.08 | O    | MET | 73 |
| N | -0.475565 | 60.19 | 83.51 | 34.19 | N    | LEU | 74 |
| H | 0.344890  | 59.94 | 84.26 | 34.80 | H    | LEU | 74 |
| C | 0.111657  | 60.45 | 82.19 | 34.75 | CA   | LEU | 74 |
| H | 0.044652  | 61.36 | 81.91 | 34.45 | HA   | LEU | 74 |
| C | -0.229909 | 60.42 | 82.22 | 36.28 | CB   | LEU | 74 |
| H | 0.020862  | 60.39 | 81.28 | 36.60 | HB1  | LEU | 74 |
| H | 0.095499  | 59.58 | 82.69 | 36.55 | HB2  | LEU | 74 |
| C | 0.524329  | 61.58 | 82.91 | 37.02 | CG   | LEU | 74 |
| H | -0.046271 | 61.64 | 83.87 | 36.73 | HG   | LEU | 74 |
| C | -0.375564 | 61.33 | 82.86 | 38.51 | CD1  | LEU | 74 |
| H | 0.073893  | 62.08 | 83.31 | 38.99 | 1HD1 | LEU | 74 |
| H | 0.059041  | 60.47 | 83.33 | 38.73 | 2HD1 | LEU | 74 |
| H | 0.072868  | 61.27 | 81.91 | 38.81 | 3HD1 | LEU | 74 |

|   |           |       |       |       |      |     |    |
|---|-----------|-------|-------|-------|------|-----|----|
| C | -0.593206 | 62.90 | 82.24 | 36.70 | CD2  | LEU | 74 |
| H | 0.138750  | 63.64 | 82.70 | 37.19 | 1HD2 | LEU | 74 |
| H | 0.115025  | 62.86 | 81.28 | 36.98 | 2HD2 | LEU | 74 |
| H | 0.164516  | 63.07 | 82.29 | 35.71 | 3HD2 | LEU | 74 |
| C | 0.488181  | 59.35 | 81.25 | 34.23 | C    | LEU | 74 |
| O | -0.613803 | 59.62 | 80.12 | 33.82 | O    | LEU | 74 |
| N | -0.353602 | 58.11 | 81.76 | 34.23 | N    | GLY | 75 |
| H | 0.335831  | 57.97 | 82.69 | 34.55 | H    | GLY | 75 |
| C | -0.000691 | 56.97 | 80.98 | 33.77 | CA   | GLY | 75 |
| H | 0.017482  | 56.15 | 81.51 | 33.99 | HA1  | GLY | 75 |
| H | 0.033678  | 56.97 | 80.13 | 34.30 | HA2  | GLY | 75 |
| C | 0.458793  | 56.96 | 80.65 | 32.29 | C    | GLY | 75 |
| O | -0.623841 | 56.47 | 79.59 | 31.89 | O    | GLY | 75 |
| N | -0.417525 | 57.48 | 81.55 | 31.46 | N    | ALA | 76 |
| H | 0.352094  | 57.85 | 82.40 | 31.83 | H    | ALA | 76 |
| C | 0.222411  | 57.50 | 81.31 | 30.03 | CA   | ALA | 76 |
| H | 0.027387  | 56.57 | 81.07 | 29.75 | HA   | ALA | 76 |
| C | -0.249956 | 57.94 | 82.57 | 29.29 | CB   | ALA | 76 |
| H | -0.017494 | 57.96 | 82.39 | 28.30 | HB1  | ALA | 76 |
| H | 0.103047  | 57.30 | 83.32 | 29.48 | HB2  | ALA | 76 |
| H | 0.123464  | 58.86 | 82.84 | 29.59 | HB3  | ALA | 76 |
| C | 0.540739  | 58.47 | 80.17 | 29.76 | C    | ALA | 76 |
| O | -0.645718 | 58.13 | 79.19 | 29.09 | O    | ALA | 76 |
| N | -0.507703 | 59.69 | 80.31 | 30.27 | N    | LEU | 77 |
| H | 0.350555  | 59.91 | 81.13 | 30.80 | H    | LEU | 77 |
| C | 0.199855  | 60.71 | 79.30 | 30.09 | CA   | LEU | 77 |
| H | -0.001386 | 60.82 | 79.19 | 29.10 | HA   | LEU | 77 |
| C | -0.210921 | 62.03 | 79.77 | 30.71 | CB   | LEU | 77 |
| H | 0.117054  | 61.84 | 79.99 | 31.67 | HB1  | LEU | 77 |
| H | 0.096605  | 62.31 | 80.59 | 30.22 | HB2  | LEU | 77 |
| C | 0.288017  | 63.21 | 78.79 | 30.69 | CG   | LEU | 77 |
| H | -0.063043 | 62.97 | 77.96 | 31.19 | HG   | LEU | 77 |
| C | -0.249848 | 63.52 | 78.38 | 29.25 | CD1  | LEU | 77 |
| H | 0.046990  | 64.28 | 77.74 | 29.24 | 1HD1 | LEU | 77 |
| H | 0.014403  | 62.71 | 77.94 | 28.84 | 2HD1 | LEU | 77 |
| H | 0.055606  | 63.75 | 79.19 | 28.71 | 3HD1 | LEU | 77 |
| C | -0.344437 | 64.43 | 79.43 | 31.36 | CD2  | LEU | 77 |
| H | 0.046793  | 65.19 | 78.79 | 31.34 | 1HD2 | LEU | 77 |
| H | 0.133239  | 64.67 | 80.27 | 30.86 | 2HD2 | LEU | 77 |
| H | 0.103504  | 64.20 | 79.66 | 32.30 | 3HD2 | LEU | 77 |
| C | 0.492331  | 60.26 | 77.97 | 30.71 | C    | LEU | 77 |
| O | -0.626976 | 60.43 | 76.90 | 30.13 | O    | LEU | 77 |
| N | -0.318085 | 59.65 | 78.06 | 31.89 | N    | GLY | 78 |
| H | 0.333609  | 59.52 | 78.96 | 32.32 | H    | GLY | 78 |
| C | -0.103873 | 59.18 | 76.87 | 32.57 | CA   | GLY | 78 |
| H | 0.084340  | 58.87 | 77.16 | 33.48 | HA1  | GLY | 78 |



|   |           |       |       |       |      |     |    |
|---|-----------|-------|-------|-------|------|-----|----|
| H | 0.078746  | 59.97 | 76.26 | 32.67 | HA2  | GLY | 78 |
| C | 0.472647  | 58.06 | 76.12 | 31.89 | C    | GLY | 78 |
| O | -0.582098 | 57.98 | 74.89 | 31.98 | O    | GLY | 78 |
| N | -0.448968 | 57.17 | 76.83 | 31.20 | N    | CYS | 79 |
| H | 0.364800  | 57.27 | 77.83 | 31.16 | H    | CYS | 79 |
| C | 0.142377  | 56.05 | 76.19 | 30.52 | CA   | CYS | 79 |
| H | 0.070313  | 55.71 | 75.52 | 31.19 | HA   | CYS | 79 |
| C | -0.094705 | 54.97 | 77.22 | 30.16 | CB   | CYS | 79 |
| H | 0.075496  | 54.41 | 76.75 | 29.48 | HB1  | CYS | 79 |
| H | 0.152741  | 55.48 | 77.96 | 29.71 | HB2  | CYS | 79 |
| S | -0.617130 | 54.00 | 77.82 | 31.55 | SG   | CYS | 79 |
| H | 0.398653  | 53.33 | 78.48 | 31.22 | HG   | CYS | 79 |
| C | 0.489749  | 56.50 | 75.47 | 29.26 | C    | CYS | 79 |
| O | -0.587799 | 55.95 | 74.43 | 28.89 | O    | CYS | 79 |
| N | -0.413748 | 57.51 | 76.02 | 28.61 | N    | VAL | 80 |
| H | 0.345863  | 57.93 | 76.85 | 28.97 | H    | VAL | 80 |
| C | 0.032897  | 58.02 | 75.47 | 27.37 | CA   | VAL | 80 |
| H | 0.037943  | 57.20 | 75.02 | 27.01 | HA   | VAL | 80 |
| C | 0.259328  | 58.60 | 76.60 | 26.47 | CB   | VAL | 80 |
| H | 0.033697  | 59.31 | 77.10 | 26.96 | HB   | VAL | 80 |
| C | -0.475372 | 59.22 | 76.02 | 25.22 | CG1  | VAL | 80 |
| H | 0.127001  | 59.58 | 76.76 | 24.65 | 1HG1 | VAL | 80 |
| H | 0.099619  | 59.96 | 75.39 | 25.47 | 2HG1 | VAL | 80 |
| H | 0.097798  | 58.52 | 75.52 | 24.70 | 3HG1 | VAL | 80 |
| C | -0.226494 | 57.51 | 77.57 | 26.09 | CG2  | VAL | 80 |
| H | 0.041796  | 57.89 | 78.29 | 25.51 | 1HG2 | VAL | 80 |
| H | 0.056426  | 56.79 | 77.09 | 25.59 | 2HG2 | VAL | 80 |
| H | 0.030104  | 57.12 | 77.98 | 26.92 | 3HG2 | VAL | 80 |
| C | 0.499595  | 59.09 | 74.38 | 27.51 | C    | VAL | 80 |
| O | -0.631337 | 59.06 | 73.38 | 26.80 | O    | VAL | 80 |
| N | -0.534404 | 60.02 | 74.57 | 28.44 | N    | PHE | 81 |
| H | 0.380106  | 59.96 | 75.37 | 29.04 | H    | PHE | 81 |
| C | 0.246655  | 61.13 | 73.64 | 28.61 | CA   | PHE | 81 |
| H | 0.004094  | 61.61 | 73.78 | 27.74 | HA   | PHE | 81 |
| C | -0.254491 | 61.98 | 74.02 | 29.83 | CB   | PHE | 81 |
| H | 0.094983  | 61.54 | 73.68 | 30.66 | HB1  | PHE | 81 |
| H | 0.151442  | 62.05 | 75.02 | 29.88 | HB2  | PHE | 81 |
| C | 0.083175  | 63.38 | 73.47 | 29.78 | CG   | PHE | 81 |
| C | -0.183905 | 64.28 | 73.92 | 28.82 | CD1  | PHE | 81 |
| H | 0.140372  | 64.01 | 74.67 | 28.21 | HD1  | PHE | 81 |
| C | -0.119626 | 65.54 | 73.35 | 28.70 | CE1  | PHE | 81 |
| H | 0.124905  | 66.18 | 73.69 | 28.01 | HE1  | PHE | 81 |
| C | -0.130292 | 65.92 | 72.31 | 29.55 | CZ   | PHE | 81 |
| H | 0.124657  | 66.83 | 71.90 | 29.47 | HZ   | PHE | 81 |
| C | -0.123195 | 65.03 | 71.86 | 30.52 | CE2  | PHE | 81 |
| H | 0.122770  | 65.30 | 71.11 | 31.13 | HE2  | PHE | 81 |

|   |           |       |       |       |      |     |    |
|---|-----------|-------|-------|-------|------|-----|----|
| C | -0.171497 | 63.76 | 72.43 | 30.63 | CD2  | PHE | 81 |
| H | 0.125116  | 63.13 | 72.10 | 31.32 | HD2  | PHE | 81 |
| C | 0.408222  | 60.78 | 72.15 | 28.66 | C    | PHE | 81 |
| O | -0.570993 | 61.32 | 71.37 | 27.88 | O    | PHE | 81 |
| N | -0.157319 | 59.89 | 71.74 | 29.57 | N    | PRO | 82 |
| C | -0.136718 | 59.36 | 72.44 | 30.75 | CD   | PRO | 82 |
| H | 0.139797  | 58.54 | 72.97 | 30.51 | HD1  | PRO | 82 |
| H | 0.075243  | 60.05 | 73.06 | 31.13 | HD2  | PRO | 82 |
| C | 0.136025  | 59.04 | 71.29 | 31.70 | CG   | PRO | 82 |
| H | -0.005276 | 58.34 | 71.54 | 32.37 | HG1  | PRO | 82 |
| H | -0.015007 | 59.86 | 70.97 | 32.17 | HG2  | PRO | 82 |
| C | -0.144377 | 58.53 | 70.26 | 30.77 | CB   | PRO | 82 |
| H | 0.079756  | 57.60 | 70.48 | 30.46 | HB1  | PRO | 82 |
| H | 0.021051  | 58.52 | 69.36 | 31.21 | HB2  | PRO | 82 |
| C | 0.058994  | 59.54 | 70.32 | 29.63 | CA   | PRO | 82 |
| H | 0.048361  | 60.35 | 69.76 | 29.78 | HA   | PRO | 82 |
| C | 0.504215  | 58.96 | 69.79 | 28.30 | C    | PRO | 82 |
| O | -0.435674 | 59.36 | 68.73 | 27.82 | O    | PRO | 82 |
| N | -0.241673 | 58.03 | 70.54 | 27.72 | N    | GLU | 83 |
| H | 0.271740  | 57.74 | 71.40 | 28.14 | H    | GLU | 83 |
| C | -0.124607 | 57.42 | 70.12 | 26.45 | CA   | GLU | 83 |
| H | 0.048121  | 57.01 | 69.23 | 26.62 | HA   | GLU | 83 |
| C | 0.206397  | 56.33 | 71.12 | 26.03 | CB   | GLU | 83 |
| H | 0.060669  | 56.74 | 72.03 | 25.98 | HB1  | GLU | 83 |
| H | -0.024924 | 55.62 | 71.12 | 26.74 | HB2  | GLU | 83 |
| C | -0.299304 | 55.67 | 70.82 | 24.69 | CG   | GLU | 83 |
| H | 0.085847  | 55.39 | 69.87 | 24.68 | HG1  | GLU | 83 |
| H | 0.068298  | 56.34 | 70.98 | 23.96 | HG2  | GLU | 83 |
| C | 0.712141  | 54.45 | 71.70 | 24.41 | CD   | GLU | 83 |
| O | -0.523653 | 54.43 | 72.87 | 24.84 | OE1  | GLU | 83 |
| O | -0.501908 | 53.51 | 71.21 | 23.74 | OE2  | GLU | 83 |
| C | 0.517948  | 58.51 | 70.00 | 25.38 | C    | GLU | 83 |
| O | -0.569329 | 58.44 | 69.14 | 24.49 | O    | GLU | 83 |
| N | -0.663430 | 59.53 | 70.85 | 25.47 | N    | LEU | 84 |
| H | 0.442615  | 59.55 | 71.52 | 26.21 | H    | LEU | 84 |
| C | 0.641301  | 60.63 | 70.81 | 24.51 | CA   | LEU | 84 |
| H | -0.054395 | 60.21 | 70.86 | 23.61 | HA   | LEU | 84 |
| C | -0.989811 | 61.57 | 72.00 | 24.72 | CB   | LEU | 84 |
| H | 0.283097  | 61.92 | 71.96 | 25.66 | HB1  | LEU | 84 |
| H | 0.243049  | 61.04 | 72.84 | 24.60 | HB2  | LEU | 84 |
| C | 0.659978  | 62.77 | 72.05 | 23.77 | CG   | LEU | 84 |
| H | -0.110676 | 63.33 | 71.23 | 23.88 | HG   | LEU | 84 |
| C | -0.304517 | 62.29 | 72.11 | 22.34 | CD1  | LEU | 84 |
| H | 0.034193  | 63.08 | 72.14 | 21.72 | 1HD1 | LEU | 84 |
| H | 0.066494  | 61.75 | 71.29 | 22.14 | 2HD1 | LEU | 84 |
| H | 0.059186  | 61.73 | 72.92 | 22.20 | 3HD1 | LEU | 84 |

|   |           |       |       |       |      |     |    |
|---|-----------|-------|-------|-------|------|-----|----|
| C | -0.291123 | 63.63 | 73.27 | 24.09 | CD2  | LEU | 84 |
| H | 0.029899  | 64.41 | 73.30 | 23.47 | 1HD2 | LEU | 84 |
| H | 0.054982  | 63.08 | 74.10 | 23.98 | 2HD2 | LEU | 84 |
| H | 0.068910  | 63.96 | 73.20 | 25.03 | 3HD2 | LEU | 84 |
| C | 0.167684  | 61.41 | 69.51 | 24.67 | C    | LEU | 84 |
| O | -0.298797 | 61.66 | 68.80 | 23.69 | O    | LEU | 84 |
| N | -1.007450 | 59.53 | 66.55 | 23.43 | N    | ARG | 87 |
| H | 0.427486  | 59.60 | 67.47 | 23.84 | H    | ARG | 87 |
| C | 0.776721  | 59.55 | 66.41 | 21.98 | CA   | ARG | 87 |
| H | -0.033079 | 58.83 | 65.75 | 21.77 | HA   | ARG | 87 |
| C | -0.236001 | 59.26 | 67.75 | 21.31 | CB   | ARG | 87 |
| H | 0.028741  | 59.53 | 67.70 | 20.35 | HB1  | ARG | 87 |
| H | 0.111192  | 59.80 | 68.46 | 21.76 | HB2  | ARG | 87 |
| C | -0.381165 | 57.81 | 68.14 | 21.38 | CG   | ARG | 87 |
| H | 0.152453  | 57.54 | 68.19 | 22.34 | HG1  | ARG | 87 |
| H | 0.111060  | 57.27 | 67.43 | 20.92 | HG2  | ARG | 87 |
| C | 0.422675  | 57.53 | 69.48 | 20.72 | CD   | ARG | 87 |
| H | -0.045963 | 58.15 | 69.62 | 19.95 | HD1  | ARG | 87 |
| H | 0.003813  | 57.64 | 70.22 | 21.39 | HD2  | ARG | 87 |
| N | -0.868590 | 56.16 | 69.50 | 20.23 | NE   | ARG | 87 |
| H | 0.405842  | 55.43 | 69.73 | 20.88 | HE   | ARG | 87 |
| C | 0.920385  | 55.82 | 69.23 | 18.98 | CZ   | ARG | 87 |
| N | -1.031552 | 56.75 | 68.94 | 18.08 | NH1  | ARG | 87 |
| H | 0.470270  | 57.72 | 68.93 | 18.36 | 1HH1 | ARG | 87 |
| H | 0.438369  | 56.50 | 68.74 | 17.14 | 2HH1 | ARG | 87 |
| N | -1.057156 | 54.54 | 69.21 | 18.63 | NH2  | ARG | 87 |
| H | 0.408583  | 53.83 | 69.39 | 19.31 | 1HH2 | ARG | 87 |
| H | 0.456473  | 54.28 | 69.00 | 17.69 | 2HH2 | ARG | 87 |
| C | -0.127915 | 60.88 | 65.87 | 21.51 | C    | ARG | 87 |
| O | -0.345192 | 61.10 | 65.68 | 20.32 | O    | ARG | 87 |
| N | -0.766842 | 57.98 | 62.45 | 30.48 | N    | PHE | 92 |
| H | 0.359565  | 57.61 | 62.74 | 29.60 | H    | PHE | 92 |
| C | 0.487820  | 57.45 | 63.05 | 31.69 | CA   | PHE | 92 |
| H | 0.016935  | 58.08 | 62.87 | 32.45 | HA   | PHE | 92 |
| C | -0.431544 | 57.26 | 64.56 | 31.50 | CB   | PHE | 92 |
| H | 0.103817  | 56.83 | 64.93 | 32.32 | HB1  | PHE | 92 |
| H | 0.175883  | 56.67 | 64.71 | 30.71 | HB2  | PHE | 92 |
| C | 0.193229  | 58.54 | 65.30 | 31.27 | CG   | PHE | 92 |
| C | -0.143977 | 59.20 | 65.92 | 32.32 | CD1  | PHE | 92 |
| H | 0.118389  | 58.82 | 65.87 | 33.25 | HD1  | PHE | 92 |
| C | -0.170069 | 60.38 | 66.62 | 32.11 | CE1  | PHE | 92 |
| H | 0.140814  | 60.85 | 67.07 | 32.87 | HE1  | PHE | 92 |
| C | -0.178871 | 60.92 | 66.71 | 30.82 | CZ   | PHE | 92 |
| H | 0.123657  | 61.76 | 67.21 | 30.66 | HZ   | PHE | 92 |
| C | -0.068332 | 60.27 | 66.09 | 29.76 | CE2  | PHE | 92 |
| H | 0.137751  | 60.65 | 66.14 | 28.84 | HE2  | PHE | 92 |

|   |           |       |       |       |      |     |    |
|---|-----------|-------|-------|-------|------|-----|----|
| C | -0.165075 | 59.09 | 65.39 | 29.99 | CD2  | PHE | 92 |
| H | 0.122186  | 58.62 | 64.94 | 29.22 | HD2  | PHE | 92 |
| C | 0.103831  | 56.08 | 62.41 | 31.89 | C    | PHE | 92 |
| O | -0.159166 | 55.52 | 61.85 | 30.96 | O    | PHE | 92 |
| N | -0.552624 | 53.55 | 64.14 | 32.57 | N    | GLU | 94 |
| H | 0.424558  | 54.26 | 64.46 | 33.19 | H    | GLU | 94 |
| C | 0.431406  | 52.77 | 65.12 | 31.83 | CA   | GLU | 94 |
| H | 0.031752  | 52.43 | 64.68 | 30.99 | HA   | GLU | 94 |
| C | -0.246481 | 51.60 | 65.58 | 32.68 | CB   | GLU | 94 |
| H | 0.105573  | 51.85 | 66.44 | 33.14 | HB1  | GLU | 94 |
| H | 0.155165  | 51.39 | 64.88 | 33.37 | HB2  | GLU | 94 |
| C | -0.212709 | 50.36 | 65.83 | 31.90 | CG   | GLU | 94 |
| H | 0.050763  | 50.55 | 66.54 | 31.22 | HG1  | GLU | 94 |
| H | 0.167706  | 49.64 | 66.15 | 32.52 | HG2  | GLU | 94 |
| C | 0.598554  | 49.88 | 64.58 | 31.19 | CD   | GLU | 94 |
| O | -0.467097 | 49.42 | 63.65 | 31.88 | OE1  | GLU | 94 |
| O | -0.455200 | 49.98 | 64.54 | 29.94 | OE2  | GLU | 94 |
| C | 0.497630  | 53.68 | 66.30 | 31.49 | C    | GLU | 94 |
| O | -0.515532 | 54.08 | 67.03 | 32.39 | O    | GLU | 94 |
| N | -0.584579 | 53.99 | 66.49 | 30.21 | N    | ALA | 95 |
| H | 0.321444  | 53.61 | 65.87 | 29.52 | H    | ALA | 95 |
| C | 0.288258  | 54.88 | 67.57 | 29.77 | CA   | ALA | 95 |
| H | 0.046041  | 55.45 | 67.71 | 30.58 | HA   | ALA | 95 |
| C | -0.306010 | 55.67 | 67.12 | 28.55 | CB   | ALA | 95 |
| H | 0.087264  | 56.28 | 67.86 | 28.26 | HB1  | ALA | 95 |
| H | 0.117329  | 56.22 | 66.32 | 28.79 | HB2  | ALA | 95 |
| H | 0.089286  | 55.04 | 66.89 | 27.81 | HB3  | ALA | 95 |
| C | 0.492238  | 54.21 | 68.91 | 29.47 | C    | ALA | 95 |
| O | -0.526814 | 54.82 | 69.96 | 29.68 | O    | ALA | 95 |
| N | -0.432453 | 52.98 | 68.89 | 28.96 | N    | VAL | 96 |
| H | 0.284886  | 52.54 | 68.01 | 28.79 | H    | VAL | 96 |
| C | -0.225313 | 52.26 | 70.12 | 28.65 | CA   | VAL | 96 |
| H | 0.132178  | 52.83 | 70.63 | 28.00 | HA   | VAL | 96 |
| C | 0.356028  | 50.91 | 69.79 | 27.99 | CB   | VAL | 96 |
| H | -0.011216 | 50.44 | 69.07 | 28.50 | HB   | VAL | 96 |
| C | -0.416348 | 50.01 | 71.02 | 28.01 | CG1  | VAL | 96 |
| H | 0.145472  | 49.13 | 70.79 | 27.58 | 1HG1 | VAL | 96 |
| H | 0.072711  | 49.85 | 71.31 | 28.95 | 2HG1 | VAL | 96 |
| H | 0.088715  | 50.44 | 71.76 | 27.50 | 3HG1 | VAL | 96 |
| C | -0.275320 | 51.15 | 69.33 | 26.57 | CG2  | VAL | 96 |
| H | 0.071600  | 50.28 | 69.11 | 26.14 | 1HG2 | VAL | 96 |
| H | 0.064569  | 51.62 | 70.05 | 26.06 | 2HG2 | VAL | 96 |
| H | 0.057611  | 51.73 | 68.51 | 26.59 | 3HG2 | VAL | 96 |
| C | 0.643547  | 52.06 | 70.92 | 29.93 | C    | VAL | 96 |
| O | -0.666494 | 51.50 | 70.42 | 30.91 | O    | VAL | 96 |
| N | -0.559673 | 52.49 | 72.18 | 29.91 | N    | TRP | 97 |

|   |           |       |       |       |     |     |    |
|---|-----------|-------|-------|-------|-----|-----|----|
| H | 0.318312  | 52.88 | 72.54 | 29.06 | H   | TRP | 97 |
| C | 0.089324  | 52.43 | 73.03 | 31.08 | CA  | TRP | 97 |
| H | 0.197426  | 53.08 | 72.57 | 31.69 | HA  | TRP | 97 |
| C | -0.382544 | 52.85 | 74.47 | 30.74 | CB  | TRP | 97 |
| H | 0.180861  | 53.67 | 74.43 | 30.16 | HB1 | TRP | 97 |
| H | 0.169750  | 53.07 | 74.96 | 31.58 | HB2 | TRP | 97 |
| C | -0.036953 | 51.82 | 75.27 | 30.01 | CG  | TRP | 97 |
| C | -0.292732 | 51.67 | 75.39 | 28.66 | CD1 | TRP | 97 |
| H | 0.192703  | 52.27 | 74.97 | 27.98 | HD1 | TRP | 97 |
| N | -0.318552 | 50.58 | 76.18 | 28.37 | NE1 | TRP | 97 |
| H | 0.344426  | 50.26 | 76.41 | 27.45 | HE1 | TRP | 97 |
| C | 0.065970  | 50.00 | 76.58 | 29.54 | CE2 | TRP | 97 |
| C | -0.264003 | 48.86 | 77.39 | 29.76 | CZ2 | TRP | 97 |
| H | 0.183974  | 48.34 | 77.76 | 28.99 | HZ2 | TRP | 97 |
| C | -0.130110 | 48.50 | 77.63 | 31.06 | CH2 | TRP | 97 |
| H | 0.110028  | 47.70 | 78.20 | 31.24 | HH2 | TRP | 97 |
| C | -0.185674 | 49.23 | 77.10 | 32.14 | CZ3 | TRP | 97 |
| H | 0.141756  | 48.94 | 77.29 | 33.07 | HZ3 | TRP | 97 |
| C | -0.278881 | 50.36 | 76.30 | 31.92 | CE3 | TRP | 97 |
| H | 0.257771  | 50.88 | 75.92 | 32.69 | HE3 | TRP | 97 |
| C | 0.227555  | 50.75 | 76.03 | 30.60 | CD2 | TRP | 97 |
| C | 0.509279  | 51.09 | 73.05 | 31.82 | C   | TRP | 97 |
| O | -0.501063 | 51.06 | 72.94 | 33.05 | O   | TRP | 97 |
| N | -0.534024 | 49.98 | 73.16 | 31.10 | N   | PHE | 98 |
| H | 0.283407  | 50.04 | 73.21 | 30.10 | H   | PHE | 98 |
| C | 0.355126  | 48.69 | 73.21 | 31.76 | CA  | PHE | 98 |
| H | -0.023446 | 48.90 | 73.71 | 32.60 | HA  | PHE | 98 |
| C | -0.257894 | 47.68 | 73.98 | 30.89 | CB  | PHE | 98 |
| H | 0.105626  | 48.06 | 74.88 | 30.67 | HB1 | PHE | 98 |
| H | 0.033118  | 46.83 | 74.11 | 31.41 | HB2 | PHE | 98 |
| C | 0.141810  | 47.32 | 73.31 | 29.60 | CG  | PHE | 98 |
| C | -0.162095 | 46.38 | 72.28 | 29.57 | CD1 | PHE | 98 |
| H | 0.098846  | 45.96 | 71.97 | 30.43 | HD1 | PHE | 98 |
| C | -0.154584 | 46.00 | 71.68 | 28.37 | CE1 | PHE | 98 |
| H | 0.134736  | 45.33 | 70.94 | 28.36 | HE1 | PHE | 98 |
| C | -0.105944 | 46.58 | 72.10 | 27.17 | CZ  | PHE | 98 |
| H | 0.148402  | 46.31 | 71.67 | 26.30 | HZ  | PHE | 98 |
| C | -0.167806 | 47.53 | 73.13 | 27.18 | CE2 | PHE | 98 |
| H | 0.154545  | 47.94 | 73.44 | 26.32 | HE2 | PHE | 98 |
| C | -0.171240 | 47.89 | 73.73 | 28.40 | CD2 | PHE | 98 |
| H | 0.097450  | 48.57 | 74.46 | 28.41 | HD2 | PHE | 98 |
| C | 0.436976  | 48.14 | 71.85 | 32.19 | C   | PHE | 98 |
| O | -0.586017 | 46.97 | 71.73 | 32.58 | O   | PHE | 98 |
| N | -0.495895 | 49.00 | 70.83 | 32.13 | N   | LYS | 99 |
| H | 0.399190  | 49.93 | 70.98 | 31.80 | H   | LYS | 99 |
| C | 0.353625  | 48.59 | 69.48 | 32.54 | CA  | LYS | 99 |

|   |           |       |       |       |     |     |     |
|---|-----------|-------|-------|-------|-----|-----|-----|
| H | -0.016674 | 47.68 | 69.57 | 32.93 | HA  | LYS | 99  |
| C | -0.356140 | 48.56 | 68.54 | 31.34 | CB  | LYS | 99  |
| H | 0.017997  | 48.27 | 67.63 | 31.64 | HB1 | LYS | 99  |
| H | 0.112239  | 49.48 | 68.48 | 30.95 | HB2 | LYS | 99  |
| C | 0.249844  | 47.61 | 68.99 | 30.25 | CG  | LYS | 99  |
| H | -0.083852 | 48.13 | 69.10 | 29.39 | HG1 | LYS | 99  |
| H | -0.004094 | 47.21 | 69.87 | 30.51 | HG2 | LYS | 99  |
| C | -0.034859 | 46.51 | 68.00 | 30.03 | CD  | LYS | 99  |
| H | -0.005459 | 45.78 | 68.44 | 29.49 | HD1 | LYS | 99  |
| H | 0.015146  | 46.14 | 67.72 | 30.92 | HD2 | LYS | 99  |
| C | -0.100006 | 47.01 | 66.77 | 29.29 | CE  | LYS | 99  |
| H | 0.039313  | 46.27 | 66.10 | 29.23 | HE1 | LYS | 99  |
| H | 0.078222  | 47.78 | 66.38 | 29.79 | HE2 | LYS | 99  |
| N | 0.258399  | 47.46 | 67.11 | 27.90 | NZ  | LYS | 99  |
| H | -0.170251 | 47.78 | 66.28 | 27.45 | HZ1 | LYS | 99  |
| H | -0.074095 | 46.69 | 67.50 | 27.39 | HZ2 | LYS | 99  |
| H | -0.044929 | 48.20 | 67.78 | 27.95 | HZ3 | LYS | 99  |
| C | 0.434066  | 49.56 | 68.95 | 33.59 | C   | LYS | 99  |
| O | -0.598279 | 49.24 | 67.99 | 34.30 | O   | LYS | 99  |
| N | -0.426201 | 50.72 | 69.59 | 33.69 | N   | ALA | 100 |
| H | 0.354199  | 50.89 | 70.37 | 33.08 | H   | ALA | 100 |
| C | 0.231176  | 51.77 | 69.21 | 34.64 | CA  | ALA | 100 |
| H | -0.024545 | 52.07 | 68.32 | 34.30 | HA  | ALA | 100 |
| C | -0.267675 | 52.90 | 70.24 | 34.60 | CB  | ALA | 100 |
| H | 0.004545  | 53.62 | 69.98 | 35.25 | HB1 | ALA | 100 |
| H | 0.112372  | 53.29 | 70.29 | 33.68 | HB2 | ALA | 100 |
| H | 0.152030  | 52.54 | 71.14 | 34.85 | HB3 | ALA | 100 |
| C | 0.474290  | 51.29 | 69.03 | 36.07 | C   | ALA | 100 |
| O | -0.664313 | 51.62 | 68.05 | 36.72 | O   | ALA | 100 |
| N | -0.284638 | 50.50 | 69.97 | 36.57 | N   | GLY | 101 |
| H | 0.304904  | 50.26 | 70.76 | 36.00 | H   | GLY | 101 |
| C | -0.048896 | 50.00 | 69.87 | 37.93 | CA  | GLY | 101 |
| H | 0.097518  | 49.34 | 70.62 | 38.05 | HA1 | GLY | 101 |
| H | 0.024240  | 50.78 | 70.01 | 38.54 | HA2 | GLY | 101 |
| C | 0.527716  | 49.33 | 68.55 | 38.27 | C   | GLY | 101 |
| O | -0.636092 | 49.58 | 67.98 | 39.34 | O   | GLY | 101 |
| N | -0.437411 | 48.50 | 68.04 | 37.37 | N   | SER | 102 |
| H | 0.342887  | 48.35 | 68.53 | 36.51 | H   | SER | 102 |
| C | 0.149779  | 47.78 | 66.80 | 37.61 | CA  | SER | 102 |
| H | -0.006721 | 47.30 | 67.00 | 38.46 | HA  | SER | 102 |
| C | 0.153812  | 46.83 | 66.51 | 36.45 | CB  | SER | 102 |
| H | 0.010067  | 46.29 | 67.32 | 36.22 | HB1 | SER | 102 |
| H | -0.013165 | 46.22 | 65.75 | 36.66 | HB2 | SER | 102 |
| O | -0.544549 | 47.56 | 66.15 | 35.29 | OG  | SER | 102 |
| H | 0.361183  | 46.92 | 65.97 | 34.54 | HG  | SER | 102 |
| C | 0.461975  | 48.65 | 65.56 | 37.87 | C   | SER | 102 |

|   |           |       |       |       |      |     |     |
|---|-----------|-------|-------|-------|------|-----|-----|
| O | -0.578925 | 48.15 | 64.54 | 38.35 | O    | SER | 102 |
| N | -0.463387 | 49.94 | 65.63 | 37.56 | N    | GLN | 103 |
| H | 0.372630  | 50.32 | 66.47 | 37.17 | H    | GLN | 103 |
| C | 0.162726  | 50.81 | 64.47 | 37.79 | CA   | GLN | 103 |
| H | 0.030542  | 50.44 | 63.76 | 37.19 | HA   | GLN | 103 |
| C | 0.108168  | 52.26 | 64.80 | 37.41 | CB   | GLN | 103 |
| H | -0.036346 | 52.82 | 63.98 | 37.57 | HB1  | GLN | 103 |
| H | -0.018021 | 52.58 | 65.54 | 38.00 | HB2  | GLN | 103 |
| C | -0.325591 | 52.46 | 65.21 | 35.98 | CG   | GLN | 103 |
| H | 0.079142  | 51.87 | 66.00 | 35.80 | HG1  | GLN | 103 |
| H | 0.099262  | 52.19 | 64.45 | 35.39 | HG2  | GLN | 103 |
| C | 0.861419  | 53.89 | 65.59 | 35.70 | CD   | GLN | 103 |
| O | -0.654136 | 54.64 | 64.80 | 35.12 | OE1  | GLN | 103 |
| N | -1.061338 | 54.29 | 66.79 | 36.12 | NE2  | GLN | 103 |
| H | 0.481149  | 53.65 | 67.39 | 36.59 | 1HE2 | GLN | 103 |
| H | 0.471521  | 55.23 | 67.09 | 35.95 | 2HE2 | GLN | 103 |
| C | 0.547544  | 50.77 | 64.02 | 39.25 | C    | GLN | 103 |
| O | -0.518002 | 50.91 | 62.82 | 39.54 | O    | GLN | 103 |
| N | -0.803642 | 50.59 | 64.97 | 40.17 | N    | ILE | 104 |
| H | 0.434548  | 50.48 | 65.92 | 39.87 | H    | ILE | 104 |
| C | 0.483301  | 50.54 | 64.64 | 41.58 | CA   | ILE | 104 |
| H | 0.011523  | 51.43 | 64.22 | 41.75 | HA   | ILE | 104 |
| C | 0.010510  | 50.36 | 65.92 | 42.45 | CB   | ILE | 104 |
| H | 0.011348  | 50.93 | 66.66 | 42.09 | HB   | ILE | 104 |
| C | -0.251389 | 48.91 | 66.39 | 42.40 | CG2  | ILE | 104 |
| H | 0.040446  | 48.81 | 67.21 | 42.96 | 1HG2 | ILE | 104 |
| H | 0.129942  | 48.66 | 66.60 | 41.46 | 2HG2 | ILE | 104 |
| H | 0.026400  | 48.32 | 65.67 | 42.76 | 3HG2 | ILE | 104 |
| C | 0.218126  | 50.76 | 65.63 | 43.90 | CG1  | ILE | 104 |
| H | -0.048770 | 50.20 | 64.87 | 44.23 | 1HG1 | ILE | 104 |
| H | -0.056272 | 50.57 | 66.45 | 44.44 | 2HG1 | ILE | 104 |
| C | -0.366964 | 52.25 | 65.25 | 44.08 | CD   | ILE | 104 |
| H | 0.083753  | 52.43 | 65.08 | 45.05 | HD1  | ILE | 104 |
| H | 0.092647  | 52.45 | 64.43 | 43.55 | HD2  | ILE | 104 |
| H | 0.067247  | 52.82 | 66.01 | 43.76 | HD3  | ILE | 104 |
| C | 0.150403  | 49.42 | 63.65 | 41.89 | C    | ILE | 104 |
| O | -0.328921 | 49.46 | 62.97 | 42.93 | O    | ILE | 104 |
| N | -0.734377 | 54.65 | 62.48 | 41.25 | N    | LEU | 110 |
| H | 0.338443  | 54.68 | 62.65 | 42.23 | H    | LEU | 110 |
| C | 0.623876  | 55.37 | 63.35 | 40.34 | CA   | LEU | 110 |
| H | -0.051488 | 55.05 | 63.09 | 39.43 | HA   | LEU | 110 |
| C | -0.485831 | 55.04 | 64.81 | 40.65 | CB   | LEU | 110 |
| H | 0.089636  | 55.58 | 65.08 | 41.45 | HB1  | LEU | 110 |
| H | 0.169389  | 54.07 | 64.86 | 40.88 | HB2  | LEU | 110 |
| C | 0.410828  | 55.32 | 65.84 | 39.55 | CG   | LEU | 110 |
| H | -0.008664 | 54.98 | 65.50 | 38.67 | HG   | LEU | 110 |

|   |           |       |       |       |      |     |     |
|---|-----------|-------|-------|-------|------|-----|-----|
| C | -0.398141 | 54.59 | 67.13 | 39.87 | CD1  | LEU | 110 |
| H | 0.092594  | 54.76 | 67.80 | 39.16 | 1HD1 | LEU | 110 |
| H | 0.088669  | 53.61 | 66.95 | 39.93 | 2HD1 | LEU | 110 |
| H | 0.073212  | 54.92 | 67.48 | 40.75 | 3HD1 | LEU | 110 |
| C | -0.293899 | 56.82 | 66.07 | 39.39 | CD2  | LEU | 110 |
| H | 0.088478  | 56.98 | 66.74 | 38.66 | 1HD2 | LEU | 110 |
| H | 0.065865  | 57.20 | 66.41 | 40.25 | 2HD2 | LEU | 110 |
| H | 0.038629  | 57.27 | 65.21 | 39.15 | 3HD2 | LEU | 110 |
| C | 0.078592  | 56.88 | 63.14 | 40.38 | C    | LEU | 110 |
| O | -0.185812 | 57.54 | 63.48 | 41.36 | O    | LEU | 110 |
| N | -0.764821 | 60.51 | 64.04 | 38.86 | N    | TYR | 112 |
| H | 0.338837  | 60.73 | 63.89 | 39.83 | H    | TYR | 112 |
| C | 0.728258  | 61.24 | 65.04 | 38.11 | CA   | TYR | 112 |
| H | -0.058227 | 60.57 | 65.70 | 37.78 | HA   | TYR | 112 |
| C | -0.475615 | 62.26 | 65.73 | 39.01 | CB   | TYR | 112 |
| H | 0.142375  | 63.07 | 65.14 | 39.10 | HB1  | TYR | 112 |
| H | 0.169305  | 61.85 | 65.86 | 39.92 | HB2  | TYR | 112 |
| C | 0.034902  | 62.73 | 67.07 | 38.51 | CG   | TYR | 112 |
| C | -0.150949 | 61.98 | 68.23 | 38.76 | CD1  | TYR | 112 |
| H | 0.161246  | 61.13 | 68.17 | 39.27 | HD1  | TYR | 112 |
| C | -0.280465 | 62.41 | 69.48 | 38.30 | CE1  | TYR | 112 |
| H | 0.152289  | 61.87 | 70.30 | 38.48 | HE1  | TYR | 112 |
| C | 0.394022  | 63.60 | 69.57 | 37.58 | CZ   | TYR | 112 |
| O | -0.552558 | 64.05 | 70.78 | 37.13 | OH   | TYR | 112 |
| H | 0.401706  | 64.92 | 70.66 | 36.64 | HH   | TYR | 112 |
| C | -0.364292 | 64.36 | 68.43 | 37.33 | CE2  | TYR | 112 |
| H | 0.165144  | 65.21 | 68.50 | 36.81 | HE2  | TYR | 112 |
| C | -0.075757 | 63.92 | 67.19 | 37.79 | CD2  | TYR | 112 |
| H | 0.133877  | 64.46 | 66.38 | 37.61 | HD2  | TYR | 112 |
| C | 0.067087  | 61.95 | 64.39 | 36.91 | C    | TYR | 112 |
| O | -0.166363 | 62.69 | 63.42 | 37.06 | O    | TYR | 112 |
| N | -0.875080 | 50.01 | 66.43 | 47.53 | N    | ILE | 124 |
| H | 0.412034  | 49.30 | 65.75 | 47.36 | H    | ILE | 124 |
| C | 0.684220  | 49.79 | 67.81 | 47.09 | CA   | ILE | 124 |
| H | -0.002648 | 50.62 | 68.03 | 46.57 | HA   | ILE | 124 |
| C | -0.184501 | 48.53 | 67.98 | 46.20 | CB   | ILE | 124 |
| H | 0.074851  | 48.62 | 67.40 | 45.39 | HB   | ILE | 124 |
| C | -0.096647 | 47.28 | 67.56 | 46.94 | CG2  | ILE | 124 |
| H | 0.068111  | 46.49 | 67.67 | 46.34 | 1HG2 | ILE | 124 |
| H | 0.018144  | 47.36 | 66.60 | 47.21 | 2HG2 | ILE | 124 |
| H | -0.014848 | 47.18 | 68.13 | 47.75 | 3HG2 | ILE | 124 |
| C | 0.168219  | 48.35 | 69.44 | 45.79 | CG1  | ILE | 124 |
| H | -0.020683 | 48.25 | 69.99 | 46.62 | 1HG1 | ILE | 124 |
| H | 0.001974  | 47.52 | 69.52 | 45.24 | 2HG1 | ILE | 124 |
| C | -0.316889 | 49.51 | 70.03 | 44.98 | CD   | ILE | 124 |
| H | 0.086638  | 49.31 | 70.98 | 44.76 | HD1  | ILE | 124 |



|   |           |       |       |       |      |     |     |
|---|-----------|-------|-------|-------|------|-----|-----|
| H | 0.050730  | 50.35 | 69.97 | 45.51 | HD2  | ILE | 124 |
| H | 0.079583  | 49.62 | 69.50 | 44.13 | HD3  | ILE | 124 |
| C | 0.118232  | 49.67 | 68.72 | 48.32 | C    | ILE | 124 |
| O | -0.251440 | 50.09 | 69.88 | 48.28 | O    | ILE | 124 |
| N | -0.883288 | 53.10 | 69.60 | 49.40 | N    | ILE | 127 |
| H | 0.409004  | 52.52 | 68.86 | 49.07 | H    | ILE | 127 |
| C | 0.696230  | 53.69 | 70.54 | 48.45 | CA   | ILE | 127 |
| H | 0.013210  | 54.68 | 70.47 | 48.57 | HA   | ILE | 127 |
| C | -0.344748 | 53.31 | 70.19 | 47.00 | CB   | ILE | 127 |
| H | 0.088982  | 52.31 | 70.13 | 46.91 | HB   | ILE | 127 |
| C | -0.181745 | 53.79 | 71.30 | 46.06 | CG2  | ILE | 127 |
| H | 0.089749  | 53.54 | 71.07 | 45.12 | 1HG2 | ILE | 127 |
| H | 0.032506  | 53.36 | 72.16 | 46.32 | 2HG2 | ILE | 127 |
| H | 0.057376  | 54.79 | 71.38 | 46.13 | 3HG2 | ILE | 127 |
| C | 0.372070  | 53.89 | 68.83 | 46.62 | CG1  | ILE | 127 |
| H | -0.112528 | 53.50 | 68.14 | 47.23 | 1HG1 | ILE | 127 |
| H | -0.060808 | 54.88 | 68.87 | 46.75 | 2HG1 | ILE | 127 |
| C | -0.149758 | 53.61 | 68.41 | 45.18 | CD   | ILE | 127 |
| H | 0.034017  | 54.02 | 67.52 | 45.01 | HD1  | ILE | 127 |
| H | 0.033593  | 52.62 | 68.36 | 45.04 | HD2  | ILE | 127 |
| H | 0.018286  | 54.00 | 69.09 | 44.56 | HD3  | ILE | 127 |
| C | 0.176473  | 53.13 | 71.92 | 48.76 | C    | ILE | 127 |
| O | -0.288622 | 53.87 | 72.90 | 48.87 | O    | ILE | 127 |
| N | -0.810117 | 55.11 | 75.41 | 50.27 | N    | GLN | 131 |
| H | 0.430779  | 54.50 | 74.65 | 50.03 | H    | GLN | 131 |
| C | 0.618641  | 55.08 | 76.62 | 49.47 | CA   | GLN | 131 |
| H | 0.037464  | 56.04 | 76.78 | 49.25 | HA   | GLN | 131 |
| C | -0.145741 | 54.25 | 76.42 | 48.21 | CB   | GLN | 131 |
| H | 0.027310  | 53.28 | 76.39 | 48.46 | HB1  | GLN | 131 |
| H | 0.095013  | 54.51 | 75.55 | 47.79 | HB2  | GLN | 131 |
| C | -0.192438 | 54.45 | 77.54 | 47.19 | CG   | GLN | 131 |
| H | 0.030895  | 55.40 | 77.51 | 46.86 | HG1  | GLN | 131 |
| H | 0.029010  | 54.28 | 78.41 | 47.63 | HG2  | GLN | 131 |
| C | 0.832044  | 53.54 | 77.43 | 45.99 | CD   | GLN | 131 |
| O | -0.609145 | 53.45 | 76.39 | 45.34 | OE1  | GLN | 131 |
| N | -1.051982 | 52.85 | 78.52 | 45.67 | NE2  | GLN | 131 |
| H | 0.458627  | 52.95 | 79.35 | 46.22 | 1HE2 | GLN | 131 |
| H | 0.471361  | 52.23 | 78.51 | 44.89 | 2HE2 | GLN | 131 |
| C | 0.082622  | 54.55 | 77.81 | 50.25 | C    | GLN | 131 |
| O | -0.304343 | 54.99 | 78.95 | 50.03 | O    | GLN | 131 |
| N | -0.901365 | 57.40 | 80.54 | 50.43 | N    | MET | 135 |
| H | 0.442833  | 56.80 | 79.75 | 50.35 | H    | MET | 135 |
| C | 0.812335  | 57.10 | 81.76 | 49.69 | CA   | MET | 135 |
| H | -0.023523 | 57.97 | 82.00 | 49.23 | HA   | MET | 135 |
| C | -0.287246 | 56.01 | 81.53 | 48.64 | CB   | MET | 135 |
| H | 0.073518  | 55.71 | 82.42 | 48.29 | HB1  | MET | 135 |

|   |           |       |       |       |      |     |     |
|---|-----------|-------|-------|-------|------|-----|-----|
| H | 0.088563  | 55.24 | 81.07 | 49.08 | HB2  | MET | 135 |
| C | -0.109137 | 56.44 | 80.70 | 47.45 | CG   | MET | 135 |
| H | 0.147696  | 55.67 | 80.76 | 46.81 | HG1  | MET | 135 |
| H | 0.137333  | 56.49 | 79.77 | 47.81 | HG2  | MET | 135 |
| S | -0.312721 | 57.99 | 81.24 | 46.69 | SD   | MET | 135 |
| C | -0.164160 | 57.52 | 82.87 | 46.07 | CE   | MET | 135 |
| H | 0.134783  | 58.31 | 83.29 | 45.62 | HE1  | MET | 135 |
| H | 0.087583  | 56.77 | 82.77 | 45.42 | HE2  | MET | 135 |
| H | 0.069469  | 57.23 | 83.44 | 46.84 | HE3  | MET | 135 |
| C | 0.042723  | 56.68 | 82.88 | 50.63 | C    | MET | 135 |
| O | -0.238685 | 57.05 | 84.04 | 50.45 | O    | MET | 135 |
| N | -0.918024 | 69.08 | 87.91 | 53.40 | N    | LEU | 148 |
| H | 0.440225  | 68.08 | 87.94 | 53.34 | H    | LEU | 148 |
| C | 0.764434  | 69.87 | 88.27 | 52.23 | CA   | LEU | 148 |
| H | -0.044992 | 70.78 | 87.93 | 52.49 | HA   | LEU | 148 |
| C | -0.246288 | 69.31 | 87.60 | 50.98 | CB   | LEU | 148 |
| H | 0.050568  | 69.74 | 88.01 | 50.18 | HB1  | LEU | 148 |
| H | 0.070390  | 68.32 | 87.77 | 50.96 | HB2  | LEU | 148 |
| C | 0.317357  | 69.53 | 86.08 | 50.93 | CG   | LEU | 148 |
| H | -0.000685 | 69.05 | 85.64 | 51.69 | HG   | LEU | 148 |
| C | -0.341790 | 68.98 | 85.52 | 49.63 | CD1  | LEU | 148 |
| H | 0.090581  | 69.13 | 84.53 | 49.60 | 1HD1 | LEU | 148 |
| H | 0.073024  | 68.00 | 85.71 | 49.57 | 2HD1 | LEU | 148 |
| H | 0.102297  | 69.45 | 85.95 | 48.85 | 3HD1 | LEU | 148 |
| C | -0.473465 | 71.01 | 85.80 | 51.04 | CD2  | LEU | 148 |
| H | 0.132495  | 71.16 | 84.81 | 51.00 | 1HD2 | LEU | 148 |
| H | 0.095705  | 71.49 | 86.23 | 50.28 | 2HD2 | LEU | 148 |
| H | 0.106257  | 71.36 | 86.15 | 51.91 | 3HD2 | LEU | 148 |
| C | 0.019928  | 70.04 | 89.76 | 51.98 | C    | LEU | 148 |
| O | -0.238016 | 70.45 | 90.16 | 50.89 | O    | LEU | 148 |
| N | -0.724883 | 62.86 | 97.22 | 44.06 | N    | LEU | 155 |
| H | 0.348963  | 63.04 | 98.20 | 43.97 | H    | LEU | 155 |
| C | 0.540553  | 62.96 | 96.36 | 42.90 | CA   | LEU | 155 |
| H | -0.074189 | 62.49 | 95.54 | 43.22 | HA   | LEU | 155 |
| C | -0.441759 | 62.30 | 97.02 | 41.69 | CB   | LEU | 155 |
| H | 0.102404  | 62.50 | 96.45 | 40.89 | HB1  | LEU | 155 |
| H | 0.091132  | 62.72 | 97.92 | 41.57 | HB2  | LEU | 155 |
| C | 0.515551  | 60.79 | 97.23 | 41.73 | CG   | LEU | 155 |
| H | -0.059766 | 60.53 | 97.74 | 42.54 | HG   | LEU | 155 |
| C | -0.439891 | 60.36 | 98.02 | 40.49 | CD1  | LEU | 155 |
| H | 0.070452  | 59.37 | 98.15 | 40.51 | 1HD1 | LEU | 155 |
| H | 0.081026  | 60.82 | 98.90 | 40.49 | 2HD1 | LEU | 155 |
| H | 0.142384  | 60.61 | 97.51 | 39.67 | 3HD1 | LEU | 155 |
| C | -0.548033 | 60.09 | 95.87 | 41.77 | CD2  | LEU | 155 |
| H | 0.093713  | 59.10 | 96.01 | 41.80 | 1HD2 | LEU | 155 |
| H | 0.152949  | 60.34 | 95.35 | 40.96 | 2HD2 | LEU | 155 |

|   |           |       |       |       |      |     |     |
|---|-----------|-------|-------|-------|------|-----|-----|
| H | 0.158260  | 60.38 | 95.38 | 42.59 | 3HD2 | LEU | 155 |
| C | 0.476975  | 64.37 | 95.94 | 42.50 | C    | LEU | 155 |
| O | -0.493710 | 64.55 | 94.90 | 41.87 | O    | LEU | 155 |
| N | -0.718638 | 65.36 | 96.75 | 42.85 | N    | TYR | 156 |
| H | 0.344425  | 65.16 | 97.56 | 43.39 | H    | TYR | 156 |
| C | 0.476314  | 66.74 | 96.46 | 42.47 | CA   | TYR | 156 |
| H | -0.018860 | 66.72 | 95.57 | 42.02 | HA   | TYR | 156 |
| C | 0.263877  | 67.21 | 97.57 | 41.53 | CB   | TYR | 156 |
| H | -0.091797 | 68.11 | 97.33 | 41.16 | HB1  | TYR | 156 |
| H | -0.084281 | 67.27 | 98.42 | 42.04 | HB2  | TYR | 156 |
| C | -0.166740 | 66.27 | 97.79 | 40.36 | CG   | TYR | 156 |
| C | -0.112562 | 66.26 | 96.91 | 39.27 | CD1  | TYR | 156 |
| H | 0.171244  | 66.89 | 96.14 | 39.26 | HD1  | TYR | 156 |
| C | -0.269730 | 65.38 | 97.10 | 38.19 | CE1  | TYR | 156 |
| H | 0.209823  | 65.39 | 96.47 | 37.42 | HE1  | TYR | 156 |
| C | 0.459999  | 64.50 | 98.18 | 38.21 | CZ   | TYR | 156 |
| O | -0.564121 | 63.65 | 98.38 | 37.15 | OH   | TYR | 156 |
| H | 0.395992  | 63.09 | 99.19 | 37.32 | HH   | TYR | 156 |
| C | -0.400136 | 64.49 | 99.06 | 39.28 | CE2  | TYR | 156 |
| H | 0.168549  | 63.85 | 99.83 | 39.30 | HE2  | TYR | 156 |
| C | -0.090999 | 65.37 | 98.86 | 40.35 | CD2  | TYR | 156 |
| H | 0.127571  | 65.36 | 99.49 | 41.12 | HD2  | TYR | 156 |
| C | 0.314506  | 67.70 | 96.34 | 43.66 | C    | TYR | 156 |
| O | -0.561001 | 68.62 | 97.14 | 43.83 | O    | TYR | 156 |
| N | -0.090162 | 67.51 | 95.30 | 44.49 | N    | PRO | 157 |
| C | -0.211667 | 66.55 | 94.21 | 44.25 | CD   | PRO | 157 |
| H | 0.154202  | 66.89 | 93.57 | 43.56 | HD1  | PRO | 157 |
| H | 0.127739  | 65.66 | 94.57 | 43.94 | HD2  | PRO | 157 |
| C | 0.114855  | 66.45 | 93.57 | 45.60 | CG   | PRO | 157 |
| H | 0.004321  | 66.13 | 92.63 | 45.54 | HG1  | PRO | 157 |
| H | -0.009156 | 65.85 | 94.09 | 46.21 | HG2  | PRO | 157 |
| C | -0.114342 | 67.82 | 93.61 | 46.09 | CB   | PRO | 157 |
| H | 0.067445  | 68.36 | 92.89 | 45.65 | HB1  | PRO | 157 |
| H | 0.009951  | 67.84 | 93.49 | 47.08 | HB2  | PRO | 157 |
| C | 0.086780  | 68.30 | 95.00 | 45.68 | CA   | PRO | 157 |
| H | 0.037768  | 68.14 | 95.74 | 46.34 | HA   | PRO | 157 |
| C | 0.477247  | 69.81 | 95.03 | 45.49 | C    | PRO | 157 |
| O | -0.512894 | 70.53 | 95.69 | 46.23 | O    | PRO | 157 |
| N | -0.340855 | 70.29 | 94.29 | 44.50 | N    | GLY | 158 |
| H | 0.302003  | 69.67 | 93.78 | 43.90 | H    | GLY | 158 |
| C | -0.225625 | 71.72 | 94.20 | 44.29 | CA   | GLY | 158 |
| H | 0.166743  | 72.11 | 95.12 | 44.33 | HA1  | GLY | 158 |
| H | 0.126981  | 71.90 | 93.81 | 43.39 | HA2  | GLY | 158 |
| C | 0.471522  | 72.28 | 93.32 | 45.39 | C    | GLY | 158 |
| O | -0.562195 | 71.59 | 92.44 | 45.90 | O    | GLY | 158 |
| N | -0.388487 | 73.54 | 93.54 | 45.75 | N    | GLY | 159 |

|   |           |       |       |       |     |     |     |
|---|-----------|-------|-------|-------|-----|-----|-----|
| H | 0.294318  | 74.06 | 94.27 | 45.30 | H   | GLY | 159 |
| C | -0.204902 | 74.17 | 92.75 | 46.80 | CA  | GLY | 159 |
| H | 0.183613  | 73.70 | 92.96 | 47.65 | HA1 | GLY | 159 |
| H | 0.131201  | 75.12 | 93.04 | 46.86 | HA2 | GLY | 159 |
| C | 0.542635  | 74.10 | 91.26 | 46.53 | C   | GLY | 159 |
| O | -0.619429 | 74.66 | 90.77 | 45.56 | O   | GLY | 159 |
| N | -0.379320 | 73.43 | 90.54 | 47.42 | N   | SER | 160 |
| H | 0.296345  | 73.00 | 91.00 | 48.20 | H   | SER | 160 |
| C | -0.062296 | 73.29 | 89.10 | 47.27 | CA  | SER | 160 |
| H | 0.089833  | 74.23 | 88.74 | 47.26 | HA  | SER | 160 |
| C | 0.325303  | 72.49 | 88.52 | 48.43 | CB  | SER | 160 |
| H | -0.036072 | 72.39 | 87.53 | 48.33 | HB1 | SER | 160 |
| H | 0.021334  | 71.59 | 88.94 | 48.49 | HB2 | SER | 160 |
| O | -0.659180 | 73.15 | 88.75 | 49.66 | OG  | SER | 160 |
| H | 0.392896  | 72.61 | 88.36 | 50.41 | HG  | SER | 160 |
| C | 0.517775  | 72.59 | 88.78 | 45.96 | C   | SER | 160 |
| O | -0.590555 | 72.75 | 87.68 | 45.43 | O   | SER | 160 |
| N | -0.487807 | 71.83 | 89.73 | 45.44 | N   | PHE | 161 |
| H | 0.373321  | 71.75 | 90.62 | 45.90 | H   | PHE | 161 |
| C | 0.365582  | 71.10 | 89.50 | 44.21 | CA  | PHE | 161 |
| H | 0.000752  | 71.15 | 88.50 | 44.15 | HA  | PHE | 161 |
| C | -0.576540 | 69.67 | 90.02 | 44.34 | CB  | PHE | 161 |
| H | 0.147779  | 69.21 | 89.91 | 43.46 | HB1 | PHE | 161 |
| H | 0.201130  | 69.71 | 90.99 | 44.58 | HB2 | PHE | 161 |
| C | 0.297803  | 68.87 | 89.30 | 45.39 | CG  | PHE | 161 |
| C | -0.332893 | 68.84 | 89.75 | 46.70 | CD1 | PHE | 161 |
| H | 0.167474  | 69.32 | 90.60 | 46.94 | HD1 | PHE | 161 |
| C | -0.069537 | 68.15 | 89.05 | 47.70 | CE1 | PHE | 161 |
| H | 0.110811  | 68.14 | 89.39 | 48.64 | HE1 | PHE | 161 |
| C | -0.220745 | 67.48 | 87.88 | 47.38 | CZ  | PHE | 161 |
| H | 0.129197  | 66.98 | 87.38 | 48.09 | HZ  | PHE | 161 |
| C | -0.101231 | 67.50 | 87.42 | 46.07 | CE2 | PHE | 161 |
| H | 0.129068  | 67.02 | 86.57 | 45.83 | HE2 | PHE | 161 |
| C | -0.183661 | 68.19 | 88.13 | 45.08 | CD2 | PHE | 161 |
| H | 0.159230  | 68.20 | 87.79 | 44.14 | HD2 | PHE | 161 |
| C | 0.383487  | 71.76 | 89.98 | 42.92 | C   | PHE | 161 |
| O | -0.461385 | 71.12 | 90.02 | 41.87 | O   | PHE | 161 |
| N | -0.605990 | 73.04 | 90.34 | 43.00 | N   | ASH | 162 |
| H | 0.430752  | 73.49 | 90.34 | 43.90 | H   | ASH | 162 |
| C | 0.243859  | 73.82 | 90.72 | 41.82 | CA  | ASH | 162 |
| H | -0.073351 | 73.39 | 90.28 | 41.04 | HA  | ASH | 162 |
| C | 0.001349  | 73.80 | 92.24 | 41.57 | CB  | ASH | 162 |
| H | 0.040322  | 74.25 | 92.69 | 42.33 | HB1 | ASH | 162 |
| H | 0.103398  | 72.84 | 92.54 | 41.52 | HB2 | ASH | 162 |
| C | 0.605581  | 74.52 | 92.64 | 40.25 | CG  | ASH | 162 |
| O | -0.645590 | 74.63 | 91.78 | 39.33 | OD1 | ASH | 162 |

---

|   |           |       |       |       |      |     |     |
|---|-----------|-------|-------|-------|------|-----|-----|
| O | -0.513232 | 74.96 | 93.81 | 40.13 | OD2  | ASH | 162 |
| H | 0.430000  | 75.39 | 93.91 | 39.23 | HD2  | ASH | 162 |
| C | 0.377514  | 75.25 | 90.24 | 42.04 | C    | ASH | 162 |
| O | -0.522304 | 76.20 | 91.02 | 41.96 | O    | ASH | 162 |
| N | -0.267735 | 75.41 | 88.94 | 42.32 | N    | PRO | 163 |
| C | -0.113746 | 74.33 | 87.95 | 42.33 | CD   | PRO | 163 |
| H | 0.024302  | 74.05 | 87.71 | 41.40 | HD1  | PRO | 163 |
| H | 0.140153  | 73.54 | 88.29 | 42.84 | HD2  | PRO | 163 |
| C | 0.237668  | 74.98 | 86.78 | 43.03 | CG   | PRO | 163 |
| H | -0.035812 | 74.52 | 85.92 | 42.80 | HG1  | PRO | 163 |
| H | -0.000611 | 74.97 | 86.90 | 44.02 | HG2  | PRO | 163 |
| C | -0.165260 | 76.36 | 86.81 | 42.50 | CB   | PRO | 163 |
| H | 0.067067  | 76.39 | 86.46 | 41.56 | HB1  | PRO | 163 |
| H | 0.005962  | 76.97 | 86.26 | 43.07 | HB2  | PRO | 163 |
| C | 0.137481  | 76.70 | 88.29 | 42.56 | CA   | PRO | 163 |
| H | 0.090454  | 77.08 | 88.60 | 43.43 | HA   | PRO | 163 |
| C | 0.517838  | 77.77 | 88.66 | 41.54 | C    | PRO | 163 |
| O | -0.502458 | 78.85 | 89.11 | 41.90 | O    | PRO | 163 |
| N | -0.512973 | 77.46 | 88.47 | 40.27 | N    | LEU | 164 |
| H | 0.266613  | 76.56 | 88.10 | 40.03 | H    | LEU | 164 |
| C | 0.173565  | 78.40 | 88.78 | 39.21 | CA   | LEU | 164 |
| H | 0.037822  | 79.25 | 88.36 | 39.52 | HA   | LEU | 164 |
| C | -0.279837 | 77.92 | 88.17 | 37.89 | CB   | LEU | 164 |
| H | 0.084496  | 78.59 | 88.40 | 37.18 | HB1  | LEU | 164 |
| H | 0.034921  | 77.03 | 88.57 | 37.66 | HB2  | LEU | 164 |
| C | 0.413835  | 77.77 | 86.65 | 37.91 | CG   | LEU | 164 |
| H | -0.055748 | 77.07 | 86.39 | 38.58 | HG   | LEU | 164 |
| C | -0.343546 | 77.34 | 86.15 | 36.53 | CD1  | LEU | 164 |
| H | 0.108080  | 77.24 | 85.16 | 36.55 | 1HD1 | LEU | 164 |
| H | -0.025067 | 76.46 | 86.57 | 36.28 | 2HD1 | LEU | 164 |
| H | 0.121857  | 78.03 | 86.40 | 35.86 | 3HD1 | LEU | 164 |
| C | -0.515444 | 79.08 | 86.01 | 38.32 | CD2  | LEU | 164 |
| H | 0.133826  | 78.98 | 85.02 | 38.34 | 1HD2 | LEU | 164 |
| H | 0.136009  | 79.79 | 86.26 | 37.67 | 2HD2 | LEU | 164 |
| H | 0.153139  | 79.34 | 86.34 | 39.23 | 3HD2 | LEU | 164 |
| C | 0.352429  | 78.63 | 90.27 | 39.02 | C    | LEU | 164 |
| O | -0.506591 | 79.40 | 90.67 | 38.16 | O    | LEU | 164 |
| N | -0.239572 | 77.95 | 91.08 | 39.83 | N    | GLY | 165 |
| H | 0.321162  | 77.33 | 90.69 | 40.51 | H    | GLY | 165 |
| C | -0.277897 | 78.09 | 92.52 | 39.74 | CA   | GLY | 165 |
| H | 0.125675  | 79.02 | 92.75 | 40.04 | HA1  | GLY | 165 |
| H | 0.138552  | 77.43 | 92.92 | 40.38 | HA2  | GLY | 165 |
| C | 0.489405  | 77.85 | 93.11 | 38.36 | C    | GLY | 165 |
| O | -0.568630 | 78.52 | 94.06 | 37.97 | O    | GLY | 165 |
| N | -0.492730 | 76.89 | 92.57 | 37.63 | N    | LEU | 166 |
| H | 0.325885  | 76.35 | 91.81 | 38.00 | H    | LEU | 166 |

---

|   |           |       |        |       |      |     |     |
|---|-----------|-------|--------|-------|------|-----|-----|
| C | -0.050032 | 76.60 | 93.05  | 36.28 | CA   | LEU | 166 |
| H | 0.114839  | 77.49 | 93.06  | 35.84 | HA   | LEU | 166 |
| C | -0.047576 | 75.61 | 92.12  | 35.58 | CB   | LEU | 166 |
| H | 0.031649  | 75.39 | 92.52  | 34.69 | HB1  | LEU | 166 |
| H | 0.016367  | 74.78 | 92.07  | 36.14 | HB2  | LEU | 166 |
| C | 0.473502  | 76.08 | 90.68  | 35.33 | CG   | LEU | 166 |
| H | -0.079075 | 76.13 | 90.19  | 36.20 | HG   | LEU | 166 |
| C | -0.477762 | 75.09 | 89.96  | 34.42 | CD1  | LEU | 166 |
| H | 0.085564  | 75.41 | 89.03  | 34.26 | 1HD1 | LEU | 166 |
| H | 0.051026  | 74.19 | 89.94  | 34.86 | 2HD1 | LEU | 166 |
| H | 0.159983  | 75.03 | 90.45  | 33.55 | 3HD1 | LEU | 166 |
| C | -0.603282 | 77.45 | 90.71  | 34.69 | CD2  | LEU | 166 |
| H | 0.131026  | 77.76 | 89.78  | 34.52 | 1HD2 | LEU | 166 |
| H | 0.123473  | 77.40 | 91.21  | 33.82 | 2HD2 | LEU | 166 |
| H | 0.221480  | 78.09 | 91.17  | 35.30 | 3HD2 | LEU | 166 |
| C | 0.441830  | 76.03 | 94.46  | 36.27 | C    | LEU | 166 |
| O | -0.518876 | 76.03 | 95.12  | 35.23 | O    | LEU | 166 |
| N | -0.454016 | 75.55 | 94.93  | 37.42 | N    | ALA | 167 |
| H | 0.223675  | 75.59 | 94.36  | 38.24 | H    | ALA | 167 |
| C | 0.389104  | 74.97 | 96.26  | 37.49 | CA   | ALA | 167 |
| H | 0.000736  | 74.95 | 96.55  | 36.53 | HA   | ALA | 167 |
| C | -0.467212 | 73.58 | 96.17  | 38.10 | CB   | ALA | 167 |
| H | 0.101974  | 73.17 | 97.08  | 38.15 | HB1  | ALA | 167 |
| H | 0.102600  | 73.00 | 95.58  | 37.53 | HB2  | ALA | 167 |
| H | 0.121615  | 73.64 | 95.78  | 39.02 | HB3  | ALA | 167 |
| C | 0.454883  | 75.80 | 97.30  | 38.24 | C    | ALA | 167 |
| O | -0.502361 | 75.27 | 98.33  | 38.67 | O    | ALA | 167 |
| N | -0.635395 | 77.10 | 97.05  | 38.41 | N    | ASH | 168 |
| H | 0.423992  | 77.49 | 96.21  | 38.04 | H    | ASH | 168 |
| C | 0.454153  | 77.94 | 98.00  | 39.13 | CA   | ASH | 168 |
| H | 0.095310  | 77.44 | 98.18  | 39.97 | HA   | ASH | 168 |
| C | -0.577234 | 79.30 | 97.37  | 39.44 | CB   | ASH | 168 |
| H | 0.206812  | 79.85 | 98.04  | 39.93 | HB1  | ASH | 168 |
| H | 0.196436  | 79.75 | 97.14  | 38.57 | HB2  | ASH | 168 |
| C | 0.681343  | 79.18 | 96.11  | 40.28 | CG   | ASH | 168 |
| O | -0.572966 | 78.38 | 96.11  | 41.24 | OD1  | ASH | 168 |
| O | -0.457059 | 79.89 | 95.12  | 39.98 | OD2  | ASH | 168 |
| H | 0.410501  | 79.70 | 94.37  | 40.62 | HD2  | ASH | 168 |
| C | 0.017093  | 78.13 | 99.31  | 38.37 | C    | ASH | 168 |
| O | -0.244248 | 78.22 | 100.37 | 38.98 | O    | ASH | 168 |
| N | -0.825901 | 73.87 | 99.57  | 34.12 | N    | PHE | 173 |
| H | 0.390861  | 74.61 | 100.12 | 34.51 | H    | PHE | 173 |
| C | 0.735659  | 72.72 | 99.26  | 34.94 | CA   | PHE | 173 |
| H | 0.023078  | 72.65 | 98.27  | 35.00 | HA   | PHE | 173 |
| C | -0.767549 | 72.92 | 99.86  | 36.34 | CB   | PHE | 173 |
| H | 0.174853  | 72.93 | 100.86 | 36.26 | HB1  | PHE | 173 |

|   |           |       |        |       |      |     |     |
|---|-----------|-------|--------|-------|------|-----|-----|
| H | 0.278773  | 73.79 | 99.55  | 36.70 | HB2  | PHE | 173 |
| C | 0.258783  | 71.85 | 99.50  | 37.32 | CG   | PHE | 173 |
| C | -0.196925 | 71.15 | 98.30  | 37.21 | CD1  | PHE | 173 |
| H | 0.120482  | 71.33 | 97.69  | 36.44 | HD1  | PHE | 173 |
| C | -0.170962 | 70.21 | 97.93  | 38.17 | CE1  | PHE | 173 |
| H | 0.147486  | 69.72 | 97.06  | 38.08 | HE1  | PHE | 173 |
| C | -0.102110 | 69.96 | 98.77  | 39.25 | CZ   | PHE | 173 |
| H | 0.141348  | 69.28 | 98.50  | 39.95 | HZ   | PHE | 173 |
| C | -0.154915 | 70.64 | 99.97  | 39.37 | CE2  | PHE | 173 |
| H | 0.144358  | 70.46 | 100.57 | 40.14 | HE2  | PHE | 173 |
| C | -0.186772 | 71.58 | 100.33 | 38.41 | CD2  | PHE | 173 |
| H | 0.153005  | 72.07 | 101.19 | 38.49 | HD2  | PHE | 173 |
| C | 0.139718  | 71.45 | 99.83  | 34.30 | C    | PHE | 173 |
| O | -0.303271 | 70.44 | 99.13  | 34.16 | O    | PHE | 173 |
| N | -0.726461 | 70.59 | 97.64  | 31.22 | N    | LEU | 176 |
| H | 0.367238  | 71.41 | 98.02  | 31.65 | H    | LEU | 176 |
| C | 0.493729  | 70.15 | 96.30  | 31.59 | CA   | LEU | 176 |
| H | -0.055816 | 70.20 | 95.75  | 30.76 | HA   | LEU | 176 |
| C | -0.112476 | 71.08 | 95.71  | 32.66 | CB   | LEU | 176 |
| H | -0.042505 | 70.60 | 94.94  | 33.09 | HB1  | LEU | 176 |
| H | 0.017749  | 71.23 | 96.43  | 33.35 | HB2  | LEU | 176 |
| C | 0.466033  | 72.45 | 95.21  | 32.19 | CG   | LEU | 176 |
| H | -0.031050 | 72.89 | 95.90  | 31.61 | HG   | LEU | 176 |
| C | -0.602198 | 73.38 | 94.97  | 33.37 | CD1  | LEU | 176 |
| H | 0.172528  | 74.26 | 94.64  | 33.04 | 1HD1 | LEU | 176 |
| H | 0.110656  | 73.51 | 95.82  | 33.88 | 2HD1 | LEU | 176 |
| H | 0.177847  | 72.97 | 94.28  | 33.97 | 3HD1 | LEU | 176 |
| C | -0.521896 | 72.26 | 93.94  | 31.38 | CD2  | LEU | 176 |
| H | 0.127572  | 73.15 | 93.61  | 31.07 | 1HD2 | LEU | 176 |
| H | 0.117223  | 71.83 | 93.24  | 31.95 | 2HD2 | LEU | 176 |
| H | 0.120392  | 71.68 | 94.13  | 30.59 | 3HD2 | LEU | 176 |
| C | 0.511652  | 68.71 | 96.34  | 32.09 | C    | LEU | 176 |
| O | -0.602335 | 67.93 | 95.41  | 31.84 | O    | LEU | 176 |
| N | -0.541714 | 68.35 | 97.42  | 32.78 | N    | LYS | 177 |
| H | 0.347446  | 69.02 | 98.15  | 32.94 | H    | LYS | 177 |
| C | 0.030953  | 66.99 | 97.56  | 33.29 | CA   | LYS | 177 |
| H | 0.136775  | 66.85 | 96.77  | 33.88 | HA   | LYS | 177 |
| C | -0.082302 | 66.84 | 98.85  | 34.10 | CB   | LYS | 177 |
| H | 0.023559  | 65.87 | 99.08  | 34.15 | HB1  | LYS | 177 |
| H | 0.020726  | 67.33 | 99.58  | 33.61 | HB2  | LYS | 177 |
| C | 0.236565  | 67.38 | 98.79  | 35.50 | CG   | LYS | 177 |
| H | -0.017669 | 68.37 | 98.64  | 35.47 | HG1  | LYS | 177 |
| H | -0.045475 | 66.94 | 98.04  | 35.99 | HG2  | LYS | 177 |
| C | 0.125305  | 67.09 | 100.10 | 36.21 | CD   | LYS | 177 |
| H | -0.044352 | 66.10 | 100.26 | 36.21 | HD1  | LYS | 177 |
| H | -0.058331 | 67.55 | 100.84 | 35.73 | HD2  | LYS | 177 |

|   |           |       |        |       |      |     |     |
|---|-----------|-------|--------|-------|------|-----|-----|
| C | -0.275886 | 67.58 | 100.07 | 37.64 | CE   | LYS | 177 |
| H | 0.092926  | 68.54 | 99.78  | 37.64 | HE1  | LYS | 177 |
| H | 0.118111  | 67.03 | 99.40  | 38.15 | HE2  | LYS | 177 |
| N | 0.459234  | 67.47 | 101.39 | 38.32 | NZ   | LYS | 177 |
| H | -0.124316 | 67.81 | 101.31 | 39.26 | HZ1  | LYS | 177 |
| H | -0.153857 | 68.02 | 102.06 | 37.82 | HZ2  | LYS | 177 |
| H | -0.181866 | 66.51 | 101.68 | 38.33 | HZ3  | LYS | 177 |
| C | 0.556360  | 65.98 | 97.57  | 32.15 | C    | LYS | 177 |
| O | -0.598463 | 64.93 | 96.94  | 32.24 | O    | LYS | 177 |
| N | -0.442397 | 66.31 | 98.29  | 31.07 | N    | VAL | 178 |
| H | 0.291257  | 67.18 | 98.79  | 31.07 | H    | VAL | 178 |
| C | -0.183946 | 65.45 | 98.37  | 29.89 | CA   | VAL | 178 |
| H | 0.108765  | 64.58 | 98.73  | 30.23 | HA   | VAL | 178 |
| C | 0.421801  | 66.05 | 99.31  | 28.81 | CB   | VAL | 178 |
| H | -0.011239 | 66.97 | 99.01  | 28.57 | HB   | VAL | 178 |
| C | -0.508979 | 65.19 | 99.28  | 27.54 | CG1  | VAL | 178 |
| H | 0.134470  | 65.59 | 99.89  | 26.86 | 1HG1 | VAL | 178 |
| H | 0.116550  | 65.16 | 98.35  | 27.19 | 2HG1 | VAL | 178 |
| H | 0.114528  | 64.26 | 99.58  | 27.76 | 3HG1 | VAL | 178 |
| C | -0.370974 | 66.13 | 100.74 | 29.34 | CG2  | VAL | 178 |
| H | 0.083657  | 66.51 | 101.33 | 28.63 | 1HG2 | VAL | 178 |
| H | 0.083018  | 65.21 | 101.05 | 29.58 | 2HG2 | VAL | 178 |
| H | 0.082311  | 66.71 | 100.76 | 30.15 | 3HG2 | VAL | 178 |
| C | 0.544012  | 65.29 | 96.97  | 29.31 | C    | VAL | 178 |
| O | -0.648521 | 64.19 | 96.54  | 28.99 | O    | VAL | 178 |
| N | -0.596889 | 66.41 | 96.26  | 29.18 | N    | LYS | 179 |
| H | 0.356899  | 67.28 | 96.67  | 29.46 | H    | LYS | 179 |
| C | 0.383649  | 66.41 | 94.91  | 28.65 | CA   | LYS | 179 |
| H | -0.063321 | 66.04 | 94.99  | 27.73 | HA   | LYS | 179 |
| C | -0.351220 | 67.84 | 94.36  | 28.63 | CB   | LYS | 179 |
| H | 0.028223  | 67.80 | 93.37  | 28.45 | HB1  | LYS | 179 |
| H | 0.141293  | 68.26 | 94.52  | 29.52 | HB2  | LYS | 179 |
| C | 0.311533  | 68.72 | 94.98  | 27.58 | CG   | LYS | 179 |
| H | -0.143657 | 68.78 | 95.97  | 27.75 | HG1  | LYS | 179 |
| H | -0.012615 | 68.32 | 94.83  | 26.68 | HG2  | LYS | 179 |
| C | 0.190307  | 70.10 | 94.38  | 27.63 | CD   | LYS | 179 |
| H | -0.045679 | 70.03 | 93.39  | 27.59 | HD1  | LYS | 179 |
| H | -0.076667 | 70.54 | 94.65  | 28.48 | HD2  | LYS | 179 |
| C | -0.281620 | 70.95 | 94.86  | 26.46 | CE   | LYS | 179 |
| H | 0.066864  | 70.89 | 95.86  | 26.39 | HE1  | LYS | 179 |
| H | 0.075774  | 70.61 | 94.45  | 25.61 | HE2  | LYS | 179 |
| N | 0.353706  | 72.38 | 94.49  | 26.64 | NZ   | LYS | 179 |
| H | -0.168080 | 72.91 | 94.82  | 25.86 | HZ1  | LYS | 179 |
| H | -0.173954 | 72.73 | 94.90  | 27.48 | HZ2  | LYS | 179 |
| H | 0.135247  | 72.45 | 93.49  | 26.70 | HZ3  | LYS | 179 |
| C | 0.585840  | 65.53 | 93.97  | 29.48 | C    | LYS | 179 |



|   |           |       |       |       |      |     |     |
|---|-----------|-------|-------|-------|------|-----|-----|
| O | -0.727141 | 64.85 | 93.11 | 28.93 | O    | LYS | 179 |
| N | -0.495103 | 65.56 | 94.15 | 30.80 | N    | GLU | 180 |
| H | 0.356908  | 66.15 | 94.87 | 31.18 | H    | GLU | 180 |
| C | 0.254842  | 64.77 | 93.33 | 31.71 | CA   | GLU | 180 |
| H | -0.045890 | 65.00 | 92.38 | 31.49 | HA   | GLU | 180 |
| C | -0.013557 | 65.16 | 93.63 | 33.16 | CB   | GLU | 180 |
| H | 0.089070  | 64.78 | 94.53 | 33.41 | HB1  | GLU | 180 |
| H | 0.010655  | 66.15 | 93.67 | 33.23 | HB2  | GLU | 180 |
| C | -0.294072 | 64.65 | 92.60 | 34.17 | CG   | GLU | 180 |
| H | 0.049902  | 65.07 | 91.72 | 33.97 | HG1  | GLU | 180 |
| H | 0.080150  | 63.66 | 92.53 | 34.07 | HG2  | GLU | 180 |
| C | 0.789955  | 64.96 | 92.97 | 35.62 | CD   | GLU | 180 |
| O | -0.668266 | 65.28 | 92.06 | 36.41 | OE1  | GLU | 180 |
| O | -0.552526 | 64.87 | 94.17 | 35.97 | OE2  | GLU | 180 |
| C | 0.511879  | 63.28 | 93.58 | 31.49 | C    | GLU | 180 |
| O | -0.653552 | 62.50 | 92.63 | 31.34 | O    | GLU | 180 |
| N | -0.426188 | 62.88 | 94.85 | 31.48 | N    | ILE | 181 |
| H | 0.327470  | 63.56 | 95.57 | 31.61 | H    | ILE | 181 |
| C | 0.165278  | 61.49 | 95.23 | 31.26 | CA   | ILE | 181 |
| H | -0.022906 | 60.99 | 94.74 | 31.98 | HA   | ILE | 181 |
| C | 0.006957  | 61.29 | 96.78 | 31.38 | CB   | ILE | 181 |
| H | 0.058236  | 62.06 | 97.25 | 30.94 | HB   | ILE | 181 |
| C | -0.340131 | 59.99 | 97.21 | 30.69 | CG2  | ILE | 181 |
| H | 0.107244  | 59.88 | 98.20 | 30.77 | 1HG2 | ILE | 181 |
| H | 0.102274  | 60.03 | 96.96 | 29.72 | 2HG2 | ILE | 181 |
| H | 0.070721  | 59.22 | 96.75 | 31.13 | 3HG2 | ILE | 181 |
| C | 0.319892  | 61.21 | 97.21 | 32.84 | CG1  | ILE | 181 |
| H | -0.089177 | 61.34 | 98.20 | 32.89 | 1HG1 | ILE | 181 |
| H | -0.092201 | 61.94 | 96.76 | 33.35 | 2HG1 | ILE | 181 |
| C | -0.217341 | 59.90 | 96.87 | 33.51 | CD   | ILE | 181 |
| H | 0.028858  | 59.92 | 97.18 | 34.46 | HD1  | ILE | 181 |
| H | 0.051805  | 59.15 | 97.33 | 33.03 | HD2  | ILE | 181 |
| H | 0.034659  | 59.76 | 95.88 | 33.48 | HD3  | ILE | 181 |
| C | 0.559264  | 61.02 | 94.76 | 29.88 | C    | ILE | 181 |
| O | -0.671502 | 59.89 | 94.32 | 29.72 | O    | ILE | 181 |
| N | -0.495826 | 61.88 | 94.88 | 28.87 | N    | LYS | 182 |
| H | 0.362775  | 62.80 | 95.25 | 29.04 | H    | LYS | 182 |
| C | 0.298974  | 61.50 | 94.46 | 27.52 | CA   | LYS | 182 |
| H | -0.013200 | 60.61 | 94.88 | 27.38 | HA   | LYS | 182 |
| C | -0.268023 | 62.50 | 94.99 | 26.50 | CB   | LYS | 182 |
| H | 0.011181  | 62.20 | 94.71 | 25.58 | HB1  | LYS | 182 |
| H | 0.093741  | 63.40 | 94.59 | 26.69 | HB2  | LYS | 182 |
| C | 0.427120  | 62.62 | 96.51 | 26.53 | CG   | LYS | 182 |
| H | -0.055160 | 63.54 | 96.75 | 26.84 | HG1  | LYS | 182 |
| H | -0.112023 | 61.95 | 96.87 | 27.18 | HG2  | LYS | 182 |
| C | -0.146929 | 62.39 | 97.15 | 25.17 | CD   | LYS | 182 |

|   |           |       |       |       |      |     |     |
|---|-----------|-------|-------|-------|------|-----|-----|
| H | -0.008401 | 62.47 | 98.15 | 25.27 | HD1  | LYS | 182 |
| H | 0.056691  | 61.47 | 96.92 | 24.85 | HD2  | LYS | 182 |
| C | -0.131082 | 63.39 | 96.68 | 24.16 | CE   | LYS | 182 |
| H | 0.053824  | 63.22 | 95.72 | 23.95 | HE1  | LYS | 182 |
| H | 0.087937  | 64.31 | 96.78 | 24.54 | HE2  | LYS | 182 |
| N | 0.728890  | 63.35 | 97.45 | 22.89 | NZ   | LYS | 182 |
| H | -0.609136 | 64.03 | 97.10 | 22.25 | HZ1  | LYS | 182 |
| H | -0.057862 | 62.44 | 97.36 | 22.48 | HZ2  | LYS | 182 |
| H | -0.110015 | 63.53 | 98.42 | 23.07 | HZ3  | LYS | 182 |
| C | 0.513547  | 61.35 | 92.93 | 27.40 | C    | LYS | 182 |
| O | -0.660911 | 60.36 | 92.45 | 26.86 | O    | LYS | 182 |
| N | -0.417957 | 62.33 | 92.18 | 27.90 | N    | ASN | 183 |
| H | 0.340083  | 63.13 | 92.61 | 28.30 | H    | ASN | 183 |
| C | 0.184710  | 62.23 | 90.72 | 27.87 | CA   | ASN | 183 |
| H | 0.011531  | 62.14 | 90.45 | 26.92 | HA   | ASN | 183 |
| C | -0.385653 | 63.50 | 90.09 | 28.47 | CB   | ASN | 183 |
| H | 0.086726  | 63.25 | 89.21 | 28.88 | HB1  | ASN | 183 |
| H | 0.194626  | 63.86 | 90.70 | 29.17 | HB2  | ASN | 183 |
| C | 0.884617  | 64.58 | 89.84 | 27.43 | CG   | ASN | 183 |
| O | -0.763932 | 64.58 | 88.82 | 26.74 | OD1  | ASN | 183 |
| N | -1.042328 | 65.50 | 90.79 | 27.31 | ND2  | ASN | 183 |
| H | 0.493481  | 65.46 | 91.61 | 27.89 | 1HD2 | ASN | 183 |
| H | 0.455903  | 66.24 | 90.69 | 26.64 | 2HD2 | ASN | 183 |
| C | 0.469565  | 61.02 | 90.32 | 28.72 | C    | ASN | 183 |
| O | -0.678372 | 60.28 | 89.39 | 28.37 | O    | ASN | 183 |
| N | -0.281801 | 60.82 | 91.03 | 29.83 | N    | GLY | 184 |
| H | 0.333653  | 61.45 | 91.78 | 30.05 | H    | GLY | 184 |
| C | -0.102459 | 59.71 | 90.75 | 30.72 | CA   | GLY | 184 |
| H | 0.121499  | 59.82 | 91.34 | 31.52 | HA1  | GLY | 184 |
| H | 0.038983  | 59.80 | 89.79 | 31.01 | HA2  | GLY | 184 |
| C | 0.594412  | 58.35 | 90.97 | 30.10 | C    | GLY | 184 |
| O | -0.727371 | 57.45 | 90.14 | 30.23 | O    | GLY | 184 |
| N | -0.577492 | 58.19 | 92.11 | 29.43 | N    | ARG | 185 |
| H | 0.414541  | 58.96 | 92.75 | 29.37 | H    | ARG | 185 |
| C | 0.271073  | 56.93 | 92.44 | 28.77 | CA   | ARG | 185 |
| H | -0.042078 | 56.23 | 92.38 | 29.48 | HA   | ARG | 185 |
| C | -0.147593 | 56.99 | 93.86 | 28.19 | CB   | ARG | 185 |
| H | -0.017903 | 56.24 | 93.98 | 27.54 | HB1  | ARG | 185 |
| H | 0.066143  | 57.87 | 93.98 | 27.72 | HB2  | ARG | 185 |
| C | 0.289511  | 56.88 | 94.94 | 29.26 | CG   | ARG | 185 |
| H | -0.047189 | 57.51 | 94.72 | 30.00 | HG1  | ARG | 185 |
| H | -0.046016 | 55.94 | 94.94 | 29.62 | HG2  | ARG | 185 |
| C | 0.031036  | 57.19 | 96.33 | 28.74 | CD   | ARG | 185 |
| H | 0.046483  | 56.59 | 96.55 | 27.97 | HD1  | ARG | 185 |
| H | 0.019347  | 58.15 | 96.38 | 28.44 | HD2  | ARG | 185 |
| N | -0.710747 | 56.99 | 97.33 | 29.78 | NE   | ARG | 185 |

|   |           |       |        |       |      |     |     |
|---|-----------|-------|--------|-------|------|-----|-----|
| H | 0.358719  | 56.62 | 97.01  | 30.66 | HE   | ARG | 185 |
| C | 0.817452  | 57.25 | 98.63  | 29.66 | CZ   | ARG | 185 |
| N | -1.120453 | 57.74 | 99.10  | 28.52 | NH1  | ARG | 185 |
| H | 0.405256  | 57.91 | 98.48  | 27.75 | 1HH1 | ARG | 185 |
| H | 0.442530  | 57.94 | 100.08 | 28.43 | 2HH1 | ARG | 185 |
| N | -1.249112 | 57.02 | 99.45  | 30.67 | NH2  | ARG | 185 |
| H | 0.486053  | 56.65 | 99.10  | 31.53 | 1HH2 | ARG | 185 |
| H | 0.451069  | 57.22 | 100.43 | 30.58 | 2HH2 | ARG | 185 |
| C | 0.554450  | 56.62 | 91.42  | 27.67 | C    | ARG | 185 |
| O | -0.680931 | 55.46 | 91.04  | 27.49 | O    | ARG | 185 |
| N | -0.453281 | 57.65 | 90.99  | 26.94 | N    | LEU | 186 |
| H | 0.350607  | 58.57 | 91.34  | 27.12 | H    | LEU | 186 |
| C | 0.126632  | 57.46 | 89.99  | 25.89 | CA   | LEU | 186 |
| H | 0.019968  | 56.79 | 90.38  | 25.26 | HA   | LEU | 186 |
| C | -0.203970 | 58.77 | 89.74  | 25.15 | CB   | LEU | 186 |
| H | 0.131384  | 59.46 | 89.49  | 25.83 | HB1  | LEU | 186 |
| H | 0.051652  | 59.04 | 90.59  | 24.70 | HB2  | LEU | 186 |
| C | 0.287820  | 58.75 | 88.64  | 24.07 | CG   | LEU | 186 |
| H | -0.033382 | 58.52 | 87.76  | 24.49 | HG   | LEU | 186 |
| C | -0.290882 | 57.69 | 88.93  | 23.01 | CD1  | LEU | 186 |
| H | 0.042761  | 57.70 | 88.20  | 22.32 | 1HD1 | LEU | 186 |
| H | 0.051975  | 56.79 | 88.98  | 23.43 | 2HD1 | LEU | 186 |
| H | 0.079731  | 57.90 | 89.80  | 22.56 | 3HD1 | LEU | 186 |
| C | -0.320330 | 60.12 | 88.53  | 23.45 | CD2  | LEU | 186 |
| H | 0.082934  | 60.12 | 87.82  | 22.75 | 1HD2 | LEU | 186 |
| H | 0.052613  | 60.37 | 89.41  | 23.03 | 2HD2 | LEU | 186 |
| H | 0.065183  | 60.79 | 88.30  | 24.16 | 3HD2 | LEU | 186 |
| C | 0.575580  | 56.95 | 88.69  | 26.52 | C    | LEU | 186 |
| O | -0.668123 | 56.05 | 88.04  | 25.98 | O    | LEU | 186 |
| N | -0.526689 | 57.53 | 88.32  | 27.66 | N    | ALA | 187 |
| H | 0.375211  | 58.26 | 88.89  | 28.04 | H    | ALA | 187 |
| C | 0.371567  | 57.13 | 87.11  | 28.38 | CA   | ALA | 187 |
| H | -0.046058 | 57.23 | 86.38  | 27.71 | HA   | ALA | 187 |
| C | -0.298453 | 58.06 | 86.87  | 29.58 | CB   | ALA | 187 |
| H | 0.040537  | 57.77 | 86.04  | 30.06 | HB1  | ALA | 187 |
| H | 0.077915  | 59.00 | 86.77  | 29.26 | HB2  | ALA | 187 |
| H | 0.137010  | 58.00 | 87.65  | 30.20 | HB3  | ALA | 187 |
| C | 0.668444  | 55.68 | 87.17  | 28.85 | C    | ALA | 187 |
| O | -0.704338 | 54.96 | 86.19  | 28.73 | O    | ALA | 187 |
| N | -0.585529 | 55.26 | 88.32  | 29.39 | N    | MET | 188 |
| H | 0.430672  | 55.90 | 89.08  | 29.48 | H    | MET | 188 |
| C | -0.022161 | 53.88 | 88.47  | 29.86 | CA   | MET | 188 |
| H | 0.029982  | 53.74 | 87.73  | 30.53 | HA   | MET | 188 |
| C | 0.274926  | 53.66 | 89.83  | 30.53 | CB   | MET | 188 |
| H | -0.075668 | 52.68 | 89.93  | 30.71 | HB1  | MET | 188 |
| H | 0.034153  | 53.96 | 90.54  | 29.89 | HB2  | MET | 188 |

|   |           |       |       |       |     |     |     |
|---|-----------|-------|-------|-------|-----|-----|-----|
| C | 0.026345  | 54.41 | 90.02 | 31.84 | CG  | MET | 188 |
| H | 0.063572  | 55.37 | 89.98 | 31.58 | HG1 | MET | 188 |
| H | 0.037473  | 54.17 | 89.22 | 32.38 | HG2 | MET | 188 |
| S | -0.436084 | 53.99 | 91.58 | 32.69 | SD  | MET | 188 |
| C | -0.196430 | 54.99 | 92.78 | 31.77 | CE  | MET | 188 |
| H | 0.146507  | 54.85 | 93.69 | 32.14 | HE1 | MET | 188 |
| H | 0.157363  | 55.96 | 92.53 | 31.84 | HE2 | MET | 188 |
| H | 0.095292  | 54.72 | 92.77 | 30.80 | HE3 | MET | 188 |
| C | 0.512095  | 52.92 | 88.33 | 28.67 | C   | MET | 188 |
| O | -0.637967 | 51.94 | 87.58 | 28.72 | O   | MET | 188 |
| N | -0.430064 | 53.23 | 89.06 | 27.61 | N   | PHE | 189 |
| H | 0.333633  | 54.04 | 89.65 | 27.65 | H   | PHE | 189 |
| C | 0.128050  | 52.44 | 89.06 | 26.39 | CA  | PHE | 189 |
| H | 0.044459  | 51.55 | 89.46 | 26.58 | HA  | PHE | 189 |
| C | -0.096838 | 53.19 | 89.89 | 25.34 | CB  | PHE | 189 |
| H | 0.111861  | 54.03 | 89.41 | 25.09 | HB1 | PHE | 189 |
| H | 0.078235  | 53.41 | 90.78 | 25.73 | HB2 | PHE | 189 |
| C | 0.003951  | 52.42 | 90.12 | 24.08 | CG  | PHE | 189 |
| C | -0.113734 | 51.63 | 91.25 | 23.93 | CD1 | PHE | 189 |
| H | 0.127041  | 51.55 | 91.90 | 24.69 | HD1 | PHE | 189 |
| C | -0.169937 | 50.95 | 91.50 | 22.73 | CE1 | PHE | 189 |
| H | 0.117415  | 50.39 | 92.32 | 22.64 | HE1 | PHE | 189 |
| C | -0.094393 | 51.05 | 90.61 | 21.68 | CZ  | PHE | 189 |
| H | 0.101597  | 50.56 | 90.78 | 20.83 | HZ  | PHE | 189 |
| C | -0.141352 | 51.83 | 89.47 | 21.82 | CE2 | PHE | 189 |
| H | 0.128373  | 51.91 | 88.82 | 21.07 | HE2 | PHE | 189 |
| C | -0.191759 | 52.51 | 89.24 | 23.02 | CD2 | PHE | 189 |
| H | 0.149734  | 53.07 | 88.41 | 23.11 | HD2 | PHE | 189 |
| C | 0.524227  | 52.30 | 87.61 | 25.92 | C   | PHE | 189 |
| O | -0.610443 | 51.20 | 87.14 | 25.59 | O   | PHE | 189 |
| N | -0.430119 | 53.42 | 86.90 | 25.89 | N   | SER | 190 |
| H | 0.357394  | 54.28 | 87.34 | 26.17 | H   | SER | 190 |
| C | 0.076431  | 53.45 | 85.51 | 25.46 | CA  | SER | 190 |
| H | 0.073851  | 52.93 | 85.51 | 24.60 | HA  | SER | 190 |
| C | 0.303116  | 54.90 | 85.08 | 25.23 | CB  | SER | 190 |
| H | -0.102332 | 54.94 | 84.14 | 24.91 | HB1 | SER | 190 |
| H | 0.010584  | 55.43 | 85.17 | 26.08 | HB2 | SER | 190 |
| O | -0.559685 | 55.51 | 85.90 | 24.25 | OG  | SER | 190 |
| H | 0.311780  | 56.45 | 85.61 | 24.11 | HG  | SER | 190 |
| C | 0.492629  | 52.76 | 84.57 | 26.44 | C   | SER | 190 |
| O | -0.636769 | 52.19 | 83.55 | 26.03 | O   | SER | 190 |
| N | -0.424385 | 52.80 | 84.88 | 27.73 | N   | MET | 191 |
| H | 0.355419  | 53.29 | 85.70 | 28.03 | H   | MET | 191 |
| C | 0.176067  | 52.14 | 84.03 | 28.70 | CA  | MET | 191 |
| H | -0.009598 | 52.44 | 83.10 | 28.52 | HA  | MET | 191 |
| C | 0.093696  | 52.54 | 84.41 | 30.12 | CB  | MET | 191 |

|   |           |       |       |       |     |     |     |
|---|-----------|-------|-------|-------|-----|-----|-----|
| H | -0.028471 | 51.80 | 84.17 | 30.74 | HB1 | MET | 191 |
| H | 0.040727  | 52.69 | 85.40 | 30.16 | HB2 | MET | 191 |
| C | 0.037140  | 53.82 | 83.71 | 30.60 | CG  | MET | 191 |
| H | 0.010444  | 53.95 | 84.06 | 31.53 | HG1 | MET | 191 |
| H | 0.097990  | 54.53 | 84.07 | 30.01 | HG2 | MET | 191 |
| S | -0.302396 | 53.73 | 81.88 | 30.56 | SD  | MET | 191 |
| C | -0.237596 | 52.27 | 81.55 | 31.59 | CE  | MET | 191 |
| H | 0.162589  | 52.11 | 80.57 | 31.64 | HE1 | MET | 191 |
| H | -0.001288 | 52.42 | 81.92 | 32.50 | HE2 | MET | 191 |
| H | 0.146871  | 51.47 | 81.99 | 31.17 | HE3 | MET | 191 |
| C | 0.468501  | 50.62 | 84.17 | 28.52 | C   | MET | 191 |
| O | -0.653445 | 49.89 | 83.19 | 28.68 | O   | MET | 191 |
| N | -0.277828 | 50.17 | 85.37 | 28.18 | N   | PHE | 192 |
| H | 0.303032  | 50.82 | 86.13 | 28.09 | H   | PHE | 192 |
| C | -0.031472 | 48.75 | 85.62 | 27.93 | CA  | PHE | 192 |
| H | 0.035823  | 48.23 | 85.41 | 28.76 | HA  | PHE | 192 |
| C | -0.121279 | 48.53 | 87.08 | 27.55 | CB  | PHE | 192 |
| H | 0.104111  | 48.93 | 87.24 | 26.65 | HB1 | PHE | 192 |
| H | 0.170833  | 48.98 | 87.66 | 28.23 | HB2 | PHE | 192 |
| C | 0.102236  | 47.08 | 87.48 | 27.50 | CG  | PHE | 192 |
| C | -0.141484 | 46.34 | 87.65 | 28.66 | CD1 | PHE | 192 |
| H | 0.155716  | 46.78 | 87.48 | 29.54 | HD1 | PHE | 192 |
| C | -0.161820 | 45.01 | 88.06 | 28.61 | CE1 | PHE | 192 |
| H | 0.097529  | 44.49 | 88.18 | 29.46 | HE1 | PHE | 192 |
| C | -0.113590 | 44.40 | 88.30 | 27.39 | CZ  | PHE | 192 |
| H | 0.092241  | 43.44 | 88.59 | 27.35 | HZ  | PHE | 192 |
| C | -0.153074 | 45.12 | 88.13 | 26.22 | CE2 | PHE | 192 |
| H | 0.114249  | 44.68 | 88.30 | 25.34 | HE2 | PHE | 192 |
| C | -0.196353 | 46.46 | 87.72 | 26.28 | CD2 | PHE | 192 |
| H | 0.134873  | 46.97 | 87.60 | 25.43 | HD2 | PHE | 192 |
| C | 0.494192  | 48.40 | 84.72 | 26.75 | C   | PHE | 192 |
| O | -0.631563 | 47.33 | 84.13 | 26.69 | O   | PHE | 192 |
| N | -0.322455 | 49.34 | 84.63 | 25.80 | N   | GLY | 193 |
| H | 0.321213  | 50.19 | 85.15 | 25.90 | H   | GLY | 193 |
| C | -0.177401 | 49.14 | 83.79 | 24.63 | CA  | GLY | 193 |
| H | 0.120183  | 49.93 | 83.92 | 24.02 | HA1 | GLY | 193 |
| H | 0.111549  | 48.31 | 84.08 | 24.17 | HA2 | GLY | 193 |
| C | 0.496171  | 49.03 | 82.33 | 25.03 | C   | GLY | 193 |
| O | -0.604678 | 48.16 | 81.60 | 24.54 | O   | GLY | 193 |
| N | -0.347886 | 49.91 | 81.88 | 25.92 | N   | PHE | 194 |
| H | 0.294530  | 50.62 | 82.50 | 26.27 | H   | PHE | 194 |
| C | 0.011224  | 49.86 | 80.50 | 26.40 | CA  | PHE | 194 |
| H | 0.037816  | 50.01 | 79.93 | 25.59 | HA  | PHE | 194 |
| C | -0.117136 | 50.95 | 80.25 | 27.45 | CB  | PHE | 194 |
| H | 0.033874  | 50.72 | 79.42 | 27.96 | HB1 | PHE | 194 |
| H | 0.122021  | 50.98 | 81.02 | 28.08 | HB2 | PHE | 194 |

|   |           |       |       |       |      |     |     |
|---|-----------|-------|-------|-------|------|-----|-----|
| C | 0.228957  | 52.34 | 80.06 | 26.88 | CG   | PHE | 194 |
| C | -0.232947 | 53.41 | 79.75 | 27.72 | CD1  | PHE | 194 |
| H | 0.128186  | 53.25 | 79.65 | 28.70 | HD1  | PHE | 194 |
| C | -0.089871 | 54.70 | 79.56 | 27.21 | CE1  | PHE | 194 |
| H | 0.131612  | 55.45 | 79.33 | 27.82 | HE1  | PHE | 194 |
| C | -0.260250 | 54.92 | 79.70 | 25.84 | CZ   | PHE | 194 |
| H | 0.143162  | 55.84 | 79.57 | 25.47 | HZ   | PHE | 194 |
| C | -0.055742 | 53.87 | 80.01 | 24.99 | CE2  | PHE | 194 |
| H | 0.050306  | 54.03 | 80.11 | 24.01 | HE2  | PHE | 194 |
| C | -0.212530 | 52.58 | 80.19 | 25.51 | CD2  | PHE | 194 |
| H | 0.099044  | 51.83 | 80.42 | 24.89 | HD2  | PHE | 194 |
| C | 0.555537  | 48.48 | 80.24 | 27.03 | C    | PHE | 194 |
| O | -0.633309 | 47.85 | 79.21 | 26.75 | O    | PHE | 194 |
| N | -0.589352 | 48.01 | 81.16 | 27.87 | N    | PHE | 195 |
| H | 0.406731  | 48.56 | 81.98 | 28.05 | H    | PHE | 195 |
| C | 0.553841  | 46.71 | 81.01 | 28.52 | CA   | PHE | 195 |
| H | -0.151982 | 46.82 | 80.14 | 29.01 | HA   | PHE | 195 |
| C | -0.581789 | 46.45 | 82.18 | 29.48 | CB   | PHE | 195 |
| H | 0.094973  | 45.52 | 82.09 | 29.84 | HB1  | PHE | 195 |
| H | 0.223016  | 46.54 | 83.04 | 28.98 | HB2  | PHE | 195 |
| C | 0.451082  | 47.39 | 82.23 | 30.65 | CG   | PHE | 195 |
| C | -0.456845 | 48.03 | 81.08 | 31.11 | CD1  | PHE | 195 |
| H | 0.267808  | 47.88 | 80.21 | 30.64 | HD1  | PHE | 195 |
| C | -0.047740 | 48.88 | 81.13 | 32.22 | CE1  | PHE | 195 |
| H | 0.112329  | 49.34 | 80.29 | 32.53 | HE1  | PHE | 195 |
| C | -0.210801 | 49.10 | 82.32 | 32.88 | CZ   | PHE | 195 |
| H | 0.086182  | 49.71 | 82.35 | 33.67 | HZ   | PHE | 195 |
| C | -0.098121 | 48.47 | 83.48 | 32.44 | CE2  | PHE | 195 |
| H | 0.099362  | 48.63 | 84.34 | 32.91 | HE2  | PHE | 195 |
| C | -0.262572 | 47.62 | 83.43 | 31.32 | CD2  | PHE | 195 |
| H | 0.140486  | 47.17 | 84.27 | 31.01 | HD2  | PHE | 195 |
| C | 0.515044  | 45.54 | 80.90 | 27.56 | C    | PHE | 195 |
| O | -0.640877 | 44.70 | 79.99 | 27.69 | O    | PHE | 195 |
| N | -0.422642 | 45.47 | 81.80 | 26.58 | N    | VAL | 196 |
| H | 0.370686  | 46.17 | 82.51 | 26.51 | H    | VAL | 196 |
| C | -0.067489 | 44.37 | 81.77 | 25.62 | CA   | VAL | 196 |
| H | 0.049344  | 43.57 | 81.63 | 26.21 | HA   | VAL | 196 |
| C | 0.369574  | 44.27 | 83.11 | 24.84 | CB   | VAL | 196 |
| H | 0.008883  | 45.16 | 83.33 | 24.43 | HB   | VAL | 196 |
| C | -0.459981 | 43.23 | 83.01 | 23.74 | CG1  | VAL | 196 |
| H | 0.093134  | 43.18 | 83.88 | 23.25 | 1HG1 | VAL | 196 |
| H | 0.078483  | 43.49 | 82.28 | 23.10 | 2HG1 | VAL | 196 |
| H | 0.095131  | 42.34 | 82.81 | 24.14 | 3HG1 | VAL | 196 |
| C | -0.237632 | 43.88 | 84.23 | 25.79 | CG2  | VAL | 196 |
| H | 0.037203  | 43.82 | 85.09 | 25.28 | 1HG2 | VAL | 196 |
| H | 0.034727  | 42.99 | 84.02 | 26.20 | 2HG2 | VAL | 196 |

|   |           |       |       |       |      |     |     |
|---|-----------|-------|-------|-------|------|-----|-----|
| H | 0.066407  | 44.56 | 84.32 | 26.51 | 3HG2 | VAL | 196 |
| C | 0.478337  | 44.45 | 80.60 | 24.65 | C    | VAL | 196 |
| O | -0.623011 | 43.43 | 79.98 | 24.34 | O    | VAL | 196 |
| N | -0.508640 | 45.65 | 80.28 | 24.17 | N    | GLN | 197 |
| H | 0.402232  | 46.45 | 80.81 | 24.45 | H    | GLN | 197 |
| C | 0.199682  | 45.84 | 79.16 | 23.23 | CA   | GLN | 197 |
| H | -0.017508 | 45.20 | 79.34 | 22.48 | HA   | GLN | 197 |
| C | 0.163342  | 47.28 | 79.11 | 22.71 | CB   | GLN | 197 |
| H | -0.057566 | 47.37 | 78.33 | 22.09 | HB1  | GLN | 197 |
| H | 0.001630  | 47.90 | 78.99 | 23.49 | HB2  | GLN | 197 |
| C | -0.256846 | 47.68 | 80.37 | 21.97 | CG   | GLN | 197 |
| H | 0.077813  | 47.64 | 81.14 | 22.61 | HG1  | GLN | 197 |
| H | 0.032608  | 47.02 | 80.52 | 21.23 | HG2  | GLN | 197 |
| C | 0.908888  | 49.07 | 80.32 | 21.37 | CD   | GLN | 197 |
| O | -0.791571 | 49.66 | 81.36 | 21.05 | OE1  | GLN | 197 |
| N | -1.059868 | 49.60 | 79.11 | 21.21 | NE2  | GLN | 197 |
| H | 0.479399  | 49.08 | 78.29 | 21.47 | 1HE2 | GLN | 197 |
| H | 0.532745  | 50.51 | 79.01 | 20.82 | 2HE2 | GLN | 197 |
| C | 0.493740  | 45.49 | 77.83 | 23.89 | C    | GLN | 197 |
| O | -0.586924 | 44.93 | 76.94 | 23.25 | O    | GLN | 197 |
| N | -0.503925 | 45.82 | 77.70 | 25.17 | N    | ALA | 198 |
| H | 0.354776  | 46.30 | 78.44 | 25.64 | H    | ALA | 198 |
| C | 0.260278  | 45.50 | 76.47 | 25.89 | CA   | ALA | 198 |
| H | 0.043496  | 45.97 | 75.72 | 25.44 | HA   | ALA | 198 |
| C | -0.311177 | 45.98 | 76.56 | 27.34 | CB   | ALA | 198 |
| H | 0.071054  | 45.76 | 75.71 | 27.82 | HB1  | ALA | 198 |
| H | 0.089331  | 46.97 | 76.70 | 27.35 | HB2  | ALA | 198 |
| H | 0.109363  | 45.54 | 77.33 | 27.79 | HB3  | ALA | 198 |
| C | 0.579240  | 43.98 | 76.29 | 25.85 | C    | ALA | 198 |
| O | -0.588721 | 43.48 | 75.26 | 25.41 | O    | ALA | 198 |
| N | -0.545855 | 43.27 | 77.32 | 26.31 | N    | ILE | 199 |
| H | 0.350706  | 43.74 | 78.13 | 26.64 | H    | ILE | 199 |
| C | 0.003484  | 41.82 | 77.28 | 26.33 | CA   | ILE | 199 |
| H | 0.046958  | 41.64 | 76.47 | 26.90 | HA   | ILE | 199 |
| C | 0.236957  | 41.25 | 78.58 | 26.95 | CB   | ILE | 199 |
| H | -0.002361 | 41.66 | 79.37 | 26.49 | HB   | ILE | 199 |
| C | -0.441600 | 39.75 | 78.66 | 26.75 | CG2  | ILE | 199 |
| H | 0.108792  | 39.41 | 79.51 | 27.15 | 1HG2 | ILE | 199 |
| H | 0.074072  | 39.54 | 78.64 | 25.77 | 2HG2 | ILE | 199 |
| H | 0.094227  | 39.32 | 77.88 | 27.20 | 3HG2 | ILE | 199 |
| C | 0.241936  | 41.59 | 78.64 | 28.44 | CG1  | ILE | 199 |
| H | -0.061984 | 42.57 | 78.49 | 28.55 | 1HG1 | ILE | 199 |
| H | -0.067026 | 41.09 | 77.91 | 28.90 | 2HG1 | ILE | 199 |
| C | -0.178241 | 41.23 | 79.96 | 29.09 | CD   | ILE | 199 |
| H | 0.039610  | 41.48 | 79.93 | 30.06 | HD1  | ILE | 199 |
| H | 0.033490  | 41.73 | 80.70 | 28.64 | HD2  | ILE | 199 |

|   |           |       |       |       |      |     |     |
|---|-----------|-------|-------|-------|------|-----|-----|
| H | 0.008962  | 40.25 | 80.12 | 29.00 | HD3  | ILE | 199 |
| C | 0.453300  | 41.18 | 77.07 | 24.96 | C    | ILE | 199 |
| O | -0.522068 | 40.21 | 76.34 | 24.83 | O    | ILE | 199 |
| N | -0.481024 | 41.73 | 77.70 | 23.92 | N    | VAL | 200 |
| H | 0.342775  | 42.55 | 78.26 | 24.06 | H    | VAL | 200 |
| C | 0.014852  | 41.15 | 77.58 | 22.60 | CA   | VAL | 200 |
| H | 0.085078  | 40.19 | 77.47 | 22.85 | HA   | VAL | 200 |
| C | 0.260094  | 41.46 | 78.86 | 21.76 | CB   | VAL | 200 |
| H | 0.006492  | 42.45 | 79.00 | 21.71 | HB   | VAL | 200 |
| C | -0.416863 | 40.94 | 78.70 | 20.33 | CG1  | VAL | 200 |
| H | 0.112620  | 41.15 | 79.53 | 19.81 | 1HG1 | VAL | 200 |
| H | 0.085198  | 41.38 | 77.91 | 19.90 | 2HG1 | VAL | 200 |
| H | 0.095839  | 39.95 | 78.56 | 20.34 | 3HG1 | VAL | 200 |
| C | -0.240113 | 40.81 | 80.07 | 22.42 | CG2  | VAL | 200 |
| H | 0.061886  | 41.01 | 80.89 | 21.88 | 1HG2 | VAL | 200 |
| H | 0.057346  | 39.82 | 79.93 | 22.46 | 2HG2 | VAL | 200 |
| H | 0.048498  | 41.17 | 80.18 | 23.34 | 3HG2 | VAL | 200 |
| C | 0.403274  | 41.51 | 76.34 | 21.77 | C    | VAL | 200 |
| O | -0.528497 | 40.65 | 75.80 | 21.08 | O    | VAL | 200 |
| N | -0.401557 | 42.76 | 75.90 | 21.83 | N    | THR | 201 |
| H | 0.365027  | 43.41 | 76.36 | 22.43 | H    | THR | 201 |
| C | 0.331446  | 43.21 | 74.75 | 21.04 | CA   | THR | 201 |
| H | -0.020016 | 42.51 | 74.75 | 20.33 | HA   | THR | 201 |
| C | 0.096580  | 44.65 | 74.93 | 20.51 | CB   | THR | 201 |
| H | -0.021314 | 44.92 | 74.16 | 19.92 | HB   | THR | 201 |
| C | -0.071834 | 44.79 | 76.24 | 19.74 | CG2  | THR | 201 |
| H | 0.054873  | 45.73 | 76.34 | 19.41 | 1HG2 | THR | 201 |
| H | 0.022882  | 44.17 | 76.24 | 18.96 | 2HG2 | THR | 201 |
| H | 0.007463  | 44.58 | 77.01 | 20.35 | 3HG2 | THR | 201 |
| O | -0.618021 | 45.58 | 74.90 | 21.61 | OG1  | THR | 201 |
| H | 0.383201  | 46.51 | 75.01 | 21.27 | HG1  | THR | 201 |
| C | 0.411915  | 43.18 | 73.41 | 21.78 | C    | THR | 201 |
| O | -0.537201 | 43.05 | 72.36 | 21.15 | O    | THR | 201 |
| N | -0.303929 | 43.34 | 73.46 | 23.10 | N    | GLY | 202 |
| H | 0.306237  | 43.46 | 74.35 | 23.55 | H    | GLY | 202 |
| C | -0.233257 | 43.34 | 72.25 | 23.90 | CA   | GLY | 202 |
| H | 0.157033  | 42.61 | 71.66 | 23.56 | HA1  | GLY | 202 |
| H | 0.138603  | 43.15 | 72.51 | 24.85 | HA2  | GLY | 202 |
| C | 0.392432  | 44.66 | 71.51 | 23.84 | C    | GLY | 202 |
| O | -0.531359 | 44.80 | 70.44 | 24.41 | O    | GLY | 202 |
| N | -0.522669 | 45.64 | 72.08 | 23.14 | N    | LYS | 203 |
| H | 0.362861  | 45.48 | 72.96 | 22.69 | H    | LYS | 203 |
| C | 0.238676  | 46.94 | 71.44 | 23.01 | CA   | LYS | 203 |
| H | 0.029047  | 46.86 | 70.58 | 23.52 | HA   | LYS | 203 |
| C | -0.189090 | 47.24 | 71.18 | 21.54 | CB   | LYS | 203 |
| H | 0.011396  | 48.10 | 70.68 | 21.48 | HB1  | LYS | 203 |



|   |           |       |       |       |     |     |     |
|---|-----------|-------|-------|-------|-----|-----|-----|
| H | 0.017833  | 47.33 | 72.07 | 21.08 | HB2 | LYS | 203 |
| C | 0.259070  | 46.17 | 70.39 | 20.83 | CG  | LYS | 203 |
| H | 0.022488  | 45.28 | 70.84 | 20.95 | HG1 | LYS | 203 |
| H | -0.031010 | 46.13 | 69.47 | 21.22 | HG2 | LYS | 203 |
| C | 0.062913  | 46.50 | 70.31 | 19.36 | CD  | LYS | 203 |
| H | -0.057173 | 47.45 | 70.02 | 19.26 | HD1 | LYS | 203 |
| H | -0.020397 | 46.38 | 71.21 | 18.95 | HD2 | LYS | 203 |
| C | -0.271669 | 45.61 | 69.32 | 18.63 | CE  | LYS | 203 |
| H | 0.083346  | 44.65 | 69.62 | 18.69 | HE1 | LYS | 203 |
| H | 0.092453  | 45.70 | 68.41 | 19.05 | HE2 | LYS | 203 |
| N | 0.577547  | 46.00 | 69.23 | 17.19 | NZ  | LYS | 203 |
| H | -0.138033 | 45.41 | 68.58 | 16.72 | HZ1 | LYS | 203 |
| H | -0.134485 | 45.91 | 70.13 | 16.76 | HZ2 | LYS | 203 |
| H | -0.317583 | 46.95 | 68.93 | 17.12 | HZ3 | LYS | 203 |
| C | 0.386088  | 48.05 | 72.28 | 23.62 | C   | LYS | 203 |
| O | -0.457820 | 47.82 | 73.39 | 24.10 | O   | LYS | 203 |
| N | -0.359318 | 49.27 | 71.74 | 23.59 | N   | GLY | 204 |
| H | 0.270236  | 49.40 | 70.84 | 23.18 | H   | GLY | 204 |
| C | -0.138192 | 50.40 | 72.46 | 24.13 | CA  | GLY | 204 |
| H | 0.071914  | 51.12 | 71.79 | 24.31 | HA1 | GLY | 204 |
| H | 0.105544  | 50.11 | 72.88 | 24.99 | HA2 | GLY | 204 |
| C | 0.438818  | 50.93 | 73.54 | 23.20 | C   | GLY | 204 |
| O | -0.614527 | 50.77 | 73.44 | 21.98 | O   | GLY | 204 |
| N | -0.163639 | 51.57 | 74.58 | 23.75 | N   | PRO | 205 |
| C | -0.173304 | 51.94 | 74.69 | 25.17 | CD  | PRO | 205 |
| H | 0.066072  | 52.74 | 74.12 | 25.38 | HD1 | PRO | 205 |
| H | 0.077484  | 51.18 | 74.42 | 25.76 | HD2 | PRO | 205 |
| C | 0.128669  | 52.26 | 76.14 | 25.30 | CG  | PRO | 205 |
| H | -0.038428 | 52.86 | 76.31 | 26.09 | HG1 | PRO | 205 |
| H | -0.015059 | 51.42 | 76.68 | 25.40 | HG2 | PRO | 205 |
| C | 0.027710  | 52.94 | 76.47 | 24.04 | CB  | PRO | 205 |
| H | 0.034812  | 53.89 | 76.16 | 24.07 | HB1 | PRO | 205 |
| H | -0.001749 | 52.91 | 77.45 | 23.88 | HB2 | PRO | 205 |
| C | 0.062282  | 52.13 | 75.70 | 22.99 | CA  | PRO | 205 |
| H | 0.101720  | 51.40 | 76.24 | 22.56 | HA  | PRO | 205 |
| C | 0.515437  | 53.02 | 75.23 | 21.82 | C   | PRO | 205 |
| O | -0.470991 | 52.91 | 75.72 | 20.70 | O   | PRO | 205 |
| N | -0.585861 | 53.92 | 74.28 | 22.10 | N   | LEU | 206 |
| H | 0.294553  | 53.98 | 73.90 | 23.02 | H   | LEU | 206 |
| C | 0.189923  | 54.80 | 73.78 | 21.05 | CA  | LEU | 206 |
| H | 0.038287  | 55.13 | 74.62 | 20.62 | HA  | LEU | 206 |
| C | -0.188114 | 55.95 | 72.98 | 21.64 | CB  | LEU | 206 |
| H | 0.052768  | 56.51 | 72.63 | 20.89 | HB1 | LEU | 206 |
| H | 0.007424  | 55.57 | 72.21 | 22.16 | HB2 | LEU | 206 |
| C | 0.466516  | 56.87 | 73.77 | 22.59 | CG  | LEU | 206 |
| H | -0.069626 | 56.37 | 74.02 | 23.42 | HG  | LEU | 206 |

|   |           |       |       |       |      |     |     |
|---|-----------|-------|-------|-------|------|-----|-----|
| C | -0.389804 | 58.05 | 72.89 | 22.98 | CD1  | LEU | 206 |
| H | 0.105967  | 58.65 | 73.40 | 23.60 | 1HD1 | LEU | 206 |
| H | 0.045883  | 57.71 | 72.07 | 23.44 | 2HD1 | LEU | 206 |
| H | 0.100260  | 58.55 | 72.63 | 22.16 | 3HD1 | LEU | 206 |
| C | -0.657539 | 57.36 | 75.05 | 21.92 | CD2  | LEU | 206 |
| H | 0.143484  | 57.95 | 75.55 | 22.55 | 1HD2 | LEU | 206 |
| H | 0.154725  | 57.87 | 74.83 | 21.09 | 2HD2 | LEU | 206 |
| H | 0.239326  | 56.57 | 75.62 | 21.69 | 3HD2 | LEU | 206 |
| C | 0.512211  | 54.07 | 72.96 | 19.98 | C    | LEU | 206 |
| O | -0.509234 | 54.44 | 73.01 | 18.80 | O    | LEU | 206 |
| N | -0.447991 | 53.04 | 72.20 | 20.36 | N    | GLU | 207 |
| H | 0.314534  | 52.78 | 72.16 | 21.32 | H    | GLU | 207 |
| C | 0.038503  | 52.31 | 71.44 | 19.36 | CA   | GLU | 207 |
| H | -0.000950 | 52.98 | 70.90 | 18.85 | HA   | GLU | 207 |
| C | 0.090462  | 51.30 | 70.49 | 19.98 | CB   | GLU | 207 |
| H | 0.063833  | 50.49 | 71.01 | 20.25 | HB1  | GLU | 207 |
| H | -0.011191 | 51.70 | 70.07 | 20.79 | HB2  | GLU | 207 |
| C | -0.238008 | 50.88 | 69.40 | 19.01 | CG   | GLU | 207 |
| H | 0.095087  | 51.64 | 68.76 | 18.90 | HG1  | GLU | 207 |
| H | 0.048028  | 50.68 | 69.82 | 18.12 | HG2  | GLU | 207 |
| C | 0.624396  | 49.66 | 68.62 | 19.46 | CD   | GLU | 207 |
| O | -0.389404 | 49.49 | 68.40 | 20.68 | OE1  | GLU | 207 |
| O | -0.397066 | 48.87 | 68.20 | 18.57 | OE2  | GLU | 207 |
| C | 0.513886  | 51.58 | 72.46 | 18.49 | C    | GLU | 207 |
| O | -0.601846 | 51.37 | 72.25 | 17.30 | O    | GLU | 207 |
| N | -0.540075 | 51.17 | 73.56 | 19.13 | N    | ASN | 208 |
| H | 0.363801  | 51.33 | 73.65 | 20.11 | H    | ASN | 208 |
| C | 0.370638  | 50.49 | 74.65 | 18.43 | CA   | ASN | 208 |
| H | -0.103311 | 49.63 | 74.27 | 18.07 | HA   | ASN | 208 |
| C | -0.521614 | 50.20 | 75.82 | 19.38 | CB   | ASN | 208 |
| H | 0.157436  | 50.12 | 76.66 | 18.84 | HB1  | ASN | 208 |
| H | 0.244858  | 50.96 | 75.91 | 20.02 | HB2  | ASN | 208 |
| C | 0.880679  | 48.92 | 75.65 | 20.17 | CG   | ASN | 208 |
| O | -0.635108 | 48.66 | 76.42 | 21.09 | OD1  | ASN | 208 |
| N | -1.002065 | 48.12 | 74.65 | 19.83 | ND2  | ASN | 208 |
| H | 0.470572  | 48.37 | 74.05 | 19.07 | 1HD2 | ASN | 208 |
| H | 0.384822  | 47.26 | 74.50 | 20.32 | 2HD2 | ASN | 208 |
| C | 0.560131  | 51.41 | 75.15 | 17.33 | C    | ASN | 208 |
| O | -0.679363 | 50.99 | 75.40 | 16.20 | O    | ASN | 208 |
| N | -0.419431 | 52.69 | 75.32 | 17.66 | N    | LEU | 209 |
| H | 0.332560  | 52.99 | 75.10 | 18.59 | H    | LEU | 209 |
| C | 0.100430  | 53.65 | 75.81 | 16.69 | CA   | LEU | 209 |
| H | 0.038550  | 53.25 | 76.64 | 16.31 | HA   | LEU | 209 |
| C | -0.202731 | 54.98 | 76.13 | 17.37 | CB   | LEU | 209 |
| H | 0.063351  | 55.31 | 75.28 | 17.79 | HB1  | LEU | 209 |
| H | 0.109974  | 54.80 | 76.81 | 18.09 | HB2  | LEU | 209 |

|   |           |       |       |       |      |     |     |
|---|-----------|-------|-------|-------|------|-----|-----|
| C | 0.386462  | 56.08 | 76.67 | 16.47 | CG   | LEU | 209 |
| H | -0.073297 | 56.31 | 76.01 | 15.76 | HG   | LEU | 209 |
| C | -0.257601 | 55.60 | 77.94 | 15.79 | CD1  | LEU | 209 |
| H | 0.018680  | 56.33 | 78.30 | 15.20 | 1HD1 | LEU | 209 |
| H | 0.022049  | 54.80 | 77.74 | 15.23 | 2HD1 | LEU | 209 |
| H | 0.077142  | 55.37 | 78.63 | 16.47 | 3HD1 | LEU | 209 |
| C | -0.425467 | 57.32 | 76.94 | 17.31 | CD2  | LEU | 209 |
| H | 0.065766  | 58.04 | 77.30 | 16.72 | 1HD2 | LEU | 209 |
| H | 0.131124  | 57.10 | 77.61 | 18.02 | 2HD2 | LEU | 209 |
| H | 0.077039  | 57.62 | 76.09 | 17.73 | 3HD2 | LEU | 209 |
| C | 0.536615  | 53.87 | 74.79 | 15.58 | C    | LEU | 209 |
| O | -0.622113 | 53.95 | 75.14 | 14.40 | O    | LEU | 209 |
| N | -0.548795 | 53.96 | 73.53 | 15.97 | N    | ALA | 210 |
| H | 0.332893  | 53.89 | 73.31 | 16.94 | H    | ALA | 210 |
| C | 0.407930  | 54.16 | 72.45 | 15.01 | CA   | ALA | 210 |
| H | -0.040087 | 55.01 | 72.66 | 14.52 | HA   | ALA | 210 |
| C | -0.330246 | 54.29 | 71.13 | 15.74 | CB   | ALA | 210 |
| H | 0.038384  | 54.42 | 70.39 | 15.07 | HB1  | ALA | 210 |
| H | 0.085142  | 55.07 | 71.16 | 16.36 | HB2  | ALA | 210 |
| H | 0.106494  | 53.45 | 70.95 | 16.26 | HB3  | ALA | 210 |
| C | 0.462027  | 52.99 | 72.40 | 14.02 | C    | ALA | 210 |
| O | -0.549290 | 53.19 | 72.27 | 12.81 | O    | ALA | 210 |
| N | -0.445091 | 51.77 | 72.52 | 14.54 | N    | ASH | 211 |
| H | 0.366460  | 51.66 | 72.63 | 15.53 | H    | ASH | 211 |
| C | 0.110417  | 50.61 | 72.47 | 13.68 | CA   | ASH | 211 |
| H | 0.068586  | 50.72 | 71.63 | 13.15 | HA   | ASH | 211 |
| C | -0.303079 | 49.32 | 72.42 | 14.50 | CB   | ASH | 211 |
| H | 0.104214  | 48.54 | 72.60 | 13.90 | HB1  | ASH | 211 |
| H | 0.137272  | 49.36 | 73.12 | 15.21 | HB2  | ASH | 211 |
| C | 0.693442  | 49.11 | 71.06 | 15.17 | CG   | ASH | 211 |
| O | -0.578660 | 49.53 | 70.04 | 14.58 | OD1  | ASH | 211 |
| O | -0.526131 | 48.51 | 71.01 | 16.27 | OD2  | ASH | 211 |
| H | 0.417930  | 48.45 | 70.06 | 16.58 | HD2  | ASH | 211 |
| C | 0.532823  | 50.59 | 73.66 | 12.73 | C    | ASH | 211 |
| O | -0.640047 | 50.32 | 73.50 | 11.55 | O    | ASH | 211 |
| N | -0.569739 | 50.90 | 74.85 | 13.25 | N    | HIS | 212 |
| H | 0.358225  | 51.13 | 74.91 | 14.22 | H    | HIS | 212 |
| C | 0.386145  | 50.91 | 76.05 | 12.43 | CA   | HIS | 212 |
| H | -0.010365 | 49.99 | 76.16 | 12.08 | HA   | HIS | 212 |
| C | -0.268258 | 51.30 | 77.27 | 13.28 | CB   | HIS | 212 |
| H | 0.099945  | 52.22 | 77.12 | 13.65 | HB1  | HIS | 212 |
| H | 0.155639  | 50.65 | 77.36 | 14.04 | HB2  | HIS | 212 |
| C | -0.068068 | 51.32 | 78.56 | 12.53 | CG   | HIS | 212 |
| N | -0.440367 | 50.23 | 79.03 | 11.82 | ND1  | HIS | 212 |
| H | 0.414292  | 49.36 | 78.55 | 11.71 | HD1  | HIS | 212 |
| C | 0.442048  | 50.52 | 80.21 | 11.29 | CE1  | HIS | 212 |

|   |           |       |       |       |      |     |     |
|---|-----------|-------|-------|-------|------|-----|-----|
| H | 0.026965  | 49.91 | 80.76 | 10.73 | HE1  | HIS | 212 |
| N | -0.875656 | 51.75 | 80.53 | 11.64 | NE2  | HIS | 212 |
| C | 0.314038  | 52.28 | 79.51 | 12.41 | CD2  | HIS | 212 |
| H | 0.062461  | 53.19 | 79.49 | 12.81 | HD2  | HIS | 212 |
| C | 0.539673  | 51.90 | 75.88 | 11.28 | C    | HIS | 212 |
| O | -0.513173 | 51.56 | 76.11 | 10.13 | O    | HIS | 212 |
| N | -0.737523 | 53.12 | 75.46 | 11.61 | N    | LEU | 213 |
| H | 0.409870  | 53.34 | 75.28 | 12.57 | H    | LEU | 213 |
| C | 0.580960  | 54.14 | 75.26 | 10.58 | CA   | LEU | 213 |
| H | 0.027294  | 54.21 | 76.14 | 10.11 | HA   | LEU | 213 |
| C | -0.742793 | 55.48 | 74.90 | 11.23 | CB   | LEU | 213 |
| H | 0.190868  | 56.12 | 74.64 | 10.51 | HB1  | LEU | 213 |
| H | 0.183944  | 55.32 | 74.11 | 11.83 | HB2  | LEU | 213 |
| C | 0.622994  | 56.13 | 76.01 | 12.07 | CG   | LEU | 213 |
| H | -0.080769 | 55.45 | 76.38 | 12.71 | HG   | LEU | 213 |
| C | -0.324708 | 57.28 | 75.44 | 12.88 | CD1  | LEU | 213 |
| H | 0.051200  | 57.70 | 76.18 | 13.42 | 1HD1 | LEU | 213 |
| H | 0.068455  | 56.94 | 74.73 | 13.49 | 2HD1 | LEU | 213 |
| H | 0.059905  | 57.96 | 75.05 | 12.26 | 3HD1 | LEU | 213 |
| C | -0.480979 | 56.62 | 77.14 | 11.16 | CD2  | LEU | 213 |
| H | 0.091813  | 57.04 | 77.85 | 11.71 | 1HD2 | LEU | 213 |
| H | 0.089619  | 57.29 | 76.77 | 10.51 | 2HD2 | LEU | 213 |
| H | 0.115908  | 55.84 | 77.51 | 10.65 | 3HD2 | LEU | 213 |
| C | 0.104404  | 53.74 | 74.19 | 9.56  | C    | LEU | 213 |
| O | -0.323866 | 54.17 | 74.23 | 8.42  | O    | LEU | 213 |
| N | -0.710201 | 46.14 | 76.23 | 9.55  | N    | ASN | 219 |
| H | 0.350573  | 46.96 | 76.25 | 8.98  | H    | ASN | 219 |
| C | 0.483823  | 46.23 | 76.02 | 10.97 | CA   | ASN | 219 |
| H | -0.014393 | 45.30 | 75.77 | 11.24 | HA   | ASN | 219 |
| C | -0.478155 | 47.22 | 74.90 | 11.28 | CB   | ASN | 219 |
| H | 0.072502  | 47.19 | 74.71 | 12.27 | HB1  | ASN | 219 |
| H | 0.126337  | 48.14 | 75.20 | 11.03 | HB2  | ASN | 219 |
| C | 0.905784  | 46.90 | 73.62 | 10.53 | CG   | ASN | 219 |
| O | -0.583320 | 45.76 | 73.36 | 10.18 | OD1  | ASN | 219 |
| N | -1.064643 | 47.93 | 72.81 | 10.30 | ND2  | ASN | 219 |
| H | 0.494666  | 48.84 | 73.05 | 10.62 | 1HD2 | ASN | 219 |
| H | 0.414350  | 47.78 | 71.95 | 9.81  | 2HD2 | ASN | 219 |
| C | 0.482364  | 46.62 | 77.28 | 11.72 | C    | ASN | 219 |
| O | -0.531495 | 47.80 | 77.52 | 11.97 | O    | ASN | 219 |
| N | -0.587830 | 45.63 | 78.10 | 12.04 | N    | ASN | 220 |
| H | 0.341231  | 44.70 | 77.87 | 11.76 | H    | ASN | 220 |
| C | 0.254115  | 45.86 | 79.31 | 12.81 | CA   | ASN | 220 |
| H | 0.060214  | 46.61 | 79.13 | 13.44 | HA   | ASN | 220 |
| C | -0.326743 | 46.28 | 80.49 | 11.92 | CB   | ASN | 220 |
| H | 0.076790  | 47.15 | 80.27 | 11.47 | HB1  | ASN | 220 |
| H | 0.112953  | 46.40 | 81.31 | 12.48 | HB2  | ASN | 220 |

|   |           |       |       |       |      |     |      |
|---|-----------|-------|-------|-------|------|-----|------|
| C | 0.734711  | 45.27 | 80.80 | 10.85 | CG   | ASN | 220  |
| O | -0.555688 | 44.11 | 81.08 | 11.14 | OD1  | ASN | 220  |
| N | -0.980707 | 45.72 | 80.76 | 9.59  | ND2  | ASN | 220  |
| H | 0.416213  | 46.67 | 80.53 | 9.41  | 1HD2 | ASN | 220  |
| H | 0.413206  | 45.09 | 80.96 | 8.84  | 2HD2 | ASN | 220  |
| C | 0.512317  | 44.58 | 79.63 | 13.57 | C    | ASN | 220  |
| O | -0.477646 | 43.59 | 78.91 | 13.44 | O    | ASN | 220  |
| N | -0.708790 | 44.59 | 80.69 | 14.36 | N    | ALA | 221  |
| H | 0.405896  | 45.41 | 81.26 | 14.41 | H    | ALA | 221  |
| C | 0.590745  | 43.44 | 81.04 | 15.17 | CA   | ALA | 221  |
| H | 0.016899  | 43.38 | 80.27 | 15.80 | HA   | ALA | 221  |
| C | -0.638400 | 43.68 | 82.36 | 15.89 | CB   | ALA | 221  |
| H | 0.167692  | 42.88 | 82.59 | 16.45 | HB1  | ALA | 221  |
| H | 0.152061  | 44.48 | 82.27 | 16.49 | HB2  | ALA | 221  |
| H | 0.167614  | 43.85 | 83.08 | 15.22 | HB3  | ALA | 221  |
| C | 0.101252  | 42.10 | 81.09 | 14.45 | C    | ALA | 221  |
| O | -0.361214 | 41.09 | 80.69 | 15.03 | O    | ALA | 221  |
| N | -0.517379 | 39.35 | 78.40 | 14.84 | N    | PHE | 224  |
| H | 0.411689  | 39.97 | 79.19 | 14.84 | H    | PHE | 224  |
| C | 0.077480  | 38.49 | 78.17 | 15.99 | CA   | PHE | 224  |
| H | 0.084269  | 38.00 | 77.32 | 15.77 | HA   | PHE | 224  |
| C | -0.243187 | 39.31 | 78.01 | 17.27 | CB   | PHE | 224  |
| H | 0.087913  | 38.73 | 77.66 | 17.99 | HB1  | PHE | 224  |
| H | 0.090179  | 39.66 | 78.91 | 17.53 | HB2  | PHE | 224  |
| C | 0.284268  | 40.49 | 77.09 | 17.13 | CG   | PHE | 224  |
| C | -0.193293 | 41.68 | 77.53 | 16.56 | CD1  | PHE | 224  |
| H | 0.132498  | 41.76 | 78.48 | 16.25 | HD1  | PHE | 224  |
| C | -0.065278 | 42.77 | 76.67 | 16.42 | CE1  | PHE | 224  |
| H | 0.134134  | 43.63 | 77.01 | 16.02 | HE1  | PHE | 224  |
| C | -0.190620 | 42.67 | 75.35 | 16.84 | CZ   | PHE | 224  |
| H | 0.125289  | 43.45 | 74.73 | 16.74 | HZ   | PHE | 224  |
| C | -0.090476 | 41.48 | 74.90 | 17.40 | CE2  | PHE | 224  |
| H | 0.134519  | 41.41 | 73.95 | 17.71 | HE2  | PHE | 224  |
| C | -0.202361 | 40.40 | 75.76 | 17.54 | CD2  | PHE | 224  |
| H | 0.156496  | 39.55 | 75.43 | 17.95 | HD2  | PHE | 224  |
| C | 0.803272  | 37.49 | 79.31 | 16.19 | C    | PHE | 224  |
| O | -0.487555 | 37.39 | 80.01 | 15.49 | OC1  | PHE | 224  |
| O | -0.531856 | 36.80 | 79.37 | 17.21 | OC2  | PHE | 224  |
| C | 0.347900  | 70.83 | 96.64 | 15.61 | C1   | BNG | 5633 |
| C | 0.095100  | 70.05 | 97.93 | 15.93 | C2   | BNG | 5633 |
| C | 0.107100  | 71.00 | 98.94 | 16.61 | C3   | BNG | 5633 |
| C | 0.086100  | 71.66 | 98.31 | 17.85 | C4   | BNG | 5633 |
| C | 0.115100  | 72.36 | 96.99 | 17.45 | C5   | BNG | 5633 |
| C | 0.125400  | 72.95 | 96.24 | 18.64 | C6   | BNG | 5633 |
| C | 0.129400  | 69.13 | 94.90 | 15.87 | C1   | BNG | 5633 |
| C | -0.084400 | 68.20 | 93.99 | 15.10 | C2   | BNG | 5633 |

|   |           |       |        |       |     |     |      |
|---|-----------|-------|--------|-------|-----|-----|------|
| C | -0.078400 | 67.56 | 92.98  | 16.03 | C3  | BNG | 5633 |
| C | -0.078400 | 66.12 | 92.71  | 15.66 | C4  | BNG | 5633 |
| C | -0.079400 | 65.35 | 92.16  | 16.85 | C5  | BNG | 5633 |
| C | -0.079400 | 64.85 | 90.75  | 16.57 | C6  | BNG | 5633 |
| C | -0.078400 | 63.63 | 90.41  | 17.40 | C7  | BNG | 5633 |
| C | -0.079400 | 62.48 | 89.96  | 16.50 | C8  | BNG | 5633 |
| C | -0.092100 | 62.18 | 88.48  | 16.65 | C9  | BNG | 5633 |
| O | -0.392600 | 69.99 | 95.68  | 15.02 | O1  | BNG | 5633 |
| O | -0.583800 | 69.53 | 98.50  | 14.74 | O2  | BNG | 5633 |
| O | -0.608800 | 70.27 | 100.10 | 17.00 | O3  | BNG | 5633 |
| O | -0.610800 | 72.62 | 99.22  | 18.39 | O4  | BNG | 5633 |
| O | -0.444600 | 71.42 | 96.09  | 16.81 | O5  | BNG | 5633 |
| O | -0.615800 | 74.18 | 96.81  | 19.06 | O6  | BNG | 5633 |
| H | 0.091700  | 71.56 | 96.79  | 14.94 | H1  | BNG | 5633 |
| H | 0.062700  | 69.24 | 97.75  | 16.50 | H2  | BNG | 5633 |
| H | 0.064700  | 71.69 | 99.26  | 15.97 | H3  | BNG | 5633 |
| H | 0.057700  | 71.00 | 98.16  | 18.58 | H4  | BNG | 5633 |
| H | 0.070700  | 73.09 | 97.22  | 16.81 | H5  | BNG | 5633 |
| H | 0.046200  | 73.13 | 95.29  | 18.40 | H61 | BNG | 5633 |
| H | 0.046200  | 72.32 | 96.28  | 19.42 | H62 | BNG | 5633 |
| H | 0.038200  | 69.71 | 94.35  | 16.48 | 1H1 | BNG | 5633 |
| H | 0.038200  | 68.59 | 95.54  | 16.42 | 2H1 | BNG | 5633 |
| H | 0.056200  | 68.73 | 93.51  | 14.39 | 1H2 | BNG | 5633 |
| H | 0.056200  | 67.49 | 94.54  | 14.66 | 2H2 | BNG | 5633 |
| H | 0.039700  | 67.60 | 93.33  | 16.96 | 1H3 | BNG | 5633 |
| H | 0.039700  | 68.08 | 92.12  | 15.97 | 2H3 | BNG | 5633 |
| H | 0.041700  | 66.09 | 92.04  | 14.91 | 1H4 | BNG | 5633 |
| H | 0.041700  | 65.70 | 93.56  | 15.36 | 2H4 | BNG | 5633 |
| H | 0.039200  | 64.57 | 92.75  | 17.03 | 1H5 | BNG | 5633 |
| H | 0.039200  | 65.95 | 92.14  | 17.65 | 2H5 | BNG | 5633 |
| H | 0.040200  | 65.57 | 90.10  | 16.78 | 1H6 | BNG | 5633 |
| H | 0.040200  | 64.61 | 90.68  | 15.60 | 2H6 | BNG | 5633 |
| H | 0.038700  | 63.35 | 91.21  | 17.92 | 1H7 | BNG | 5633 |
| H | 0.038700  | 63.86 | 89.67  | 18.03 | 2H7 | BNG | 5633 |
| H | 0.038200  | 62.73 | 90.14  | 15.55 | 1H8 | BNG | 5633 |
| H | 0.038200  | 61.67 | 90.48  | 16.74 | 2H8 | BNG | 5633 |
| H | 0.032370  | 61.20 | 88.34  | 16.60 | 1H9 | BNG | 5633 |
| H | 0.032370  | 62.63 | 87.97  | 15.92 | 2H9 | BNG | 5633 |
| H | 0.032370  | 62.52 | 88.16  | 17.54 | 3H9 | BNG | 5633 |
| H | 0.423000  | 68.91 | 97.84  | 14.30 | H22 | BNG | 5633 |
| H | 0.428000  | 69.84 | 100.51 | 16.19 | H32 | BNG | 5633 |
| H | 0.433000  | 72.16 | 100.07 | 18.65 | H42 | BNG | 5633 |
| H | 0.415000  | 74.54 | 96.30  | 19.84 | H63 | BNG | 5633 |
| C | 0.815510  | 55.95 | 80.37  | 20.78 | C1  | LUT | 5620 |
| C | -0.471741 | 54.90 | 79.41  | 20.19 | C2  | LUT | 5620 |
| C | 0.040331  | 53.42 | 79.69  | 20.44 | C3  | LUT | 5620 |

|   |           |       |       |       |     |     |      |
|---|-----------|-------|-------|-------|-----|-----|------|
| C | 0.105178  | 53.12 | 80.60 | 21.63 | C4  | LUT | 5620 |
| C | 0.602543  | 54.10 | 81.66 | 22.00 | C5  | LUT | 5620 |
| C | -0.048599 | 55.43 | 81.58 | 21.61 | C6  | LUT | 5620 |
| C | -0.535350 | 56.40 | 82.63 | 21.97 | C7  | LUT | 5620 |
| C | 0.117818  | 56.99 | 82.79 | 23.18 | C8  | LUT | 5620 |
| C | 0.135238  | 57.87 | 83.89 | 23.58 | C9  | LUT | 5620 |
| C | 0.464246  | 58.44 | 83.82 | 24.80 | C10 | LUT | 5620 |
| C | -0.700900 | 59.35 | 84.77 | 25.39 | C11 | LUT | 5620 |
| C | 0.059428  | 59.98 | 84.47 | 26.53 | C12 | LUT | 5620 |
| C | 0.130150  | 60.96 | 85.25 | 27.28 | C13 | LUT | 5620 |
| C | -0.318989 | 61.53 | 84.66 | 28.35 | C14 | LUT | 5620 |
| C | 0.164090  | 62.58 | 85.17 | 29.19 | C15 | LUT | 5620 |
| C | 0.252948  | 56.83 | 80.85 | 19.60 | C16 | LUT | 5620 |
| C | -0.390205 | 56.81 | 79.46 | 21.67 | C17 | LUT | 5620 |
| C | 0.174179  | 53.40 | 82.72 | 22.79 | C18 | LUT | 5620 |
| C | 0.066555  | 58.10 | 85.01 | 22.59 | C19 | LUT | 5620 |
| C | 0.108737  | 61.33 | 86.60 | 26.76 | C20 | LUT | 5620 |
| O | -0.382551 | 52.71 | 78.47 | 20.56 | O3  | LUT | 5620 |
| C | 0.177063  | 72.83 | 86.66 | 36.72 | C21 | LUT | 5620 |
| C | 0.293258  | 73.98 | 87.44 | 37.39 | C22 | LUT | 5620 |
| C | -0.376104 | 73.74 | 87.80 | 38.86 | C23 | LUT | 5620 |
| C | 0.159635  | 72.31 | 88.27 | 39.11 | C24 | LUT | 5620 |
| C | -0.045027 | 71.29 | 88.03 | 38.26 | C25 | LUT | 5620 |
| C | 0.129233  | 71.41 | 87.28 | 36.94 | C26 | LUT | 5620 |
| C | -0.409277 | 70.24 | 86.32 | 36.80 | C27 | LUT | 5620 |
| C | 0.067767  | 69.38 | 86.35 | 35.75 | C28 | LUT | 5620 |
| C | 0.090271  | 68.32 | 85.39 | 35.43 | C29 | LUT | 5620 |
| C | 0.101005  | 67.58 | 85.61 | 34.33 | C30 | LUT | 5620 |
| C | -0.310158 | 66.54 | 84.77 | 33.82 | C31 | LUT | 5620 |
| C | 0.046405  | 65.83 | 85.11 | 32.72 | C32 | LUT | 5620 |
| C | 0.080772  | 64.73 | 84.39 | 32.08 | C33 | LUT | 5620 |
| C | 0.055829  | 64.15 | 84.96 | 31.00 | C34 | LUT | 5620 |
| C | -0.417257 | 63.06 | 84.46 | 30.21 | C35 | LUT | 5620 |
| C | 0.111255  | 72.87 | 85.20 | 37.26 | C36 | LUT | 5620 |
| C | 0.117979  | 73.13 | 86.61 | 35.22 | C37 | LUT | 5620 |
| C | 0.113858  | 69.98 | 88.60 | 38.69 | C38 | LUT | 5620 |
| C | -0.309136 | 68.13 | 84.21 | 36.36 | C39 | LUT | 5620 |
| C | 0.077081  | 64.32 | 83.07 | 32.67 | C40 | LUT | 5620 |
| O | 0.097024  | 74.68 | 88.78 | 39.29 | O23 | LUT | 5620 |
| H | 0.101630  | 55.42 | 79.85 | 19.45 | H21 | LUT | 5620 |
| H | -0.320606 | 55.33 | 78.54 | 20.43 | H22 | LUT | 5620 |
| H | 0.085263  | 53.07 | 80.14 | 19.62 | H3  | LUT | 5620 |
| H | 0.099341  | 52.25 | 81.06 | 21.45 | H41 | LUT | 5620 |
| H | 0.103581  | 53.02 | 80.02 | 22.44 | H42 | LUT | 5620 |
| H | -0.677433 | 56.64 | 83.28 | 21.26 | H7  | LUT | 5620 |
| H | 0.378201  | 56.81 | 82.09 | 23.86 | H8  | LUT | 5620 |

|   |           |       |       |       |      |     |      |
|---|-----------|-------|-------|-------|------|-----|------|
| H | 0.305849  | 58.22 | 83.02 | 25.36 | H10  | LUT | 5620 |
| H | -0.174659 | 59.50 | 85.66 | 24.94 | H11  | LUT | 5620 |
| H | 0.079653  | 59.74 | 83.59 | 26.93 | H12  | LUT | 5620 |
| H | 0.050933  | 61.18 | 83.75 | 28.59 | H14  | LUT | 5620 |
| H | 0.502133  | 62.95 | 86.08 | 29.01 | H15  | LUT | 5620 |
| H | -0.037253 | 57.52 | 81.48 | 19.94 | 1H16 | LUT | 5620 |
| H | -0.482636 | 57.27 | 80.07 | 19.17 | 2H16 | LUT | 5620 |
| H | 0.169329  | 56.25 | 81.32 | 18.93 | 3H16 | LUT | 5620 |
| H | 0.206914  | 57.53 | 80.00 | 22.10 | 1H17 | LUT | 5620 |
| H | -0.331135 | 56.23 | 79.04 | 22.37 | 2H17 | LUT | 5620 |
| H | 0.141044  | 57.22 | 78.74 | 21.11 | 3H17 | LUT | 5620 |
| H | 0.221112  | 52.44 | 82.47 | 22.90 | 1H18 | LUT | 5620 |
| H | 0.063455  | 53.83 | 82.79 | 23.69 | 2H18 | LUT | 5620 |
| H | -0.466037 | 53.47 | 83.59 | 22.31 | 3H18 | LUT | 5620 |
| H | 0.165420  | 57.57 | 84.84 | 21.77 | 1H19 | LUT | 5620 |
| H | 0.287084  | 57.83 | 85.88 | 23.00 | 2H19 | LUT | 5620 |
| H | -0.334675 | 59.08 | 85.05 | 22.36 | 3H19 | LUT | 5620 |
| H | 0.167713  | 60.77 | 86.82 | 25.96 | 1H20 | LUT | 5620 |
| H | -0.012535 | 61.17 | 87.29 | 27.47 | 2H20 | LUT | 5620 |
| H | 0.127030  | 62.30 | 86.61 | 26.51 | 3H20 | LUT | 5620 |
| H | -0.338222 | 51.74 | 78.67 | 20.73 | H5   | LUT | 5620 |
| H | 0.164369  | 74.13 | 88.29 | 36.88 | 1H22 | LUT | 5620 |
| H | 0.288503  | 74.81 | 86.88 | 37.34 | 2H22 | LUT | 5620 |
| H | -0.363234 | 73.93 | 87.00 | 39.43 | H23  | LUT | 5620 |
| H | 0.152035  | 72.12 | 88.78 | 39.95 | H24  | LUT | 5620 |
| H | -0.070268 | 71.31 | 87.93 | 36.19 | H26  | LUT | 5620 |
| H | 0.136632  | 70.10 | 85.64 | 37.51 | H27  | LUT | 5620 |
| H | -0.311260 | 69.49 | 87.12 | 35.12 | H28  | LUT | 5620 |
| H | 0.064038  | 67.78 | 86.44 | 33.81 | H30  | LUT | 5620 |
| H | 0.088988  | 66.33 | 83.90 | 34.28 | H31  | LUT | 5620 |
| H | 0.051876  | 66.09 | 85.98 | 32.30 | H32  | LUT | 5620 |
| H | -0.353107 | 64.52 | 85.85 | 30.72 | H34  | LUT | 5620 |
| H | 0.090642  | 62.67 | 83.57 | 30.43 | H35  | LUT | 5620 |
| H | 0.071415  | 72.13 | 84.66 | 36.84 | 1H36 | LUT | 5620 |
| H | 0.093345  | 73.75 | 84.78 | 37.02 | 2H36 | LUT | 5620 |
| H | -0.299399 | 72.77 | 85.20 | 38.25 | 3H36 | LUT | 5620 |
| H | 0.100882  | 72.40 | 86.11 | 34.75 | 1H37 | LUT | 5620 |
| H | 0.084558  | 73.18 | 87.54 | 34.86 | 2H37 | LUT | 5620 |
| H | 0.061608  | 74.00 | 86.14 | 35.07 | 3H37 | LUT | 5620 |
| H | -0.333872 | 70.10 | 89.06 | 39.58 | 1H38 | LUT | 5620 |
| H | 0.086513  | 69.67 | 89.26 | 38.01 | 2H38 | LUT | 5620 |
| H | 0.103858  | 69.31 | 87.87 | 38.78 | 3H38 | LUT | 5620 |
| H | 0.097753  | 68.79 | 84.26 | 37.11 | 1H39 | LUT | 5620 |
| H | -0.337608 | 67.20 | 84.24 | 36.74 | 2H39 | LUT | 5620 |
| H | 0.090790  | 68.26 | 83.36 | 35.86 | 3H39 | LUT | 5620 |
| H | 0.109312  | 64.90 | 82.86 | 33.45 | 1H40 | LUT | 5620 |



|   |           |       |        |       |      |     |      |
|---|-----------|-------|--------|-------|------|-----|------|
| H | 0.103139  | 63.36 | 83.13  | 32.96 | 2H40 | LUT | 5620 |
| H | -0.686816 | 64.41 | 82.35  | 31.98 | 3H40 | LUT | 5620 |
| H | 0.394721  | 74.51 | 89.00  | 40.25 | H33  | LUT | 5620 |
| C | 0.815510  | 52.85 | 76.78  | 36.24 | C1   | LUT | 5621 |
| C | -0.471741 | 52.83 | 75.27  | 36.00 | C2   | LUT | 5621 |
| C | 0.040331  | 53.91 | 74.60  | 35.15 | C3   | LUT | 5621 |
| C | 0.105178  | 55.00 | 75.54  | 34.61 | C4   | LUT | 5621 |
| C | 0.602543  | 55.10 | 76.96  | 35.06 | C5   | LUT | 5621 |
| C | -0.048599 | 54.12 | 77.59  | 35.82 | C6   | LUT | 5621 |
| C | -0.535350 | 54.18 | 79.00  | 36.28 | C7   | LUT | 5621 |
| C | 0.117818  | 53.87 | 80.08  | 35.52 | C8   | LUT | 5621 |
| C | 0.135238  | 53.93 | 81.51  | 35.87 | C9   | LUT | 5621 |
| C | 0.464246  | 53.44 | 82.40  | 34.97 | C10  | LUT | 5621 |
| C | -0.700900 | 53.32 | 83.82  | 35.13 | C11  | LUT | 5621 |
| C | 0.059428  | 52.72 | 84.61  | 34.21 | C12  | LUT | 5621 |
| C | 0.130150  | 52.44 | 86.07  | 34.29 | C13  | LUT | 5621 |
| C | -0.318989 | 51.78 | 86.65  | 33.26 | C14  | LUT | 5621 |
| C | 0.164090  | 51.35 | 88.02  | 33.16 | C15  | LUT | 5621 |
| C | 0.252948  | 52.56 | 76.98  | 37.74 | C16  | LUT | 5621 |
| C | -0.390205 | 51.62 | 77.30  | 35.45 | C17  | LUT | 5621 |
| C | 0.174179  | 56.38 | 77.53  | 34.57 | C18  | LUT | 5621 |
| C | 0.066555  | 54.44 | 81.88  | 37.23 | C19  | LUT | 5621 |
| C | 0.108737  | 52.86 | 86.80  | 35.53 | C20  | LUT | 5621 |
| O | -0.382551 | 53.33 | 73.85  | 34.09 | O3   | LUT | 5621 |
| C | 0.177063  | 46.54 | 99.60  | 29.99 | C21  | LUT | 5621 |
| C | 0.293258  | 46.27 | 101.11 | 30.16 | C22  | LUT | 5621 |
| C | -0.376104 | 47.22 | 102.04 | 29.39 | C23  | LUT | 5621 |
| C | 0.159635  | 48.68 | 101.55 | 29.38 | C24  | LUT | 5621 |
| C | -0.045027 | 49.01 | 100.29 | 29.74 | C25  | LUT | 5621 |
| C | 0.129233  | 48.03 | 99.20  | 30.20 | C26  | LUT | 5621 |
| C | -0.409277 | 48.40 | 97.85  | 29.60 | C27  | LUT | 5621 |
| C | 0.067767  | 48.60 | 96.71  | 30.31 | C28  | LUT | 5621 |
| C | 0.090271  | 48.75 | 95.35  | 29.77 | C29  | LUT | 5621 |
| C | 0.101005  | 48.98 | 94.34  | 30.64 | C30  | LUT | 5621 |
| C | -0.310158 | 49.16 | 92.94  | 30.30 | C31  | LUT | 5621 |
| C | 0.046405  | 49.57 | 92.02  | 31.20 | C32  | LUT | 5621 |
| C | 0.080772  | 49.84 | 90.59  | 31.00 | C33  | LUT | 5621 |
| C | 0.055829  | 50.36 | 89.91  | 32.04 | C34  | LUT | 5621 |
| C | -0.417257 | 50.75 | 88.52  | 32.07 | C35  | LUT | 5621 |
| C | 0.111255  | 46.04 | 99.21  | 28.57 | C36  | LUT | 5621 |
| C | 0.117979  | 45.66 | 98.84  | 31.00 | C37  | LUT | 5621 |
| C | 0.113858  | 50.47 | 100.03 | 29.67 | C38  | LUT | 5621 |
| C | -0.309136 | 48.71 | 95.17  | 28.29 | C39  | LUT | 5621 |
| C | 0.077081  | 49.60 | 90.02  | 29.64 | C40  | LUT | 5621 |
| O | 0.097024  | 47.14 | 103.36 | 29.90 | O23  | LUT | 5621 |
| H | 0.101630  | 52.80 | 75.19  | 37.00 | H21  | LUT | 5621 |

|   |           |       |        |       |      |     |      |
|---|-----------|-------|--------|-------|------|-----|------|
| H | -0.320606 | 51.91 | 75.45  | 35.65 | H22  | LUT | 5621 |
| H | 0.085263  | 54.37 | 73.94  | 35.74 | H3   | LUT | 5621 |
| H | 0.099341  | 55.88 | 75.13  | 34.83 | H41  | LUT | 5621 |
| H | 0.103581  | 54.89 | 75.58  | 33.62 | H42  | LUT | 5621 |
| H | -0.677433 | 54.46 | 79.17  | 37.23 | H7   | LUT | 5621 |
| H | 0.378201  | 53.56 | 79.88  | 34.59 | H8   | LUT | 5621 |
| H | 0.305849  | 53.14 | 82.02  | 34.09 | H10  | LUT | 5621 |
| H | -0.174659 | 53.69 | 84.25  | 35.96 | H11  | LUT | 5621 |
| H | 0.079653  | 52.43 | 84.15  | 33.36 | H12  | LUT | 5621 |
| H | 0.050933  | 51.57 | 86.06  | 32.48 | H14  | LUT | 5621 |
| H | 0.502133  | 51.51 | 88.63  | 33.93 | H15  | LUT | 5621 |
| H | -0.037253 | 52.56 | 77.95  | 37.96 | 1H16 | LUT | 5621 |
| H | -0.482636 | 51.66 | 76.59  | 37.96 | 2H16 | LUT | 5621 |
| H | 0.169329  | 53.26 | 76.51  | 38.28 | 3H16 | LUT | 5621 |
| H | 0.206914  | 51.55 | 78.29  | 35.55 | 1H17 | LUT | 5621 |
| H | -0.331135 | 51.73 | 77.06  | 34.48 | 2H17 | LUT | 5621 |
| H | 0.141044  | 50.79 | 76.87  | 35.81 | 3H17 | LUT | 5621 |
| H | 0.221112  | 56.87 | 76.84  | 34.05 | 1H18 | LUT | 5621 |
| H | 0.063455  | 56.19 | 78.32  | 33.98 | 2H18 | LUT | 5621 |
| H | -0.466037 | 56.94 | 77.83  | 35.35 | 3H18 | LUT | 5621 |
| H | 0.165420  | 54.74 | 81.06  | 37.70 | 1H19 | LUT | 5621 |
| H | 0.287084  | 55.21 | 82.51  | 37.13 | 2H19 | LUT | 5621 |
| H | -0.334675 | 53.71 | 82.32  | 37.75 | 3H19 | LUT | 5621 |
| H | 0.167713  | 53.32 | 86.17  | 36.15 | 1H20 | LUT | 5621 |
| H | -0.012535 | 53.48 | 87.54  | 35.28 | 2H20 | LUT | 5621 |
| H | 0.127030  | 52.05 | 87.18  | 35.99 | 3H20 | LUT | 5621 |
| H | -0.338222 | 54.05 | 73.43  | 33.55 | H5   | LUT | 5621 |
| H | 0.164369  | 46.35 | 101.34 | 31.13 | 1H22 | LUT | 5621 |
| H | 0.288503  | 45.34 | 101.30 | 29.85 | 2H22 | LUT | 5621 |
| H | -0.363234 | 46.90 | 102.10 | 28.44 | H23  | LUT | 5621 |
| H | 0.152035  | 49.40 | 102.18 | 29.10 | H24  | LUT | 5621 |
| H | -0.070268 | 48.15 | 99.10  | 31.18 | H26  | LUT | 5621 |
| H | 0.136632  | 48.51 | 97.79  | 28.61 | H27  | LUT | 5621 |
| H | -0.311260 | 48.64 | 96.80  | 31.30 | H28  | LUT | 5621 |
| H | 0.064038  | 49.04 | 94.57  | 31.61 | H30  | LUT | 5621 |
| H | 0.088988  | 48.97 | 92.65  | 29.36 | H31  | LUT | 5621 |
| H | 0.051876  | 49.71 | 92.36  | 32.13 | H32  | LUT | 5621 |
| H | -0.353107 | 50.48 | 90.42  | 32.89 | H34  | LUT | 5621 |
| H | 0.090642  | 50.58 | 87.94  | 31.28 | H35  | LUT | 5621 |
| H | 0.071415  | 46.20 | 98.23  | 28.42 | 1H36 | LUT | 5621 |
| H | 0.093345  | 45.07 | 99.41  | 28.49 | 2H36 | LUT | 5621 |
| H | -0.299399 | 46.55 | 99.74  | 27.89 | 3H36 | LUT | 5621 |
| H | 0.100882  | 45.82 | 97.86  | 30.91 | 1H37 | LUT | 5621 |
| H | 0.084558  | 45.89 | 99.13  | 31.93 | 2H37 | LUT | 5621 |
| H | 0.061608  | 44.70 | 99.04  | 30.83 | 3H37 | LUT | 5621 |
| H | -0.333872 | 50.94 | 100.85 | 29.35 | 1H38 | LUT | 5621 |

|   |           |       |        |       |      |     |      |
|---|-----------|-------|--------|-------|------|-----|------|
| H | 0.086513  | 50.81 | 99.78  | 30.58 | 2H38 | LUT | 5621 |
| H | 0.103858  | 50.65 | 99.28  | 29.03 | 3H38 | LUT | 5621 |
| H | 0.097753  | 48.53 | 96.06  | 27.85 | 1H39 | LUT | 5621 |
| H | -0.337608 | 49.60 | 94.82  | 27.97 | 2H39 | LUT | 5621 |
| H | 0.090790  | 47.99 | 94.53  | 28.05 | 3H39 | LUT | 5621 |
| H | 0.109312  | 49.22 | 90.72  | 29.04 | 1H40 | LUT | 5621 |
| H | 0.103139  | 50.47 | 89.69  | 29.25 | 2H40 | LUT | 5621 |
| H | -0.686816 | 48.96 | 89.25  | 29.70 | 3H40 | LUT | 5621 |
| H | 0.394721  | 47.76 | 103.95 | 29.39 | H33  | LUT | 5621 |
| C | 0.000200  | 68.39 | 81.10  | 61.70 | C1   | NEX | 5623 |
| C | -0.105400 | 67.66 | 82.05  | 62.67 | C2   | NEX | 5623 |
| C | 0.137100  | 68.20 | 83.47  | 62.88 | C3   | NEX | 5623 |
| C | -0.138400 | 68.51 | 84.15  | 61.53 | C4   | NEX | 5623 |
| C | 0.210000  | 69.33 | 83.34  | 60.51 | C5   | NEX | 5623 |
| C | -0.160500 | 68.69 | 81.91  | 60.38 | C6   | NEX | 5623 |
| C | -0.147100 | 67.84 | 80.94  | 57.92 | C8   | NEX | 5623 |
| C | -0.059200 | 66.45 | 81.01  | 57.42 | C9   | NEX | 5623 |
| C | -0.133000 | 66.21 | 80.55  | 56.18 | C10  | NEX | 5623 |
| C | -0.129000 | 65.03 | 80.75  | 55.39 | C11  | NEX | 5623 |
| C | -0.121000 | 64.92 | 80.26  | 54.14 | C12  | NEX | 5623 |
| C | -0.068200 | 63.82 | 80.41  | 53.22 | C13  | NEX | 5623 |
| C | -0.126000 | 63.98 | 79.87  | 51.99 | C14  | NEX | 5623 |
| C | -0.125000 | 63.08 | 79.96  | 50.88 | C15  | NEX | 5623 |
| C | -0.088600 | 67.48 | 79.88  | 61.47 | C16  | NEX | 5623 |
| C | -0.088600 | 69.70 | 80.60  | 62.32 | C17  | NEX | 5623 |
| C | -0.086100 | 69.36 | 84.11  | 59.18 | C18  | NEX | 5623 |
| C | -0.063900 | 65.47 | 81.85  | 58.20 | C19  | NEX | 5623 |
| C | -0.061900 | 62.63 | 81.20  | 53.66 | C20  | NEX | 5623 |
| O | -0.591800 | 67.23 | 84.25  | 63.57 | O3   | NEX | 5623 |
| O | -0.590800 | 70.67 | 83.23  | 60.98 | O4   | NEX | 5623 |
| C | -0.025000 | 62.87 | 76.47  | 39.41 | C21  | NEX | 5623 |
| C | -0.071400 | 62.88 | 75.37  | 38.33 | C22  | NEX | 5623 |
| C | 0.141100  | 62.49 | 73.96  | 38.75 | C23  | NEX | 5623 |
| C | -0.101400 | 61.16 | 73.83  | 39.49 | C24  | NEX | 5623 |
| C | 0.096800  | 60.90 | 74.94  | 40.48 | C25  | NEX | 5623 |
| C | 0.123000  | 61.70 | 76.24  | 40.47 | C26  | NEX | 5623 |
| C | -0.158200 | 61.07 | 77.48  | 41.04 | C27  | NEX | 5623 |
| C | -0.108000 | 61.20 | 78.02  | 42.26 | C28  | NEX | 5623 |
| C | -0.075200 | 60.46 | 79.18  | 42.83 | C29  | NEX | 5623 |
| C | -0.123000 | 60.73 | 79.57  | 44.10 | C30  | NEX | 5623 |
| C | -0.127000 | 61.71 | 79.03  | 45.00 | C31  | NEX | 5623 |
| C | -0.124000 | 61.77 | 79.45  | 46.28 | C32  | NEX | 5623 |
| C | -0.064200 | 62.74 | 79.08  | 47.32 | C33  | NEX | 5623 |
| C | -0.131000 | 62.56 | 79.59  | 48.56 | C34  | NEX | 5623 |
| C | -0.120000 | 63.39 | 79.39  | 49.71 | C35  | NEX | 5623 |
| C | -0.087100 | 62.72 | 77.82  | 38.69 | C36  | NEX | 5623 |

|   |           |       |       |       |      |     |      |
|---|-----------|-------|-------|-------|------|-----|------|
| C | -0.087100 | 64.21 | 76.44 | 40.14 | C37  | NEX | 5623 |
| C | -0.086100 | 59.51 | 74.86 | 41.06 | C38  | NEX | 5623 |
| C | -0.062900 | 59.43 | 79.84 | 41.98 | C39  | NEX | 5623 |
| C | -0.063900 | 63.86 | 78.16 | 46.94 | C40  | NEX | 5623 |
| O | -0.599800 | 62.49 | 73.08 | 37.63 | O23  | NEX | 5623 |
| O | -0.403600 | 61.95 | 75.18 | 41.42 | O24  | NEX | 5623 |
| H | 0.052700  | 66.72 | 82.14 | 62.34 | H21  | NEX | 5623 |
| H | 0.052700  | 67.65 | 81.61 | 63.57 | H22  | NEX | 5623 |
| H | 0.074700  | 69.01 | 83.45 | 63.46 | H3   | NEX | 5623 |
| H | 0.062200  | 67.63 | 84.38 | 61.09 | H41  | NEX | 5623 |
| H | 0.062200  | 69.01 | 85.00 | 61.72 | H42  | NEX | 5623 |
| H | 0.143000  | 68.51 | 80.52 | 57.32 | H8   | NEX | 5623 |
| H | 0.124000  | 66.93 | 80.00 | 55.76 | H10  | NEX | 5623 |
| H | 0.127000  | 64.26 | 81.27 | 55.78 | H11  | NEX | 5623 |
| H | 0.123000  | 65.70 | 79.73 | 53.81 | H12  | NEX | 5623 |
| H | 0.122000  | 64.81 | 79.35 | 51.84 | H14  | NEX | 5623 |
| H | 0.125000  | 62.21 | 80.44 | 50.98 | H15  | NEX | 5623 |
| H | 0.040030  | 67.93 | 79.25 | 60.84 | 1H16 | NEX | 5623 |
| H | 0.040030  | 67.31 | 79.43 | 62.34 | 2H16 | NEX | 5623 |
| H | 0.040030  | 66.61 | 80.19 | 61.08 | 3H16 | NEX | 5623 |
| H | 0.040030  | 70.16 | 79.99 | 61.68 | 1H17 | NEX | 5623 |
| H | 0.040030  | 70.29 | 81.38 | 62.53 | 2H17 | NEX | 5623 |
| H | 0.040030  | 69.50 | 80.10 | 63.17 | 3H17 | NEX | 5623 |
| H | 0.049030  | 69.78 | 85.01 | 59.32 | 1H18 | NEX | 5623 |
| H | 0.049030  | 69.89 | 83.60 | 58.51 | 2H18 | NEX | 5623 |
| H | 0.049030  | 68.42 | 84.23 | 58.84 | 3H18 | NEX | 5623 |
| H | 0.046370  | 65.87 | 82.08 | 59.09 | 1H19 | NEX | 5623 |
| H | 0.046370  | 65.28 | 82.70 | 57.70 | 2H19 | NEX | 5623 |
| H | 0.046370  | 64.62 | 81.34 | 58.33 | 3H19 | NEX | 5623 |
| H | 0.045030  | 62.75 | 81.49 | 54.61 | 1H20 | NEX | 5623 |
| H | 0.045030  | 62.52 | 82.00 | 53.08 | 2H20 | NEX | 5623 |
| H | 0.045030  | 61.81 | 80.62 | 53.60 | 3H20 | NEX | 5623 |
| H | 0.397000  | 67.02 | 83.81 | 64.45 | H5   | NEX | 5623 |
| H | 0.401000  | 71.07 | 84.14 | 61.06 | H4   | NEX | 5623 |
| H | 0.058700  | 63.80 | 75.33 | 37.95 | 1H22 | NEX | 5623 |
| H | 0.058700  | 62.24 | 75.65 | 37.61 | 2H22 | NEX | 5623 |
| H | 0.050700  | 63.21 | 73.64 | 39.36 | H23  | NEX | 5623 |
| H | 0.060200  | 61.16 | 72.97 | 40.00 | 1H24 | NEX | 5623 |
| H | 0.060200  | 60.42 | 73.83 | 38.82 | 2H24 | NEX | 5623 |
| H | 0.135000  | 60.46 | 77.98 | 40.42 | H27  | NEX | 5623 |
| H | 0.141000  | 61.88 | 77.59 | 42.86 | H28  | NEX | 5623 |
| H | 0.123000  | 60.17 | 80.32 | 44.45 | H30  | NEX | 5623 |
| H | 0.131000  | 62.36 | 78.35 | 44.68 | H31  | NEX | 5623 |
| H | 0.122000  | 61.06 | 80.10 | 46.56 | H32  | NEX | 5623 |
| H | 0.121000  | 61.76 | 80.17 | 48.69 | H34  | NEX | 5623 |
| H | 0.126000  | 64.21 | 78.82 | 49.63 | H35  | NEX | 5623 |

|   |           |       |        |       |      |     |      |
|---|-----------|-------|--------|-------|------|-----|------|
| H | 0.041530  | 62.71 | 78.56  | 39.37 | 1H36 | NEX | 5623 |
| H | 0.041530  | 63.49 | 77.95  | 38.07 | 2H36 | NEX | 5623 |
| H | 0.041530  | 61.87 | 77.84  | 38.18 | 3H36 | NEX | 5623 |
| H | 0.041530  | 64.23 | 77.14  | 40.85 | 1H37 | NEX | 5623 |
| H | 0.041530  | 64.35 | 75.54  | 40.56 | 2H37 | NEX | 5623 |
| H | 0.041530  | 64.95 | 76.61  | 39.48 | 3H37 | NEX | 5623 |
| H | 0.051370  | 59.16 | 73.92  | 40.96 | 1H38 | NEX | 5623 |
| H | 0.051370  | 59.54 | 75.10  | 42.03 | 2H38 | NEX | 5623 |
| H | 0.051370  | 58.91 | 75.49  | 40.58 | 3H38 | NEX | 5623 |
| H | 0.044030  | 59.40 | 79.39  | 41.09 | 1H39 | NEX | 5623 |
| H | 0.044030  | 58.54 | 79.76  | 42.42 | 2H39 | NEX | 5623 |
| H | 0.044030  | 59.67 | 80.80  | 41.87 | 3H39 | NEX | 5623 |
| H | 0.046700  | 63.78 | 77.92  | 45.97 | 1H40 | NEX | 5623 |
| H | 0.046700  | 64.73 | 78.62  | 47.10 | 2H40 | NEX | 5623 |
| H | 0.046700  | 63.82 | 77.33  | 47.50 | 3H40 | NEX | 5623 |
| H | 0.400000  | 62.24 | 72.16  | 37.93 | H6   | NEX | 5623 |
| C | 0.004200  | 68.27 | 81.42  | 59.14 | C7   | NEX | 5623 |
| O | -0.870600 | 62.35 | 100.48 | 15.26 | O1   | LHG | 5630 |
| C | 0.291800  | 63.27 | 99.71  | 16.02 | C1   | LHG | 5630 |
| C | 0.191200  | 63.53 | 100.39 | 17.36 | C2   | LHG | 5630 |
| O | -0.876600 | 64.79 | 101.02 | 17.33 | O2   | LHG | 5630 |
| C | 0.281800  | 63.48 | 99.38  | 18.50 | C3   | LHG | 5630 |
| O | -0.396400 | 62.26 | 98.70  | 18.43 | O3   | LHG | 5630 |
| P | 0.657000  | 61.88 | 97.93  | 19.78 | P    | LHG | 5630 |
| O | -0.552600 | 61.74 | 98.91  | 20.90 | O5   | LHG | 5630 |
| O | -0.402400 | 60.52 | 97.11  | 19.53 | O6   | LHG | 5630 |
| C | 0.337800  | 59.87 | 96.81  | 20.71 | C4   | LHG | 5630 |
| C | 0.244200  | 58.91 | 95.66  | 20.42 | C5   | LHG | 5630 |
| C | 0.257800  | 58.87 | 94.65  | 21.56 | C6   | LHG | 5630 |
| O | -0.593800 | 57.55 | 96.15  | 20.25 | O7   | LHG | 5630 |
| C | 0.965200  | 56.76 | 95.52  | 19.19 | C7   | LHG | 5630 |
| O | -0.740000 | 57.08 | 94.46  | 18.66 | O9   | LHG | 5630 |
| C | -0.099800 | 55.48 | 96.19  | 18.69 | C8   | LHG | 5630 |
| C | -0.006800 | 54.24 | 95.55  | 19.29 | C9   | LHG | 5630 |
| C | 0.002200  | 53.01 | 95.74  | 18.40 | C10  | LHG | 5630 |
| O | -0.593800 | 59.63 | 94.88  | 22.78 | O8   | LHG | 5630 |
| C | 0.961200  | 58.87 | 95.08  | 23.99 | C23  | LHG | 5630 |
| O | -0.678000 | 58.94 | 96.13  | 24.63 | O10  | LHG | 5630 |
| C | -0.137800 | 57.98 | 94.03  | 24.65 | C24  | LHG | 5630 |
| C | 0.000200  | 52.21 | 94.44  | 18.27 | C11  | LHG | 5630 |
| C | -0.003800 | 50.86 | 94.54  | 18.97 | C12  | LHG | 5630 |
| C | -0.001800 | 49.89 | 93.47  | 18.50 | C13  | LHG | 5630 |
| C | -0.000800 | 48.72 | 93.34  | 19.47 | C14  | LHG | 5630 |
| C | -0.000800 | 47.53 | 92.65  | 18.83 | C15  | LHG | 5630 |
| C | 0.001200  | 46.96 | 91.55  | 19.73 | C16  | LHG | 5630 |
| C | 0.000200  | 45.54 | 91.85  | 20.22 | C17  | LHG | 5630 |

|   |           |       |        |       |      |     |      |
|---|-----------|-------|--------|-------|------|-----|------|
| C | -0.000800 | 44.49 | 91.10  | 19.40 | C18  | LHG | 5630 |
| C | -0.000800 | 43.32 | 90.65  | 20.26 | C19  | LHG | 5630 |
| C | 0.000200  | 42.45 | 89.65  | 19.51 | C20  | LHG | 5630 |
| C | -0.000800 | 41.55 | 88.83  | 20.44 | C21  | LHG | 5630 |
| C | 0.025800  | 41.77 | 87.33  | 20.28 | C22  | LHG | 5630 |
| C | 0.000200  | 54.79 | 92.92  | 22.46 | C27  | LHG | 5630 |
| C | -0.002800 | 55.02 | 92.56  | 21.00 | C28  | LHG | 5630 |
| C | 0.001200  | 55.23 | 91.08  | 20.80 | C29  | LHG | 5630 |
| C | -0.002800 | 54.53 | 90.57  | 19.56 | C30  | LHG | 5630 |
| C | -0.004800 | 55.41 | 90.69  | 18.32 | C31  | LHG | 5630 |
| C | 0.002200  | 54.65 | 91.40  | 17.21 | C32  | LHG | 5630 |
| C | -0.008800 | 55.55 | 92.35  | 16.44 | C33  | LHG | 5630 |
| C | 0.002200  | 54.95 | 92.71  | 15.10 | C34  | LHG | 5630 |
| C | 0.000200  | 55.45 | 91.79  | 14.00 | C35  | LHG | 5630 |
| C | -0.000800 | 56.53 | 92.45  | 13.16 | C36  | LHG | 5630 |
| C | -0.001800 | 57.67 | 91.48  | 12.89 | C37  | LHG | 5630 |
| C | 0.025800  | 58.97 | 92.22  | 12.67 | C38  | LHG | 5630 |
| H | 0.613000  | 62.19 | 100.03 | 14.38 | H1   | LHG | 5630 |
| H | 0.021400  | 62.88 | 98.80  | 16.14 | H11  | LHG | 5630 |
| H | 0.021400  | 64.12 | 99.64  | 15.49 | H12  | LHG | 5630 |
| H | 0.019400  | 62.86 | 101.11 | 17.51 | H2   | LHG | 5630 |
| H | 0.611000  | 64.96 | 101.46 | 18.21 | H4   | LHG | 5630 |
| H | 0.029900  | 64.22 | 98.71  | 18.43 | H31  | LHG | 5630 |
| H | 0.029900  | 63.54 | 99.84  | 19.39 | H32  | LHG | 5630 |
| H | 0.039900  | 60.03 | 96.06  | 21.36 | H41  | LHG | 5630 |
| H | 0.039900  | 58.93 | 97.13  | 20.79 | H42  | LHG | 5630 |
| H | 0.060400  | 59.21 | 95.24  | 19.57 | H5   | LHG | 5630 |
| H | 0.023900  | 57.92 | 94.56  | 21.85 | H61  | LHG | 5630 |
| H | 0.023900  | 59.20 | 93.78  | 21.21 | H62  | LHG | 5630 |
| H | 0.044400  | 55.49 | 97.16  | 18.95 | H81  | LHG | 5630 |
| H | 0.044400  | 55.43 | 96.11  | 17.70 | H82  | LHG | 5630 |
| H | 0.020400  | 54.41 | 94.57  | 19.41 | H91  | LHG | 5630 |
| H | 0.020400  | 54.06 | 95.96  | 20.18 | H92  | LHG | 5630 |
| H | 0.002400  | 52.43 | 96.44  | 18.81 | 1H10 | LHG | 5630 |
| H | 0.002400  | 53.31 | 96.03  | 17.50 | 2H10 | LHG | 5630 |
| H | 0.036400  | 58.38 | 93.13  | 24.51 | 1H24 | LHG | 5630 |
| H | 0.036400  | 57.92 | 94.22  | 25.63 | 2H24 | LHG | 5630 |
| H | 0.004400  | 52.73 | 93.69  | 18.68 | 1H11 | LHG | 5630 |
| H | 0.004400  | 52.06 | 94.25  | 17.30 | 2H11 | LHG | 5630 |
| H | 0.001400  | 51.00 | 94.44  | 19.95 | 1H12 | LHG | 5630 |
| H | 0.001400  | 50.47 | 95.44  | 18.78 | 2H12 | LHG | 5630 |
| H | 0.001400  | 49.54 | 93.71  | 17.60 | 1H13 | LHG | 5630 |
| H | 0.001400  | 50.37 | 92.59  | 18.45 | 2H13 | LHG | 5630 |
| H | -0.000100 | 49.01 | 92.81  | 20.27 | 1H14 | LHG | 5630 |
| H | -0.000100 | 48.44 | 94.26  | 19.76 | 2H14 | LHG | 5630 |
| H | 0.001400  | 46.81 | 93.33  | 18.67 | 1H15 | LHG | 5630 |

|   |           |       |       |       |      |     |      |
|---|-----------|-------|-------|-------|------|-----|------|
| H | 0.001400  | 47.81 | 92.25 | 17.96 | 2H15 | LHG | 5630 |
| H | -0.000600 | 46.95 | 90.69 | 19.22 | 1H16 | LHG | 5630 |
| H | -0.000600 | 47.56 | 91.45 | 20.53 | 2H16 | LHG | 5630 |
| H | 0.000400  | 45.46 | 91.58 | 21.17 | 1H17 | LHG | 5630 |
| H | 0.000400  | 45.37 | 92.83 | 20.13 | 2H17 | LHG | 5630 |
| H | -0.000100 | 44.15 | 91.71 | 18.68 | 1H18 | LHG | 5630 |
| H | -0.000100 | 44.91 | 90.30 | 18.99 | 2H18 | LHG | 5630 |
| H | 0.000400  | 43.67 | 90.23 | 21.10 | 1H19 | LHG | 5630 |
| H | 0.000400  | 42.76 | 91.45 | 20.50 | 2H19 | LHG | 5630 |
| H | -0.000600 | 41.88 | 90.14 | 18.86 | 1H20 | LHG | 5630 |
| H | -0.000600 | 43.05 | 89.02 | 19.01 | 2H20 | LHG | 5630 |
| H | -0.001100 | 41.74 | 89.09 | 21.38 | 1H21 | LHG | 5630 |
| H | -0.001100 | 40.59 | 89.04 | 20.22 | 2H21 | LHG | 5630 |
| H | -0.006900 | 41.16 | 86.84 | 20.90 | 1H22 | LHG | 5630 |
| H | -0.006900 | 41.57 | 87.06 | 19.34 | 2H22 | LHG | 5630 |
| H | -0.006900 | 42.72 | 87.11 | 20.50 | 3H22 | LHG | 5630 |
| H | 0.003900  | 54.26 | 92.19 | 22.89 | 1H27 | LHG | 5630 |
| H | 0.003900  | 54.29 | 93.78 | 22.51 | 2H27 | LHG | 5630 |
| H | 0.001400  | 54.22 | 92.85 | 20.47 | 1H28 | LHG | 5630 |
| H | 0.001400  | 55.83 | 93.05 | 20.67 | 2H28 | LHG | 5630 |
| H | -0.000100 | 56.22 | 90.90 | 20.72 | 1H29 | LHG | 5630 |
| H | -0.000100 | 54.88 | 90.59 | 21.60 | 2H29 | LHG | 5630 |
| H | 0.000400  | 54.29 | 89.61 | 19.69 | 1H30 | LHG | 5630 |
| H | 0.000400  | 53.70 | 91.11 | 19.42 | 2H30 | LHG | 5630 |
| H | 0.005400  | 56.23 | 91.21 | 18.55 | 1H31 | LHG | 5630 |
| H | 0.005400  | 55.67 | 89.78 | 18.02 | 2H31 | LHG | 5630 |
| H | -0.004100 | 54.28 | 90.71 | 16.59 | 1H32 | LHG | 5630 |
| H | -0.004100 | 53.90 | 91.92 | 17.62 | 2H32 | LHG | 5630 |
| H | 0.011400  | 55.69 | 93.18 | 16.97 | 1H33 | LHG | 5630 |
| H | 0.011400  | 56.44 | 91.90 | 16.29 | 2H33 | LHG | 5630 |
| H | -0.002100 | 53.95 | 92.64 | 15.16 | 1H34 | LHG | 5630 |
| H | -0.002100 | 55.20 | 93.65 | 14.87 | 2H34 | LHG | 5630 |
| H | -0.001600 | 55.81 | 90.96 | 14.41 | 1H35 | LHG | 5630 |
| H | -0.001600 | 54.68 | 91.56 | 13.40 | 2H35 | LHG | 5630 |
| H | 0.001900  | 56.14 | 92.75 | 12.29 | 1H36 | LHG | 5630 |
| H | 0.001900  | 56.89 | 93.25 | 13.65 | 2H36 | LHG | 5630 |
| H | -0.002100 | 57.77 | 90.87 | 13.67 | 1H37 | LHG | 5630 |
| H | -0.002100 | 57.46 | 90.94 | 12.07 | 2H37 | LHG | 5630 |
| H | -0.007600 | 59.71 | 91.57 | 12.49 | 1H38 | LHG | 5630 |
| H | -0.007600 | 58.88 | 92.84 | 11.88 | 2H38 | LHG | 5630 |
| H | -0.007600 | 59.19 | 92.76 | 13.49 | 3H38 | LHG | 5630 |
| O | -0.738800 | 62.88 | 96.89 | 20.15 | O4   | LHG | 5630 |
| H | 0.689000  | 63.76 | 97.33 | 20.32 | H6   | LHG | 5630 |
| C | 0.000200  | 56.14 | 93.07 | 23.19 | C26  | LHG | 5630 |
| H | 0.004900  | 56.86 | 93.09 | 22.50 | 1H26 | LHG | 5630 |
| H | 0.004900  | 56.26 | 92.27 | 23.78 | 2H26 | LHG | 5630 |

|    |           |       |        |       |      |     |      |
|----|-----------|-------|--------|-------|------|-----|------|
| C  | 0.002200  | 56.55 | 94.07  | 24.03 | C25  | LHG | 5630 |
| H  | 0.014900  | 55.87 | 94.07  | 24.76 | 1H25 | LHG | 5630 |
| H  | 0.014900  | 56.45 | 94.90  | 23.48 | 2H25 | LHG | 5630 |
| Mg | 1.169200  | 53.81 | 100.31 | 18.62 | MG   | CHL | 601  |
| C  | -0.004739 | 49.45 | 99.76  | 21.53 | CAA  | CHL | 601  |
| C  | -0.112834 | 53.05 | 102.64 | 13.46 | CAB  | CHL | 601  |
| C  | 0.160477  | 59.54 | 101.01 | 18.51 | CAC  | CHL | 601  |
| C  | 0.627291  | 53.68 | 97.75  | 23.26 | CAD  | CHL | 601  |
| N  | -0.489633 | 51.83 | 99.60  | 19.16 | NA   | CHL | 601  |
| C  | -0.219908 | 47.99 | 100.10 | 21.83 | CBA  | CHL | 601  |
| C  | -0.367704 | 54.20 | 103.13 | 12.91 | CBB  | CHL | 601  |
| C  | -0.168957 | 59.87 | 102.20 | 19.38 | CBC  | CHL | 601  |
| C  | -0.692237 | 52.24 | 97.84  | 22.66 | CBD  | CHL | 601  |
| N  | -0.549527 | 53.09 | 101.08 | 16.88 | NB   | CHL | 601  |
| O  | -0.531678 | 53.87 | 97.29  | 24.38 | OBD  | CHL | 601  |
| C  | 0.826782  | 46.97 | 99.01  | 21.58 | CGA  | CHL | 601  |
| C  | 0.975656  | 51.63 | 96.42  | 22.52 | CGD  | CHL | 601  |
| N  | -0.548096 | 55.75 | 100.78 | 18.08 | NC   | CHL | 601  |
| N  | -0.486413 | 54.56 | 99.40  | 20.26 | ND   | CHL | 601  |
| C  | 0.040004  | 49.30 | 95.59  | 22.60 | CED  | CHL | 601  |
| C  | 0.087495  | 52.44 | 98.53  | 21.31 | CHA  | CHL | 601  |
| C  | -0.519448 | 50.70 | 100.45 | 17.14 | CHB  | CHL | 601  |
| C  | -0.373104 | 55.24 | 101.72 | 15.86 | CHC  | CHL | 601  |
| C  | -0.358246 | 56.94 | 99.86  | 20.03 | CHD  | CHL | 601  |
| C  | -0.410730 | 48.95 | 97.92  | 18.34 | CMA  | CHL | 601  |
| C  | -0.236326 | 50.32 | 101.82 | 14.42 | CMB  | CHL | 601  |
| C  | 0.440869  | 58.28 | 102.14 | 15.77 | CMC  | CHL | 601  |
| C  | -0.266591 | 57.14 | 98.41  | 22.89 | CMD  | CHL | 601  |
| O  | -0.537107 | 57.99 | 102.61 | 14.67 | OMC  | CHL | 601  |
| C  | 0.018007  | 51.49 | 98.94  | 20.33 | C1A  | CHL | 601  |
| C  | 0.290707  | 51.77 | 101.04 | 16.46 | C1B  | CHL | 601  |
| C  | 0.332773  | 56.14 | 101.35 | 16.89 | C1C  | CHL | 601  |
| C  | 0.191076  | 55.85 | 99.32  | 20.73 | C1D  | CHL | 601  |
| O  | -0.589721 | 46.93 | 97.92  | 22.16 | O1A  | CHL | 601  |
| O  | -0.623224 | 52.19 | 95.49  | 21.94 | O1D  | CHL | 601  |
| C  | 0.037093  | 49.98 | 98.82  | 20.43 | C2A  | CHL | 601  |
| C  | 0.078577  | 51.68 | 101.64 | 15.15 | C2B  | CHL | 601  |
| C  | -0.147964 | 57.59 | 101.55 | 16.91 | C2C  | CHL | 601  |
| C  | 0.084438  | 55.89 | 98.63  | 22.01 | C2D  | CHL | 601  |
| O  | -0.485288 | 46.01 | 99.33  | 20.58 | O2A  | CHL | 601  |
| O  | -0.399841 | 50.36 | 96.33  | 23.10 | O2D  | CHL | 601  |
| C  | 0.179052  | 49.50 | 99.17  | 19.04 | C3A  | CHL | 601  |
| C  | -0.054715 | 52.95 | 101.99 | 14.76 | C3B  | CHL | 601  |
| C  | -0.234405 | 58.04 | 101.05 | 18.08 | C3C  | CHL | 601  |
| C  | -0.158062 | 54.59 | 98.30  | 22.28 | C3D  | CHL | 601  |
| C  | 0.345332  | 50.71 | 99.78  | 18.37 | C4A  | CHL | 601  |



|   |           |       |        |       |      |     |     |
|---|-----------|-------|--------|-------|------|-----|-----|
| C | 0.233194  | 53.85 | 101.60 | 15.85 | C4B  | CHL | 601 |
| C | 0.342833  | 56.90 | 100.53 | 18.80 | C4C  | CHL | 601 |
| C | 0.130108  | 53.80 | 98.77  | 21.19 | C4D  | CHL | 601 |
| C | 0.345381  | 44.75 | 98.59  | 20.59 | C1   | CHL | 601 |
| C | -0.477083 | 44.54 | 98.09  | 19.25 | C2   | CHL | 601 |
| C | 0.260847  | 44.97 | 96.88  | 18.73 | C3   | CHL | 601 |
| C | -0.269607 | 45.77 | 95.82  | 19.53 | C4   | CHL | 601 |
| C | -0.336279 | 44.76 | 96.48  | 17.27 | C5   | CHL | 601 |
| C | 0.119257  | 43.46 | 95.83  | 16.86 | C6   | CHL | 601 |
| C | -0.175039 | 43.75 | 94.82  | 15.75 | C7   | CHL | 601 |
| C | 0.331362  | 42.55 | 94.14  | 15.10 | C8   | CHL | 601 |
| C | -0.313835 | 42.83 | 93.65  | 13.69 | C9   | CHL | 601 |
| C | -0.284648 | 41.55 | 93.41  | 16.02 | C10  | CHL | 601 |
| C | 0.041634  | 40.94 | 92.08  | 15.67 | C11  | CHL | 601 |
| C | -0.154439 | 39.98 | 91.76  | 16.81 | C12  | CHL | 601 |
| C | 0.196709  | 39.33 | 90.39  | 16.96 | C13  | CHL | 601 |
| C | -0.232704 | 39.06 | 89.60  | 15.70 | C14  | CHL | 601 |
| C | -0.201414 | 38.12 | 90.45  | 17.89 | C15  | CHL | 601 |
| C | 0.209589  | 38.00 | 89.44  | 19.00 | C16  | CHL | 601 |
| C | -0.269983 | 36.64 | 88.81  | 19.27 | C17  | CHL | 601 |
| C | 0.432452  | 36.26 | 88.39  | 20.70 | C18  | CHL | 601 |
| C | -0.315373 | 35.00 | 87.55  | 20.73 | C19  | CHL | 601 |
| C | -0.315373 | 37.29 | 87.58  | 21.51 | C20  | CHL | 601 |
| H | 0.003832  | 49.88 | 100.64 | 21.36 | 1HAA | CHL | 601 |
| H | 0.003832  | 49.79 | 99.38  | 22.39 | 2HAA | CHL | 601 |
| H | 0.140703  | 52.21 | 102.73 | 12.92 | HAB  | CHL | 601 |
| H | -0.000428 | 59.72 | 100.18 | 19.02 | 1HAC | CHL | 601 |
| H | -0.000428 | 60.12 | 101.05 | 17.70 | 2HAC | CHL | 601 |
| H | 0.057072  | 47.93 | 100.35 | 22.80 | 1HBA | CHL | 601 |
| H | 0.057072  | 47.74 | 100.88 | 21.26 | 2HBA | CHL | 601 |
| H | 0.167066  | 55.06 | 103.05 | 13.41 | 1HBB | CHL | 601 |
| H | 0.167066  | 54.18 | 103.56 | 12.01 | 2HBB | CHL | 601 |
| H | 0.046995  | 60.84 | 102.15 | 19.65 | 1HBC | CHL | 601 |
| H | 0.046995  | 59.70 | 103.04 | 18.88 | 2HBC | CHL | 601 |
| H | 0.046995  | 59.30 | 102.18 | 20.21 | 3HBC | CHL | 601 |
| H | 0.218234  | 51.60 | 98.35  | 23.23 | HBD  | CHL | 601 |
| H | 0.063428  | 48.51 | 95.69  | 23.20 | 1HED | CHL | 601 |
| H | 0.063428  | 49.07 | 95.92  | 21.69 | 2HED | CHL | 601 |
| H | 0.063428  | 49.56 | 94.62  | 22.55 | 3HED | CHL | 601 |
| H | 0.175319  | 49.81 | 100.50 | 16.69 | HHB  | CHL | 601 |
| H | 0.209400  | 55.66 | 102.12 | 15.04 | HHC  | CHL | 601 |
| H | 0.200579  | 57.84 | 99.75  | 20.45 | HHD  | CHL | 601 |
| H | 0.104969  | 48.63 | 98.17  | 17.42 | 1HMA | CHL | 601 |
| H | 0.104969  | 49.67 | 97.24  | 18.27 | 2HMA | CHL | 601 |
| H | 0.104969  | 48.18 | 97.56  | 18.87 | 3HMA | CHL | 601 |
| H | 0.077125  | 50.48 | 102.25 | 13.53 | 1HMB | CHL | 601 |

|   |           |       |        |       |      |     |     |
|---|-----------|-------|--------|-------|------|-----|-----|
| H | 0.077125  | 49.90 | 100.93 | 14.28 | 2HMB | CHL | 601 |
| H | 0.077125  | 49.72 | 102.40 | 14.97 | 3HMB | CHL | 601 |
| H | 0.021209  | 59.27 | 102.16 | 15.93 | HMC  | CHL | 601 |
| H | 0.090203  | 56.88 | 97.91  | 23.71 | 1HMD | CHL | 601 |
| H | 0.090203  | 57.82 | 97.88  | 22.37 | 2HMD | CHL | 601 |
| H | 0.090203  | 57.53 | 99.29  | 23.14 | 3HMD | CHL | 601 |
| H | 0.205820  | 44.02 | 98.68  | 18.64 | H2   | CHL | 601 |
| H | -0.019695 | 41.89 | 94.86  | 14.89 | H8   | CHL | 601 |
| H | 0.016242  | 44.00 | 99.18  | 20.85 | H11  | CHL | 601 |
| H | 0.016242  | 44.81 | 97.82  | 21.23 | H12  | CHL | 601 |
| H | -0.010572 | 40.05 | 89.84  | 17.39 | H13  | CHL | 601 |
| H | -0.061651 | 36.17 | 89.28  | 21.14 | H18  | CHL | 601 |
| H | 0.059830  | 49.66 | 97.90  | 20.68 | H2A  | CHL | 601 |
| H | 0.085694  | 45.96 | 95.03  | 18.94 | H41  | CHL | 601 |
| H | 0.085694  | 46.63 | 96.22  | 19.85 | H42  | CHL | 601 |
| H | 0.085694  | 45.23 | 95.52  | 20.32 | H43  | CHL | 601 |
| H | 0.032055  | 48.74 | 99.82  | 19.03 | H3A  | CHL | 601 |
| H | 0.096900  | 45.49 | 95.84  | 17.02 | H51  | CHL | 601 |
| H | 0.096900  | 44.85 | 97.31  | 16.72 | H52  | CHL | 601 |
| H | -0.002304 | 42.82 | 96.53  | 16.53 | H61  | CHL | 601 |
| H | -0.002304 | 43.06 | 95.36  | 17.65 | H62  | CHL | 601 |
| H | 0.027697  | 44.32 | 94.11  | 16.14 | H71  | CHL | 601 |
| H | 0.027697  | 44.25 | 95.30  | 15.03 | H72  | CHL | 601 |
| H | 0.069285  | 42.01 | 93.21  | 13.32 | H91  | CHL | 601 |
| H | 0.069285  | 43.08 | 94.42  | 13.11 | H92  | CHL | 601 |
| H | 0.069285  | 43.58 | 92.98  | 13.71 | H93  | CHL | 601 |
| H | 0.073653  | 40.79 | 94.04  | 16.15 | 1H10 | CHL | 601 |
| H | 0.073653  | 42.03 | 93.27  | 16.89 | 2H10 | CHL | 601 |
| H | 0.015417  | 41.64 | 91.37  | 15.60 | 1H11 | CHL | 601 |
| H | 0.015417  | 40.44 | 92.14  | 14.80 | 2H11 | CHL | 601 |
| H | 0.036623  | 39.23 | 92.42  | 16.74 | 1H12 | CHL | 601 |
| H | 0.036623  | 40.49 | 91.93  | 17.65 | 2H12 | CHL | 601 |
| H | 0.048461  | 38.64 | 88.73  | 15.93 | 1H14 | CHL | 601 |
| H | 0.048461  | 38.45 | 90.12  | 15.10 | 2H14 | CHL | 601 |
| H | 0.048461  | 39.92 | 89.43  | 15.22 | 3H14 | CHL | 601 |
| H | 0.037455  | 37.31 | 90.36  | 17.32 | 1H15 | CHL | 601 |
| H | 0.037455  | 38.13 | 91.36  | 18.31 | 2H15 | CHL | 601 |
| H | -0.021542 | 38.28 | 89.90  | 19.84 | 1H16 | CHL | 601 |
| H | -0.021542 | 38.64 | 88.70  | 18.79 | 2H16 | CHL | 601 |
| H | 0.043717  | 36.59 | 88.00  | 18.69 | 1H17 | CHL | 601 |
| H | 0.043717  | 35.96 | 89.48  | 18.97 | 2H17 | CHL | 601 |
| H | 0.058595  | 34.79 | 87.29  | 21.67 | 1H19 | CHL | 601 |
| H | 0.058595  | 34.24 | 88.08  | 20.35 | 2H19 | CHL | 601 |
| H | 0.058595  | 35.13 | 86.72  | 20.18 | 3H19 | CHL | 601 |
| H | 0.058595  | 36.91 | 87.38  | 22.42 | 1H20 | CHL | 601 |
| H | 0.058595  | 37.50 | 86.73  | 21.04 | 2H20 | CHL | 601 |

|    |           |       |        |       |      |     |     |
|----|-----------|-------|--------|-------|------|-----|-----|
| H  | 0.058595  | 38.13 | 88.12  | 21.61 | 3H2O | CHL | 601 |
| Mg | 1.440381  | 53.20 | 98.09  | 31.22 | MG   | CLA | 602 |
| C  | 0.296003  | 53.93 | 101.47 | 30.70 | CHA  | CLA | 602 |
| C  | -0.860850 | 52.34 | 98.84  | 34.49 | CHB  | CLA | 602 |
| C  | -0.490961 | 52.16 | 94.86  | 31.61 | CHC  | CLA | 602 |
| C  | -0.646114 | 53.94 | 97.50  | 27.90 | CHD  | CLA | 602 |
| N  | -0.718243 | 53.16 | 99.89  | 32.43 | NA   | CLA | 602 |
| C  | 0.064196  | 53.45 | 101.18 | 31.99 | C1A  | CLA | 602 |
| C  | -0.224146 | 53.21 | 102.17 | 33.12 | C2A  | CLA | 602 |
| C  | 0.397216  | 53.12 | 101.29 | 34.34 | C3A  | CLA | 602 |
| C  | 0.699142  | 52.83 | 99.91  | 33.77 | C4A  | CLA | 602 |
| C  | -0.476446 | 54.44 | 101.35 | 35.15 | CMA  | CLA | 602 |
| C  | -0.257131 | 52.02 | 103.10 | 32.91 | CAA  | CLA | 602 |
| C  | -0.017336 | 50.61 | 102.62 | 32.56 | CBA  | CLA | 602 |
| C  | 0.557726  | 49.81 | 102.01 | 33.72 | CGA  | CLA | 602 |
| O  | -0.479966 | 49.65 | 102.61 | 34.79 | O1A  | CLA | 602 |
| O  | -0.471399 | 49.27 | 100.70 | 33.57 | O2A  | CLA | 602 |
| N  | -0.869051 | 52.32 | 97.06  | 32.76 | NB   | CLA | 602 |
| C  | 0.656418  | 52.09 | 97.54  | 34.03 | C1B  | CLA | 602 |
| C  | 0.049634  | 51.54 | 96.47  | 34.84 | C2B  | CLA | 602 |
| C  | -0.300216 | 51.51 | 95.34  | 34.07 | C3B  | CLA | 602 |
| C  | 0.570735  | 52.01 | 95.71  | 32.74 | C4B  | CLA | 602 |
| C  | -0.351576 | 51.06 | 96.67  | 36.31 | CMB  | CLA | 602 |
| C  | 0.105971  | 50.92 | 94.18  | 34.72 | CAB  | CLA | 602 |
| C  | -0.510597 | 51.01 | 92.91  | 34.27 | CBB  | CLA | 602 |
| N  | -0.832036 | 53.08 | 96.47  | 29.96 | NC   | CLA | 602 |
| C  | 0.418922  | 52.64 | 95.21  | 30.32 | C1C  | CLA | 602 |
| C  | 0.149989  | 52.76 | 94.32  | 29.18 | C2C  | CLA | 602 |
| C  | -0.511810 | 53.23 | 95.07  | 28.13 | C3C  | CLA | 602 |
| C  | 0.637582  | 53.45 | 96.41  | 28.63 | C4C  | CLA | 602 |
| C  | -0.398501 | 52.45 | 92.81  | 29.04 | CMC  | CLA | 602 |
| C  | 0.305775  | 53.50 | 94.64  | 26.67 | CAC  | CLA | 602 |
| C  | -0.189740 | 52.22 | 94.66  | 25.84 | CBC  | CLA | 602 |
| N  | -0.472588 | 53.93 | 99.16  | 29.68 | ND   | CLA | 602 |
| C  | 0.322404  | 54.17 | 98.80  | 28.38 | C1D  | CLA | 602 |
| C  | 0.093768  | 54.66 | 99.94  | 27.60 | C2D  | CLA | 602 |
| C  | -0.274124 | 54.63 | 100.99 | 28.47 | C3D  | CLA | 602 |
| C  | -0.094145 | 54.12 | 100.51 | 29.72 | C4D  | CLA | 602 |
| C  | -0.334352 | 55.10 | 99.94  | 26.13 | CMD  | CLA | 602 |
| C  | 0.701706  | 54.86 | 102.41 | 28.64 | CAD  | CLA | 602 |
| O  | -0.635898 | 55.27 | 103.27 | 27.86 | OBD  | CLA | 602 |
| C  | -0.624694 | 54.46 | 102.78 | 30.11 | CBD  | CLA | 602 |
| C  | 0.657412  | 55.72 | 103.32 | 30.88 | CGD  | CLA | 602 |
| O  | -0.483436 | 55.94 | 104.53 | 30.93 | O1D  | CLA | 602 |
| O  | -0.390338 | 56.58 | 102.34 | 31.49 | O2D  | CLA | 602 |
| C  | -0.000618 | 57.57 | 102.70 | 32.42 | CED  | CLA | 602 |

|   |           |       |        |       |      |     |     |
|---|-----------|-------|--------|-------|------|-----|-----|
| C | 0.406198  | 48.98 | 99.96  | 34.80 | C1   | CLA | 602 |
| C | -0.221030 | 48.48 | 98.70  | 34.42 | C2   | CLA | 602 |
| C | 0.008522  | 47.53 | 97.84  | 34.93 | C3   | CLA | 602 |
| C | -0.450819 | 46.70 | 98.12  | 36.21 | C4   | CLA | 602 |
| C | 0.090695  | 47.29 | 96.62  | 34.03 | C5   | CLA | 602 |
| C | 0.130068  | 46.16 | 95.65  | 34.24 | C6   | CLA | 602 |
| C | -0.291517 | 44.90 | 95.97  | 33.49 | C7   | CLA | 602 |
| C | 0.279668  | 44.30 | 94.65  | 33.03 | C8   | CLA | 602 |
| C | -0.400727 | 43.29 | 93.89  | 33.88 | C9   | CLA | 602 |
| C | -0.055499 | 43.79 | 94.67  | 31.63 | C10  | CLA | 602 |
| C | 0.178256  | 44.79 | 93.89  | 30.84 | C11  | CLA | 602 |
| C | -0.170621 | 44.03 | 93.78  | 29.57 | C12  | CLA | 602 |
| C | 0.384011  | 45.03 | 93.79  | 28.47 | C13  | CLA | 602 |
| C | -0.383632 | 45.00 | 95.14  | 27.74 | C14  | CLA | 602 |
| C | -0.181140 | 44.89 | 92.47  | 27.73 | C15  | CLA | 602 |
| C | 0.036961  | 45.52 | 92.34  | 26.37 | C16  | CLA | 602 |
| C | -0.154197 | 46.98 | 92.00  | 26.37 | C17  | CLA | 602 |
| C | 0.445466  | 47.41 | 91.35  | 25.07 | C18  | CLA | 602 |
| C | -0.266674 | 47.68 | 92.31  | 23.90 | C19  | CLA | 602 |
| C | -0.556965 | 48.66 | 90.62  | 25.51 | C20  | CLA | 602 |
| H | 0.241453  | 52.13 | 99.01  | 35.45 | HHB  | CLA | 602 |
| H | 0.201825  | 51.89 | 93.91  | 31.74 | HHC  | CLA | 602 |
| H | 0.295085  | 54.16 | 97.33  | 26.94 | HHD  | CLA | 602 |
| H | 0.137917  | 53.96 | 102.83 | 33.21 | H2A  | CLA | 602 |
| H | -0.061345 | 52.41 | 101.58 | 34.98 | H3A  | CLA | 602 |
| H | 0.100686  | 54.36 | 100.76 | 35.95 | 1HMA | CLA | 602 |
| H | 0.170683  | 55.19 | 101.03 | 34.58 | 2HMA | CLA | 602 |
| H | 0.063146  | 54.61 | 102.29 | 35.44 | 3HMA | CLA | 602 |
| H | 0.117223  | 52.28 | 103.72 | 32.17 | 1HAA | CLA | 602 |
| H | 0.034370  | 51.92 | 103.61 | 33.76 | 2HAA | CLA | 602 |
| H | 0.068168  | 50.09 | 103.40 | 32.21 | 1HBA | CLA | 602 |
| H | 0.028034  | 50.68 | 101.92 | 31.85 | 2HBA | CLA | 602 |
| H | 0.110837  | 50.72 | 95.80  | 36.67 | 1HMB | CLA | 602 |
| H | 0.115373  | 51.82 | 96.99  | 36.87 | 2HMB | CLA | 602 |
| H | 0.136992  | 50.33 | 97.35  | 36.33 | 3HMB | CLA | 602 |
| H | 0.118306  | 50.41 | 94.33  | 35.56 | HAB  | CLA | 602 |
| H | 0.225187  | 51.51 | 92.71  | 33.42 | 1HBB | CLA | 602 |
| H | 0.182188  | 50.57 | 92.17  | 34.78 | 2HBB | CLA | 602 |
| H | 0.151763  | 52.65 | 92.50  | 28.11 | 1HMC | CLA | 602 |
| H | 0.105949  | 53.01 | 92.29  | 29.69 | 2HMC | CLA | 602 |
| H | 0.131387  | 51.48 | 92.65  | 29.25 | 3HMC | CLA | 602 |
| H | -0.062770 | 54.15 | 95.27  | 26.25 | 1HAC | CLA | 602 |
| H | -0.028620 | 53.87 | 93.72  | 26.65 | 2HAC | CLA | 602 |
| H | 0.049872  | 52.42 | 94.38  | 24.90 | 1HBC | CLA | 602 |
| H | 0.054496  | 51.55 | 94.03  | 26.24 | 2HBC | CLA | 602 |
| H | 0.066739  | 51.84 | 95.58  | 25.84 | 3HBC | CLA | 602 |

|   |           |       |        |       |      |     |     |
|---|-----------|-------|--------|-------|------|-----|-----|
| H | 0.084121  | 55.39 | 100.86 | 25.87 | 1HMD | CLA | 602 |
| H | 0.088401  | 55.87 | 99.30  | 26.01 | 2HMD | CLA | 602 |
| H | 0.120861  | 54.34 | 99.65  | 25.55 | 3HMD | CLA | 602 |
| H | 0.245531  | 53.76 | 103.49 | 30.17 | HBD  | CLA | 602 |
| H | 0.102687  | 58.05 | 101.88 | 32.72 | 1HED | CLA | 602 |
| H | 0.053431  | 58.22 | 103.33 | 31.99 | 2HED | CLA | 602 |
| H | 0.049996  | 57.15 | 103.15 | 33.21 | 3HED | CLA | 602 |
| H | 0.042307  | 48.30 | 100.44 | 35.34 | H11  | CLA | 602 |
| H | -0.059898 | 49.82 | 99.84  | 35.34 | H12  | CLA | 602 |
| H | 0.021758  | 48.92 | 98.34  | 33.59 | H2   | CLA | 602 |
| H | 0.160937  | 46.08 | 97.36  | 36.38 | H41  | CLA | 602 |
| H | 0.143119  | 47.33 | 98.22  | 36.99 | H42  | CLA | 602 |
| H | 0.155595  | 46.18 | 98.96  | 36.10 | H43  | CLA | 602 |
| H | -0.047222 | 48.13 | 96.08  | 34.08 | H51  | CLA | 602 |
| H | 0.024573  | 47.18 | 96.98  | 33.10 | H52  | CLA | 602 |
| H | -0.011469 | 45.94 | 95.63  | 35.21 | H61  | CLA | 602 |
| H | -0.058810 | 46.47 | 94.74  | 33.94 | H62  | CLA | 602 |
| H | 0.051788  | 45.11 | 96.55  | 32.70 | H71  | CLA | 602 |
| H | 0.076666  | 44.26 | 96.45  | 34.09 | H72  | CLA | 602 |
| H | -0.013635 | 45.15 | 94.12  | 33.13 | H8   | CLA | 602 |
| H | 0.107741  | 43.03 | 93.05  | 33.41 | H91  | CLA | 602 |
| H | 0.072814  | 43.70 | 93.66  | 34.77 | H92  | CLA | 602 |
| H | 0.091969  | 42.48 | 94.46  | 34.03 | H93  | CLA | 602 |
| H | -0.000402 | 43.73 | 95.61  | 31.29 | 1H10 | CLA | 602 |
| H | 0.013073  | 42.89 | 94.24  | 31.58 | 2H10 | CLA | 602 |
| H | -0.062624 | 44.98 | 92.99  | 31.24 | 1H11 | CLA | 602 |
| H | -0.044644 | 45.65 | 94.38  | 30.72 | 2H11 | CLA | 602 |
| H | 0.028763  | 43.40 | 94.55  | 29.47 | 1H12 | CLA | 602 |
| H | 0.029073  | 43.50 | 92.93  | 29.55 | 2H12 | CLA | 602 |
| H | -0.080740 | 45.99 | 93.79  | 28.75 | H13  | CLA | 602 |
| H | 0.086693  | 45.67 | 95.14  | 27.01 | 1H14 | CLA | 602 |
| H | 0.067667  | 44.09 | 95.28  | 27.36 | 2H14 | CLA | 602 |
| H | 0.086486  | 45.21 | 95.87  | 28.39 | 3H14 | CLA | 602 |
| H | 0.033992  | 43.92 | 92.29  | 27.62 | 1H15 | CLA | 602 |
| H | 0.036765  | 45.30 | 91.77  | 28.31 | 2H15 | CLA | 602 |
| H | -0.016467 | 45.40 | 93.21  | 25.89 | 1H16 | CLA | 602 |
| H | 0.008068  | 45.03 | 91.62  | 25.88 | 2H16 | CLA | 602 |
| H | 0.040028  | 47.17 | 91.37  | 27.12 | 1H17 | CLA | 602 |
| H | 0.025223  | 47.51 | 92.84  | 26.50 | 2H17 | CLA | 602 |
| H | -0.057629 | 46.68 | 90.78  | 24.69 | H18  | CLA | 602 |
| H | 0.067430  | 47.95 | 91.78  | 23.09 | 1H19 | CLA | 602 |
| H | 0.041552  | 46.84 | 92.82  | 23.69 | 2H19 | CLA | 602 |
| H | 0.027859  | 48.41 | 92.94  | 24.15 | 3H19 | CLA | 602 |
| H | 0.131969  | 49.06 | 90.13  | 24.73 | 1H20 | CLA | 602 |
| H | 0.112314  | 49.33 | 91.27  | 25.86 | 2H20 | CLA | 602 |
| H | 0.131652  | 48.43 | 89.96  | 26.23 | 3H20 | CLA | 602 |

|    |           |       |       |       |     |     |     |
|----|-----------|-------|-------|-------|-----|-----|-----|
| Mg | 0.743847  | 48.45 | 89.80 | 37.97 | MG  | CLA | 603 |
| C  | 0.063221  | 47.78 | 92.09 | 40.54 | CHA | CLA | 603 |
| C  | -0.408136 | 46.69 | 91.85 | 35.79 | CHB | CLA | 603 |
| C  | -0.106655 | 48.48 | 87.30 | 35.60 | CHC | CLA | 603 |
| C  | -0.345683 | 49.54 | 87.52 | 40.34 | CHD | CLA | 603 |
| N  | -0.228028 | 47.48 | 91.77 | 38.11 | NA  | CLA | 603 |
| C  | -0.223899 | 47.35 | 92.54 | 39.26 | C1A | CLA | 603 |
| C  | 0.399316  | 46.63 | 93.85 | 38.95 | C2A | CLA | 603 |
| C  | -0.103658 | 46.24 | 93.72 | 37.50 | C3A | CLA | 603 |
| C  | 0.121905  | 46.83 | 92.39 | 37.06 | C4A | CLA | 603 |
| C  | 0.002402  | 44.71 | 93.79 | 37.42 | CMA | CLA | 603 |
| C  | -0.203143 | 47.40 | 95.17 | 39.05 | CAA | CLA | 603 |
| C  | -0.160571 | 46.80 | 96.47 | 39.57 | CBA | CLA | 603 |
| C  | 0.575464  | 45.31 | 96.64 | 39.81 | CGA | CLA | 603 |
| O  | -0.480478 | 44.64 | 97.39 | 39.10 | O1A | CLA | 603 |
| O  | -0.409901 | 44.65 | 95.91 | 40.87 | O2A | CLA | 603 |
| N  | -0.434425 | 47.83 | 89.65 | 36.02 | NB  | CLA | 603 |
| C  | 0.266792  | 47.14 | 90.61 | 35.31 | C1B | CLA | 603 |
| C  | -0.010896 | 46.99 | 90.16 | 33.95 | C2B | CLA | 603 |
| C  | 0.007647  | 47.36 | 88.85 | 33.91 | C3B | CLA | 603 |
| C  | 0.096810  | 47.94 | 88.53 | 35.21 | C4B | CLA | 603 |
| C  | -0.304909 | 46.46 | 91.10 | 32.85 | CMB | CLA | 603 |
| C  | -0.087299 | 47.08 | 88.16 | 32.65 | CAB | CLA | 603 |
| C  | -0.438534 | 47.43 | 86.88 | 32.37 | CBB | CLA | 603 |
| N  | -0.334732 | 49.02 | 87.78 | 37.96 | NC  | CLA | 603 |
| C  | -0.085389 | 48.98 | 86.94 | 36.86 | C1C | CLA | 603 |
| C  | 0.284218  | 49.50 | 85.64 | 37.24 | C2C | CLA | 603 |
| C  | -0.402467 | 49.89 | 85.73 | 38.55 | C3C | CLA | 603 |
| C  | 0.323845  | 49.45 | 87.03 | 39.03 | C4C | CLA | 603 |
| C  | -0.443867 | 49.60 | 84.38 | 36.37 | CMC | CLA | 603 |
| C  | 0.308141  | 50.72 | 84.66 | 39.32 | CAC | CLA | 603 |
| C  | -0.272914 | 52.22 | 84.60 | 38.93 | CBC | CLA | 603 |
| N  | -0.378455 | 48.68 | 89.78 | 39.94 | ND  | CLA | 603 |
| C  | 0.045825  | 49.18 | 88.80 | 40.79 | C1D | CLA | 603 |
| C  | 0.302180  | 49.22 | 89.29 | 42.16 | C2D | CLA | 603 |
| C  | -0.416707 | 48.75 | 90.58 | 42.11 | C3D | CLA | 603 |
| C  | 0.174329  | 48.36 | 90.83 | 40.75 | C4D | CLA | 603 |
| C  | -0.404104 | 49.66 | 88.50 | 43.38 | CMD | CLA | 603 |
| C  | 0.734691  | 48.55 | 91.81 | 42.83 | CAD | CLA | 603 |
| O  | -0.499868 | 48.89 | 92.15 | 43.96 | OBD | CLA | 603 |
| C  | -0.643192 | 47.78 | 92.79 | 41.90 | CBD | CLA | 603 |
| C  | 0.750547  | 46.30 | 93.03 | 42.47 | CGD | CLA | 603 |
| O  | -0.476713 | 46.14 | 93.89 | 43.33 | O1D | CLA | 603 |
| O  | -0.310194 | 45.26 | 92.19 | 41.99 | O2D | CLA | 603 |
| C  | -0.119380 | 44.02 | 92.15 | 42.57 | CED | CLA | 603 |
| C  | 0.225015  | 43.26 | 96.24 | 41.14 | C1  | CLA | 603 |

|   |           |       |       |       |      |     |     |
|---|-----------|-------|-------|-------|------|-----|-----|
| C | -0.433741 | 42.39 | 95.31 | 40.35 | C2   | CLA | 603 |
| C | 0.235271  | 41.36 | 95.60 | 39.45 | C3   | CLA | 603 |
| C | -0.342309 | 40.89 | 97.02 | 39.08 | C4   | CLA | 603 |
| C | -0.298864 | 40.47 | 94.54 | 38.78 | C5   | CLA | 603 |
| C | 0.409166  | 40.95 | 93.79 | 37.55 | C6   | CLA | 603 |
| C | -0.425196 | 41.10 | 92.31 | 37.88 | C7   | CLA | 603 |
| C | 0.456929  | 40.17 | 91.42 | 37.07 | C8   | CLA | 603 |
| C | -0.482191 | 40.84 | 90.76 | 35.89 | C9   | CLA | 603 |
| C | -0.210603 | 39.22 | 90.48 | 37.82 | C10  | CLA | 603 |
| C | 0.343651  | 39.86 | 89.48 | 38.77 | C11  | CLA | 603 |
| C | -0.189752 | 39.00 | 88.23 | 38.67 | C12  | CLA | 603 |
| C | 0.234328  | 38.54 | 87.53 | 39.93 | C13  | CLA | 603 |
| C | -0.434898 | 37.37 | 88.30 | 40.54 | C14  | CLA | 603 |
| C | 0.100744  | 39.62 | 87.07 | 40.91 | C15  | CLA | 603 |
| C | -0.078463 | 40.57 | 85.94 | 40.53 | C16  | CLA | 603 |
| C | -0.027000 | 41.41 | 85.50 | 41.73 | C17  | CLA | 603 |
| C | 0.416339  | 41.39 | 84.08 | 42.30 | C18  | CLA | 603 |
| C | -0.456567 | 41.76 | 84.19 | 43.78 | C19  | CLA | 603 |
| C | -0.352546 | 40.16 | 83.18 | 42.07 | C20  | CLA | 603 |
| H | 0.184640  | 46.20 | 92.41 | 35.13 | HHB  | CLA | 603 |
| H | 0.140439  | 48.50 | 86.58 | 34.90 | HHC  | CLA | 603 |
| H | 0.201516  | 49.89 | 86.88 | 41.04 | HHD  | CLA | 603 |
| H | -0.043357 | 45.91 | 93.92 | 39.64 | H2A  | CLA | 603 |
| H | 0.065014  | 46.59 | 94.45 | 36.91 | H3A  | CLA | 603 |
| H | 0.005234  | 44.43 | 93.71 | 36.46 | 1HMA | CLA | 603 |
| H | 0.089112  | 44.32 | 93.04 | 37.95 | 2HMA | CLA | 603 |
| H | 0.020008  | 44.40 | 94.67 | 37.79 | 3HMA | CLA | 603 |
| H | 0.064014  | 47.72 | 95.38 | 38.12 | 1HAA | CLA | 603 |
| H | 0.077293  | 48.19 | 94.99 | 39.64 | 2HAA | CLA | 603 |
| H | 0.093335  | 47.24 | 96.66 | 40.44 | 1HBA | CLA | 603 |
| H | 0.089951  | 47.05 | 97.18 | 38.91 | 2HBA | CLA | 603 |
| H | 0.099362  | 46.43 | 90.61 | 31.98 | 1HMB | CLA | 603 |
| H | 0.105973  | 45.54 | 91.41 | 33.09 | 2HMB | CLA | 603 |
| H | 0.104336  | 47.07 | 91.89 | 32.76 | 3HMB | CLA | 603 |
| H | 0.153008  | 46.59 | 88.68 | 31.94 | HAB  | CLA | 603 |
| H | 0.187718  | 47.92 | 86.33 | 33.04 | 1HBB | CLA | 603 |
| H | 0.168595  | 47.20 | 86.48 | 31.48 | 2HBB | CLA | 603 |
| H | 0.161094  | 50.00 | 83.64 | 36.90 | 1HMC | CLA | 603 |
| H | 0.132040  | 48.68 | 84.12 | 36.06 | 2HMC | CLA | 603 |
| H | 0.121375  | 50.17 | 84.57 | 35.57 | 3HMC | CLA | 603 |
| H | -0.046354 | 50.67 | 84.86 | 40.30 | 1HAC | CLA | 603 |
| H | -0.029316 | 50.33 | 83.76 | 39.14 | 2HAC | CLA | 603 |
| H | 0.060828  | 52.68 | 83.90 | 39.47 | 1HBC | CLA | 603 |
| H | 0.068693  | 52.30 | 84.39 | 37.96 | 2HBC | CLA | 603 |
| H | 0.065890  | 52.64 | 85.49 | 39.12 | 3HBC | CLA | 603 |
| H | 0.137885  | 49.58 | 89.08 | 44.20 | 1HMD | CLA | 603 |

|    |           |       |       |       |      |     |     |
|----|-----------|-------|-------|-------|------|-----|-----|
| H  | 0.129136  | 49.07 | 87.70 | 43.49 | 2HMD | CLA | 603 |
| H  | 0.115590  | 50.60 | 88.21 | 43.27 | 3HMD | CLA | 603 |
| H  | 0.261295  | 48.21 | 93.69 | 41.82 | HBD  | CLA | 603 |
| H  | 0.110322  | 43.44 | 91.50 | 42.08 | 1HED | CLA | 603 |
| H  | 0.098739  | 44.12 | 91.86 | 43.52 | 2HED | CLA | 603 |
| H  | 0.103841  | 43.61 | 93.06 | 42.54 | 3HED | CLA | 603 |
| H  | 0.061011  | 43.09 | 97.19 | 40.86 | H11  | CLA | 603 |
| H  | 0.073337  | 43.07 | 96.13 | 42.11 | H12  | CLA | 603 |
| H  | 0.155971  | 42.57 | 94.34 | 40.48 | H2   | CLA | 603 |
| H  | 0.091297  | 40.14 | 96.96 | 38.42 | H41  | CLA | 603 |
| H  | 0.100022  | 40.58 | 97.50 | 39.90 | H42  | CLA | 603 |
| H  | 0.120289  | 41.65 | 97.52 | 38.67 | H43  | CLA | 603 |
| H  | 0.090458  | 39.62 | 95.00 | 38.51 | H51  | CLA | 603 |
| H  | 0.065156  | 40.27 | 93.84 | 39.47 | H52  | CLA | 603 |
| H  | -0.118172 | 41.84 | 94.16 | 37.27 | H61  | CLA | 603 |
| H  | -0.059502 | 40.29 | 93.91 | 36.81 | H62  | CLA | 603 |
| H  | 0.078098  | 40.91 | 92.18 | 38.85 | H71  | CLA | 603 |
| H  | 0.043844  | 42.04 | 92.04 | 37.69 | H72  | CLA | 603 |
| H  | -0.075786 | 39.53 | 92.11 | 36.73 | H8   | CLA | 603 |
| H  | 0.105136  | 40.18 | 90.19 | 35.40 | H91  | CLA | 603 |
| H  | 0.103280  | 41.20 | 91.46 | 35.27 | H92  | CLA | 603 |
| H  | 0.121638  | 41.60 | 90.19 | 36.22 | H93  | CLA | 603 |
| H  | 0.028191  | 38.72 | 89.96 | 37.14 | 1H10 | CLA | 603 |
| H  | 0.025495  | 38.59 | 91.04 | 38.35 | 2H10 | CLA | 603 |
| H  | -0.072943 | 39.86 | 89.84 | 39.71 | 1H11 | CLA | 603 |
| H  | -0.084717 | 40.80 | 89.28 | 38.50 | 2H11 | CLA | 603 |
| H  | -0.000268 | 39.52 | 87.56 | 38.14 | 1H12 | CLA | 603 |
| H  | 0.038771  | 38.17 | 88.49 | 38.16 | 2H12 | CLA | 603 |
| H  | -0.028629 | 38.20 | 86.63 | 39.65 | H13  | CLA | 603 |
| H  | 0.098103  | 37.06 | 87.84 | 41.37 | 1H14 | CLA | 603 |
| H  | 0.093721  | 37.66 | 89.23 | 40.76 | 2H14 | CLA | 603 |
| H  | 0.110343  | 36.61 | 88.33 | 39.88 | 3H14 | CLA | 603 |
| H  | -0.010028 | 39.16 | 86.79 | 41.75 | 1H15 | CLA | 603 |
| H  | -0.071484 | 40.20 | 87.87 | 41.10 | 2H15 | CLA | 603 |
| H  | 0.028270  | 41.18 | 86.25 | 39.80 | 1H16 | CLA | 603 |
| H  | -0.015100 | 40.03 | 85.16 | 40.21 | 2H16 | CLA | 603 |
| H  | -0.023337 | 41.14 | 86.10 | 42.48 | 1H17 | CLA | 603 |
| H  | -0.002081 | 42.36 | 85.69 | 41.48 | 2H17 | CLA | 603 |
| H  | -0.073296 | 42.07 | 83.58 | 41.76 | H18  | CLA | 603 |
| H  | 0.110551  | 41.76 | 83.28 | 44.19 | 1H19 | CLA | 603 |
| H  | 0.082713  | 42.67 | 84.60 | 43.87 | 2H19 | CLA | 603 |
| H  | 0.112931  | 41.09 | 84.77 | 44.25 | 3H19 | CLA | 603 |
| H  | 0.088292  | 40.31 | 82.30 | 42.50 | 1H20 | CLA | 603 |
| H  | 0.067161  | 39.36 | 83.62 | 42.46 | 2H20 | CLA | 603 |
| H  | 0.087724  | 40.03 | 83.05 | 41.09 | 3H20 | CLA | 603 |
| Mg | 1.156918  | 59.55 | 73.78 | 36.00 | MG   | CLA | 604 |



|   |           |       |       |       |     |     |     |
|---|-----------|-------|-------|-------|-----|-----|-----|
| C | 0.039600  | 59.01 | 70.36 | 36.46 | CHA | CLA | 604 |
| C | -0.504259 | 56.97 | 74.48 | 38.17 | CHB | CLA | 604 |
| C | -0.225889 | 60.44 | 77.06 | 35.89 | CHC | CLA | 604 |
| C | -0.481308 | 62.42 | 72.99 | 34.20 | CHD | CLA | 604 |
| N | -0.559822 | 58.14 | 72.58 | 37.11 | NA  | CLA | 604 |
| C | 0.102817  | 58.11 | 71.19 | 37.16 | C1A | CLA | 604 |
| C | -0.055721 | 57.02 | 70.75 | 38.14 | C2A | CLA | 604 |
| C | 0.106719  | 56.20 | 72.00 | 38.34 | C3A | CLA | 604 |
| C | 0.362759  | 57.12 | 73.12 | 37.88 | C4A | CLA | 604 |
| C | -0.353386 | 54.96 | 71.84 | 37.46 | CMA | CLA | 604 |
| C | 0.186996  | 57.40 | 70.35 | 39.58 | CAA | CLA | 604 |
| C | -0.211581 | 58.65 | 69.61 | 39.95 | CBA | CLA | 604 |
| C | 0.608738  | 59.45 | 69.90 | 41.19 | CGA | CLA | 604 |
| O | -0.467971 | 59.58 | 68.91 | 41.90 | O1A | CLA | 604 |
| O | -0.467951 | 60.03 | 71.13 | 41.62 | O2A | CLA | 604 |
| N | -0.516195 | 58.87 | 75.45 | 36.91 | NB  | CLA | 604 |
| C | 0.193679  | 57.78 | 75.55 | 37.74 | C1B | CLA | 604 |
| C | 0.173880  | 57.70 | 76.93 | 38.23 | C2B | CLA | 604 |
| C | -0.210684 | 58.63 | 77.67 | 37.51 | C3B | CLA | 604 |
| C | 0.225697  | 59.36 | 76.73 | 36.71 | C4B | CLA | 604 |
| C | -0.319638 | 56.71 | 77.21 | 39.36 | CMB | CLA | 604 |
| C | -0.014517 | 58.74 | 79.13 | 37.59 | CAB | CLA | 604 |
| C | -0.499658 | 57.96 | 80.04 | 38.30 | CBB | CLA | 604 |
| N | -0.590212 | 61.09 | 74.85 | 35.09 | NC  | CLA | 604 |
| C | 0.046806  | 61.25 | 76.21 | 35.15 | C1C | CLA | 604 |
| C | 0.284194  | 62.44 | 76.60 | 34.43 | C2C | CLA | 604 |
| C | -0.426448 | 63.02 | 75.46 | 33.99 | C3C | CLA | 604 |
| C | 0.499686  | 62.18 | 74.35 | 34.40 | C4C | CLA | 604 |
| C | -0.496809 | 63.00 | 78.03 | 34.33 | CMC | CLA | 604 |
| C | 0.275835  | 64.37 | 75.33 | 33.25 | CAC | CLA | 604 |
| C | -0.221540 | 65.50 | 75.23 | 34.27 | CBC | CLA | 604 |
| N | -0.589037 | 60.48 | 72.10 | 35.37 | ND  | CLA | 604 |
| C | 0.366086  | 61.64 | 71.92 | 34.65 | C1D | CLA | 604 |
| C | 0.087739  | 61.91 | 70.50 | 34.44 | C2D | CLA | 604 |
| C | -0.218553 | 60.90 | 69.85 | 35.10 | C3D | CLA | 604 |
| C | 0.141330  | 60.06 | 70.84 | 35.69 | C4D | CLA | 604 |
| C | -0.342399 | 63.10 | 69.88 | 33.67 | CMD | CLA | 604 |
| C | 0.620434  | 60.35 | 68.57 | 35.48 | CAD | CLA | 604 |
| O | -0.496289 | 60.74 | 67.42 | 35.24 | OBD | CLA | 604 |
| C | -0.519101 | 59.07 | 68.84 | 36.34 | CBD | CLA | 604 |
| C | 0.808302  | 57.81 | 68.25 | 35.63 | CGD | CLA | 604 |
| O | -0.557587 | 57.01 | 67.59 | 36.30 | O1D | CLA | 604 |
| O | -0.438718 | 57.61 | 68.56 | 34.27 | O2D | CLA | 604 |
| C | 0.146616  | 56.44 | 68.24 | 33.63 | CED | CLA | 604 |
| C | 0.287818  | 61.04 | 71.05 | 42.67 | C1  | CLA | 604 |
| C | -0.347112 | 62.35 | 70.88 | 42.05 | C2  | CLA | 604 |

|   |           |       |       |       |      |     |     |
|---|-----------|-------|-------|-------|------|-----|-----|
| C | 0.157380  | 63.61 | 71.37 | 42.39 | C3   | CLA | 604 |
| C | -0.380582 | 63.89 | 72.28 | 43.62 | C4   | CLA | 604 |
| C | -0.353443 | 64.87 | 71.12 | 41.51 | C5   | CLA | 604 |
| C | -0.019519 | 65.32 | 69.68 | 41.22 | C6   | CLA | 604 |
| C | -0.153953 | 65.70 | 68.78 | 42.42 | C7   | CLA | 604 |
| C | 0.299395  | 66.72 | 67.64 | 42.36 | C8   | CLA | 604 |
| C | -0.454194 | 67.75 | 67.71 | 43.49 | C9   | CLA | 604 |
| C | 0.078132  | 67.12 | 67.03 | 41.00 | C10  | CLA | 604 |
| C | -0.051254 | 68.36 | 67.51 | 40.22 | C11  | CLA | 604 |
| C | -0.055620 | 68.08 | 67.23 | 38.75 | C12  | CLA | 604 |
| C | 0.368747  | 69.17 | 67.43 | 37.70 | C13  | CLA | 604 |
| C | -0.455481 | 68.93 | 68.75 | 36.98 | C14  | CLA | 604 |
| C | -0.340808 | 69.20 | 66.25 | 36.73 | C15  | CLA | 604 |
| C | 0.329211  | 70.53 | 65.76 | 36.14 | C16  | CLA | 604 |
| C | -0.149143 | 70.85 | 66.05 | 34.67 | C17  | CLA | 604 |
| H | 0.186287  | 56.19 | 74.72 | 38.76 | HHB  | CLA | 604 |
| H | 0.153074  | 60.67 | 78.03 | 35.84 | HHC  | CLA | 604 |
| H | 0.215201  | 63.25 | 72.75 | 33.68 | HHD  | CLA | 604 |
| H | 0.068959  | 56.62 | 69.94 | 37.72 | H2A  | CLA | 604 |
| H | 0.028488  | 55.90 | 72.18 | 39.28 | H3A  | CLA | 604 |
| H | 0.089230  | 54.38 | 72.65 | 37.56 | 1HMA | CLA | 604 |
| H | 0.112549  | 55.24 | 71.74 | 36.51 | 2HMA | CLA | 604 |
| H | 0.104176  | 54.45 | 71.03 | 37.75 | 3HMA | CLA | 604 |
| H | -0.007634 | 56.65 | 69.78 | 39.91 | 1HAA | CLA | 604 |
| H | -0.046977 | 57.43 | 71.20 | 40.10 | 2HAA | CLA | 604 |
| H | 0.092228  | 58.40 | 68.64 | 40.01 | 1HBA | CLA | 604 |
| H | 0.037350  | 59.29 | 69.74 | 39.18 | 2HBA | CLA | 604 |
| H | 0.080864  | 56.75 | 78.19 | 39.60 | 1HMB | CLA | 604 |
| H | 0.114102  | 55.79 | 76.98 | 39.07 | 2HMB | CLA | 604 |
| H | 0.106792  | 56.96 | 76.67 | 40.16 | 3HMB | CLA | 604 |
| H | 0.109363  | 59.48 | 79.53 | 37.05 | HAB  | CLA | 604 |
| H | 0.196350  | 57.20 | 79.72 | 38.86 | 1HBB | CLA | 604 |
| H | 0.163158  | 58.16 | 81.02 | 38.25 | 2HBB | CLA | 604 |
| H | 0.156123  | 63.83 | 78.03 | 33.77 | 1HMC | CLA | 604 |
| H | 0.129785  | 62.32 | 78.63 | 33.91 | 2HMC | CLA | 604 |
| H | 0.126095  | 63.22 | 78.37 | 35.25 | 3HMC | CLA | 604 |
| H | -0.027453 | 64.36 | 74.51 | 32.67 | 1HAC | CLA | 604 |
| H | -0.022139 | 64.51 | 76.14 | 32.67 | 2HAC | CLA | 604 |
| H | 0.031239  | 66.38 | 75.14 | 33.79 | 1HBC | CLA | 604 |
| H | 0.056540  | 65.52 | 76.05 | 34.84 | 2HBC | CLA | 604 |
| H | 0.080442  | 65.36 | 74.42 | 34.84 | 3HBC | CLA | 604 |
| H | 0.142125  | 63.02 | 68.88 | 33.70 | 1HMD | CLA | 604 |
| H | 0.110606  | 63.07 | 70.19 | 32.72 | 2HMD | CLA | 604 |
| H | 0.103726  | 63.95 | 70.16 | 34.10 | 3HMD | CLA | 604 |
| H | 0.184957  | 59.10 | 68.42 | 37.25 | HBD  | CLA | 604 |
| H | 0.091058  | 56.49 | 68.54 | 32.67 | 1HED | CLA | 604 |

|    |           |       |       |       |      |     |     |
|----|-----------|-------|-------|-------|------|-----|-----|
| H  | 0.067393  | 56.29 | 67.25 | 33.66 | 2HED | CLA | 604 |
| H  | 0.009283  | 55.68 | 68.71 | 34.08 | 3HED | CLA | 604 |
| H  | 0.037913  | 60.85 | 70.26 | 43.26 | H11  | CLA | 604 |
| H  | 0.054571  | 61.04 | 71.89 | 43.21 | H12  | CLA | 604 |
| H  | 0.165303  | 62.35 | 70.31 | 41.23 | H2   | CLA | 604 |
| H  | 0.119918  | 64.86 | 72.50 | 43.66 | H41  | CLA | 604 |
| H  | 0.139869  | 63.35 | 73.12 | 43.55 | H42  | CLA | 604 |
| H  | 0.105104  | 63.63 | 71.79 | 44.46 | H43  | CLA | 604 |
| H  | 0.132423  | 65.64 | 71.57 | 41.97 | H51  | CLA | 604 |
| H  | 0.113227  | 64.71 | 71.56 | 40.63 | H52  | CLA | 604 |
| H  | 0.043256  | 66.12 | 69.74 | 40.62 | H61  | CLA | 604 |
| H  | 0.056877  | 64.57 | 69.23 | 40.73 | H62  | CLA | 604 |
| H  | 0.030616  | 64.84 | 68.36 | 42.72 | H71  | CLA | 604 |
| H  | 0.061421  | 66.03 | 69.40 | 43.13 | H72  | CLA | 604 |
| H  | -0.042613 | 66.16 | 66.83 | 42.58 | H8   | CLA | 604 |
| H  | 0.100763  | 68.39 | 66.94 | 43.41 | H91  | CLA | 604 |
| H  | 0.088852  | 68.25 | 68.57 | 43.43 | H92  | CLA | 604 |
| H  | 0.110393  | 67.28 | 67.66 | 44.37 | H93  | CLA | 604 |
| H  | -0.054902 | 66.34 | 67.17 | 40.39 | 1H10 | CLA | 604 |
| H  | -0.001867 | 67.26 | 66.05 | 41.16 | 2H10 | CLA | 604 |
| H  | -0.004056 | 69.17 | 67.00 | 40.51 | 1H11 | CLA | 604 |
| H  | -0.014678 | 68.51 | 68.49 | 40.36 | 2H11 | CLA | 604 |
| H  | 0.003732  | 67.31 | 67.82 | 38.48 | 1H12 | CLA | 604 |
| H  | -0.001818 | 67.80 | 66.27 | 38.68 | 2H12 | CLA | 604 |
| H  | -0.049197 | 70.06 | 67.47 | 38.14 | H13  | CLA | 604 |
| H  | 0.109875  | 69.64 | 68.89 | 36.29 | 1H14 | CLA | 604 |
| H  | 0.095733  | 68.03 | 68.73 | 36.53 | 2H14 | CLA | 604 |
| H  | 0.097587  | 68.95 | 69.50 | 37.64 | 3H14 | CLA | 604 |
| H  | 0.050497  | 68.62 | 66.51 | 35.95 | 1H15 | CLA | 604 |
| H  | 0.078662  | 68.80 | 65.48 | 37.21 | 2H15 | CLA | 604 |
| H  | -0.063101 | 70.55 | 64.77 | 36.26 | 1H16 | CLA | 604 |
| H  | -0.094377 | 71.26 | 66.18 | 36.69 | 2H16 | CLA | 604 |
| H  | 0.020290  | 71.74 | 65.67 | 34.44 | 1H17 | CLA | 604 |
| H  | 0.031939  | 70.15 | 65.63 | 34.09 | 2H17 | CLA | 604 |
| H  | 0.025312  | 70.86 | 67.04 | 34.52 | 3H17 | CLA | 604 |
| Mg | 1.169200  | 56.29 | 74.11 | 43.53 | MG   | CHL | 606 |
| C  | -0.004739 | 61.36 | 74.99 | 45.90 | CAA  | CHL | 606 |
| C  | -0.112834 | 53.65 | 78.54 | 41.21 | CAB  | CHL | 606 |
| C  | 0.160477  | 52.98 | 70.37 | 40.68 | CAC  | CHL | 606 |
| C  | 0.627291  | 59.27 | 70.37 | 45.82 | CAD  | CHL | 606 |
| N  | -0.489633 | 57.93 | 74.93 | 44.74 | NA   | CHL | 606 |
| C  | -0.219908 | 61.93 | 74.56 | 47.26 | CBA  | CHL | 606 |
| C  | -0.367704 | 54.04 | 79.62 | 40.43 | CBB  | CHL | 606 |
| C  | -0.168957 | 51.69 | 70.16 | 41.43 | CBC  | CHL | 606 |
| C  | -0.692237 | 59.74 | 71.76 | 46.29 | CBD  | CHL | 606 |
| N  | -0.549527 | 55.67 | 75.98 | 43.04 | NB   | CHL | 606 |

|   |           |       |       |       |      |     |     |
|---|-----------|-------|-------|-------|------|-----|-----|
| O | -0.531678 | 59.81 | 69.34 | 46.22 | OBD  | CHL | 606 |
| C | 0.826782  | 63.42 | 74.47 | 47.61 | CGA  | CHL | 606 |
| C | 0.975656  | 59.51 | 71.90 | 47.81 | CGD  | CHL | 606 |
| N | -0.548096 | 54.95 | 73.24 | 42.21 | NC   | CHL | 606 |
| N | -0.486413 | 57.00 | 72.25 | 43.88 | ND   | CHL | 606 |
| C | 0.040004  | 60.45 | 71.07 | 49.91 | CED  | CHL | 606 |
| C | 0.087495  | 58.89 | 72.75 | 45.47 | CHA  | CHL | 606 |
| C | -0.519448 | 57.39 | 77.30 | 44.28 | CHB  | CHL | 606 |
| C | -0.373104 | 53.92 | 75.33 | 41.41 | CHC  | CHL | 606 |
| C | -0.358246 | 55.44 | 70.87 | 42.60 | CHD  | CHL | 606 |
| C | -0.410730 | 58.81 | 77.12 | 47.19 | CMA  | CHL | 606 |
| C | -0.236326 | 55.71 | 79.74 | 43.38 | CMB  | CHL | 606 |
| C | 0.440869  | 52.32 | 73.45 | 39.67 | CMC  | CHL | 606 |
| C | -0.266591 | 57.07 | 68.45 | 43.88 | CMD  | CHL | 606 |
| O | -0.537107 | 51.49 | 72.77 | 39.08 | OMC  | CHL | 606 |
| C | 0.018007  | 58.86 | 74.20 | 45.45 | C1A  | CHL | 606 |
| C | 0.290707  | 56.26 | 77.17 | 43.43 | C1B  | CHL | 606 |
| C | 0.332773  | 54.05 | 73.93 | 41.43 | C1C  | CHL | 606 |
| C | 0.191076  | 56.52 | 71.02 | 43.49 | C1D  | CHL | 606 |
| O | -0.589721 | 64.19 | 74.79 | 46.69 | O1A  | CHL | 606 |
| O | -0.623224 | 58.40 | 72.22 | 48.27 | O1D  | CHL | 606 |
| C | 0.037093  | 59.84 | 75.14 | 46.16 | C2A  | CHL | 606 |
| C | 0.078577  | 55.47 | 78.27 | 42.88 | C2B  | CHL | 606 |
| C | -0.147964 | 53.26 | 72.97 | 40.66 | C2C  | CHL | 606 |
| C | 0.084438  | 57.26 | 69.94 | 44.11 | C2D  | CHL | 606 |
| O | -0.485288 | 64.03 | 74.05 | 48.93 | O2A  | CHL | 606 |
| O | -0.399841 | 60.63 | 71.60 | 48.62 | O2D  | CHL | 606 |
| C | 0.179052  | 59.29 | 76.52 | 45.87 | C3A  | CHL | 606 |
| C | -0.054715 | 54.51 | 77.71 | 42.05 | C3B  | CHL | 606 |
| C | -0.234405 | 53.61 | 71.73 | 41.09 | C3C  | CHL | 606 |
| C | -0.158062 | 58.18 | 70.56 | 44.90 | C3D  | CHL | 606 |
| C | 0.345332  | 58.15 | 76.29 | 44.89 | C4A  | CHL | 606 |
| C | 0.233194  | 54.66 | 76.27 | 42.15 | C4B  | CHL | 606 |
| C | 0.342833  | 54.72 | 71.89 | 42.00 | C4C  | CHL | 606 |
| C | 0.130108  | 58.02 | 71.97 | 44.74 | C4D  | CHL | 606 |
| C | 0.345381  | 63.80 | 74.93 | 50.06 | C1   | CHL | 606 |
| C | -0.477083 | 65.08 | 75.09 | 50.82 | C2   | CHL | 606 |
| C | 0.260847  | 65.39 | 75.38 | 52.16 | C3   | CHL | 606 |
| C | -0.269607 | 64.41 | 75.62 | 53.34 | C4   | CHL | 606 |
| C | -0.336279 | 66.84 | 75.54 | 52.73 | C5   | CHL | 606 |
| H | 0.003832  | 61.76 | 75.86 | 45.61 | 1HAA | CHL | 606 |
| H | 0.003832  | 61.54 | 74.29 | 45.21 | 2HAA | CHL | 606 |
| H | 0.140703  | 52.67 | 78.31 | 41.19 | HAB  | CHL | 606 |
| H | -0.000428 | 52.79 | 70.37 | 39.70 | 1HAC | CHL | 606 |
| H | -0.000428 | 53.61 | 69.63 | 40.90 | 2HAC | CHL | 606 |
| H | 0.057072  | 61.55 | 75.21 | 47.93 | 1HBA | CHL | 606 |

|    |           |       |       |       |      |     |     |
|----|-----------|-------|-------|-------|------|-----|-----|
| H  | 0.057072  | 61.56 | 73.65 | 47.43 | 2HBA | CHL | 606 |
| H  | 0.167066  | 55.00 | 79.89 | 40.41 | 1HBB | CHL | 606 |
| H  | 0.167066  | 53.37 | 80.12 | 39.89 | 2HBB | CHL | 606 |
| H  | 0.046995  | 51.29 | 69.29 | 41.17 | 1HBC | CHL | 606 |
| H  | 0.046995  | 51.87 | 70.16 | 42.42 | 2HBC | CHL | 606 |
| H  | 0.046995  | 51.05 | 70.90 | 41.22 | 3HBC | CHL | 606 |
| H  | 0.218234  | 60.72 | 71.93 | 46.14 | HBD  | CHL | 606 |
| H  | 0.063428  | 61.35 | 70.92 | 50.34 | 1HED | CHL | 606 |
| H  | 0.063428  | 59.92 | 71.71 | 50.46 | 2HED | CHL | 606 |
| H  | 0.063428  | 59.96 | 70.20 | 49.85 | 3HED | CHL | 606 |
| H  | 0.175319  | 57.68 | 78.24 | 44.46 | HHB  | CHL | 606 |
| H  | 0.209400  | 53.23 | 75.70 | 40.80 | HHC  | CHL | 606 |
| H  | 0.200579  | 55.17 | 69.94 | 42.38 | HHD  | CHL | 606 |
| H  | 0.104969  | 58.45 | 78.04 | 47.02 | 1HMA | CHL | 606 |
| H  | 0.104969  | 58.10 | 76.54 | 47.58 | 2HMA | CHL | 606 |
| H  | 0.104969  | 59.58 | 77.18 | 47.82 | 3HMA | CHL | 606 |
| H  | 0.077125  | 55.09 | 80.36 | 42.90 | 1HMB | CHL | 606 |
| H  | 0.077125  | 55.55 | 79.80 | 44.36 | 2HMB | CHL | 606 |
| H  | 0.077125  | 56.66 | 80.00 | 43.18 | 3HMB | CHL | 606 |
| H  | 0.021209  | 52.34 | 74.43 | 39.46 | HMC  | CHL | 606 |
| H  | 0.090203  | 57.72 | 67.94 | 44.44 | 1HMD | CHL | 606 |
| H  | 0.090203  | 56.13 | 68.19 | 44.13 | 2HMD | CHL | 606 |
| H  | 0.090203  | 57.22 | 68.24 | 42.92 | 3HMD | CHL | 606 |
| H  | 0.205820  | 65.89 | 74.97 | 50.25 | H2   | CHL | 606 |
| H  | 0.016242  | 63.10 | 74.53 | 50.65 | H11  | CHL | 606 |
| H  | 0.016242  | 63.48 | 75.82 | 49.73 | H12  | CHL | 606 |
| H  | 0.059830  | 59.83 | 74.90 | 47.13 | H2A  | CHL | 606 |
| H  | 0.085694  | 64.94 | 75.80 | 54.18 | H41  | CHL | 606 |
| H  | 0.085694  | 63.83 | 76.40 | 53.14 | H42  | CHL | 606 |
| H  | 0.085694  | 63.85 | 74.80 | 53.48 | H43  | CHL | 606 |
| H  | 0.032055  | 59.95 | 77.16 | 45.48 | H3A  | CHL | 606 |
| H  | 0.058595  | 67.50 | 75.40 | 52.00 | H51  | CHL | 606 |
| H  | 0.058595  | 66.95 | 76.46 | 53.10 | H52  | CHL | 606 |
| H  | 0.058595  | 66.99 | 74.87 | 53.45 | H53  | CHL | 606 |
| Mg | 1.169200  | 48.13 | 74.84 | 38.79 | MG   | CHL | 607 |
| C  | -0.004739 | 43.85 | 73.53 | 35.19 | CAA  | CHL | 607 |
| C  | -0.112834 | 49.94 | 80.18 | 38.95 | CAB  | CHL | 607 |
| C  | 0.160477  | 50.81 | 73.71 | 43.80 | CAC  | CHL | 607 |
| C  | 0.627291  | 45.83 | 70.07 | 38.38 | CAD  | CHL | 607 |
| N  | -0.489633 | 46.80 | 74.69 | 37.06 | NA   | CHL | 607 |
| C  | -0.219908 | 43.03 | 73.77 | 33.89 | CBA  | CHL | 607 |
| C  | -0.367704 | 50.91 | 80.80 | 38.16 | CBB  | CHL | 607 |
| C  | -0.168957 | 50.03 | 73.94 | 45.08 | CBC  | CHL | 607 |
| C  | -0.692237 | 45.44 | 70.95 | 37.13 | CBD  | CHL | 607 |
| N  | -0.549527 | 48.40 | 76.82 | 38.45 | NB   | CHL | 607 |
| O  | -0.531678 | 45.43 | 68.92 | 38.50 | OBD  | CHL | 607 |

|   |           |       |       |       |     |     |     |
|---|-----------|-------|-------|-------|-----|-----|-----|
| C | 0.826782  | 42.34 | 75.15 | 33.81 | CGA | CHL | 607 |
| C | 0.975656  | 45.97 | 70.26 | 35.83 | CGD | CHL | 607 |
| N | -0.548096 | 49.20 | 74.97 | 40.59 | NC  | CHL | 607 |
| N | -0.486413 | 47.66 | 72.95 | 39.31 | ND  | CHL | 607 |
| C | 0.040004  | 45.29 | 68.80 | 33.91 | CED | CHL | 607 |
| C | 0.087495  | 46.12 | 72.31 | 37.40 | CHA | CHL | 607 |
| C | -0.519448 | 47.12 | 77.04 | 36.34 | CHB | CHL | 607 |
| C | -0.373104 | 49.79 | 77.34 | 40.43 | CHC | CHL | 607 |
| C | -0.358246 | 48.80 | 72.72 | 41.47 | CHD | CHL | 607 |
| C | -0.410730 | 46.23 | 75.57 | 33.68 | CMA | CHL | 607 |
| C | -0.236326 | 48.24 | 79.93 | 36.28 | CMB | CHL | 607 |
| C | 0.440869  | 51.01 | 76.88 | 43.18 | CMC | CHL | 607 |
| C | -0.266591 | 47.69 | 69.74 | 41.36 | CMD | CHL | 607 |
| O | -0.537107 | 51.18 | 78.10 | 43.10 | OMC | CHL | 607 |
| C | 0.018007  | 46.09 | 73.56 | 36.64 | C1A | CHL | 607 |
| C | 0.290707  | 47.95 | 77.52 | 37.35 | C1B | CHL | 607 |
| C | 0.332773  | 49.81 | 76.11 | 41.08 | C1C | CHL | 607 |
| C | 0.191076  | 48.00 | 72.21 | 40.43 | C1D | CHL | 607 |
| O | -0.589721 | 42.19 | 75.76 | 34.86 | O1A | CHL | 607 |
| O | -0.623224 | 47.19 | 70.22 | 35.57 | O1D | CHL | 607 |
| C | 0.037093  | 45.36 | 73.85 | 35.33 | C2A | CHL | 607 |
| C | 0.078577  | 48.52 | 78.86 | 37.41 | C2B | CHL | 607 |
| C | -0.147964 | 50.40 | 75.82 | 42.39 | C2C | CHL | 607 |
| C | 0.084438  | 47.44 | 70.88 | 40.36 | C2D | CHL | 607 |
| O | -0.485288 | 41.87 | 75.80 | 32.61 | O2A | CHL | 607 |
| O | -0.399841 | 44.98 | 69.49 | 35.09 | O2D | CHL | 607 |
| C | 0.179052  | 45.65 | 75.33 | 35.06 | C3A | CHL | 607 |
| C | -0.054715 | 49.24 | 78.96 | 38.58 | C3B | CHL | 607 |
| C | -0.234405 | 50.21 | 74.50 | 42.62 | C3C | CHL | 607 |
| C | -0.158062 | 46.68 | 70.87 | 39.22 | C3D | CHL | 607 |
| C | 0.345332  | 46.58 | 75.75 | 36.19 | C4A | CHL | 607 |
| C | 0.233194  | 49.15 | 77.67 | 39.23 | C4B | CHL | 607 |
| C | 0.342833  | 49.36 | 73.99 | 41.55 | C4C | CHL | 607 |
| C | 0.130108  | 46.83 | 72.14 | 38.59 | C4D | CHL | 607 |
| C | 0.345381  | 42.85 | 76.53 | 31.83 | C1  | CHL | 607 |
| C | -0.477083 | 43.12 | 77.88 | 32.47 | C2  | CHL | 607 |
| C | 0.260847  | 44.14 | 78.72 | 32.05 | C3  | CHL | 607 |
| C | -0.269607 | 45.11 | 78.39 | 30.89 | C4  | CHL | 607 |
| C | -0.336279 | 44.52 | 80.09 | 32.60 | C5  | CHL | 607 |
| C | 0.119257  | 44.90 | 80.24 | 34.05 | C6  | CHL | 607 |
| C | -0.175039 | 44.07 | 81.43 | 34.56 | C7  | CHL | 607 |
| C | 0.331362  | 44.77 | 82.61 | 35.23 | C8  | CHL | 607 |
| C | -0.313835 | 45.88 | 83.26 | 34.43 | C9  | CHL | 607 |
| C | -0.284648 | 44.97 | 82.62 | 36.73 | C10 | CHL | 607 |
| C | 0.041634  | 45.77 | 83.70 | 37.43 | C11 | CHL | 607 |
| C | -0.154439 | 46.39 | 82.93 | 38.59 | C12 | CHL | 607 |

|   |           |       |       |       |      |     |     |
|---|-----------|-------|-------|-------|------|-----|-----|
| C | 0.196709  | 45.91 | 83.18 | 40.02 | C13  | CHL | 607 |
| C | -0.232704 | 44.46 | 82.87 | 40.38 | C14  | CHL | 607 |
| C | -0.201414 | 46.33 | 84.49 | 40.64 | C15  | CHL | 607 |
| C | 0.209589  | 47.60 | 84.44 | 41.44 | C16  | CHL | 607 |
| C | -0.269983 | 47.61 | 83.70 | 42.76 | C17  | CHL | 607 |
| C | 0.432452  | 47.98 | 84.70 | 43.84 | C18  | CHL | 607 |
| C | -0.315373 | 46.96 | 84.50 | 44.96 | C19  | CHL | 607 |
| C | -0.315373 | 49.45 | 84.67 | 44.27 | C20  | CHL | 607 |
| H | 0.003832  | 43.40 | 74.07 | 35.91 | 1HAA | CHL | 607 |
| H | 0.003832  | 43.77 | 72.56 | 35.40 | 2HAA | CHL | 607 |
| H | 0.140703  | 49.72 | 80.60 | 39.83 | HAB  | CHL | 607 |
| H | -0.000428 | 50.78 | 72.73 | 43.58 | 1HAC | CHL | 607 |
| H | -0.000428 | 51.76 | 73.99 | 43.94 | 2HAC | CHL | 607 |
| H | 0.057072  | 43.64 | 73.68 | 33.10 | 1HBA | CHL | 607 |
| H | 0.057072  | 42.31 | 73.07 | 33.84 | 2HBA | CHL | 607 |
| H | 0.167066  | 51.16 | 80.41 | 37.27 | 1HBB | CHL | 607 |
| H | 0.167066  | 51.35 | 81.64 | 38.48 | 2HBB | CHL | 607 |
| H | 0.046995  | 50.44 | 73.42 | 45.83 | 1HBC | CHL | 607 |
| H | 0.046995  | 50.05 | 74.92 | 45.31 | 2HBC | CHL | 607 |
| H | 0.046995  | 49.08 | 73.65 | 44.96 | 3HBC | CHL | 607 |
| H | 0.218234  | 44.46 | 71.08 | 37.00 | HBD  | CHL | 607 |
| H | 0.063428  | 44.47 | 68.34 | 33.56 | 1HED | CHL | 607 |
| H | 0.063428  | 45.62 | 69.44 | 33.22 | 2HED | CHL | 607 |
| H | 0.063428  | 45.99 | 68.11 | 34.10 | 3HED | CHL | 607 |
| H | 0.175319  | 46.89 | 77.69 | 35.62 | HHB  | CHL | 607 |
| H | 0.209400  | 50.29 | 78.08 | 40.88 | HHC  | CHL | 607 |
| H | 0.200579  | 48.98 | 72.10 | 42.23 | HHH  | CHL | 607 |
| H | 0.104969  | 46.39 | 76.55 | 33.55 | 1HMA | CHL | 607 |
| H | 0.104969  | 47.09 | 75.07 | 33.58 | 2HMA | CHL | 607 |
| H | 0.104969  | 45.58 | 75.25 | 32.98 | 3HMA | CHL | 607 |
| H | 0.077125  | 48.72 | 80.78 | 36.49 | 1HMB | CHL | 607 |
| H | 0.077125  | 48.57 | 79.57 | 35.40 | 2HMB | CHL | 607 |
| H | 0.077125  | 47.26 | 80.10 | 36.22 | 3HMB | CHL | 607 |
| H | 0.021209  | 51.40 | 76.51 | 44.02 | HMC  | CHL | 607 |
| H | 0.090203  | 47.18 | 68.93 | 41.07 | 1HMD | CHL | 607 |
| H | 0.090203  | 48.67 | 69.53 | 41.38 | 2HMD | CHL | 607 |
| H | 0.090203  | 47.39 | 70.03 | 42.26 | 3HMD | CHL | 607 |
| H | 0.205820  | 42.53 | 78.17 | 33.23 | H2   | CHL | 607 |
| H | -0.019695 | 44.00 | 83.25 | 35.20 | H8   | CHL | 607 |
| H | 0.016242  | 42.49 | 76.66 | 30.90 | H11  | CHL | 607 |
| H | 0.016242  | 43.69 | 76.00 | 31.79 | H12  | CHL | 607 |
| H | -0.010572 | 46.44 | 82.45 | 40.46 | H13  | CHL | 607 |
| H | -0.061651 | 47.90 | 85.63 | 43.49 | H18  | CHL | 607 |
| H | 0.059830  | 45.73 | 73.21 | 34.66 | H2A  | CHL | 607 |
| H | 0.085694  | 45.76 | 79.14 | 30.77 | H41  | CHL | 607 |
| H | 0.085694  | 45.60 | 77.54 | 31.10 | H42  | CHL | 607 |

|    |           |       |       |       |      |     |     |
|----|-----------|-------|-------|-------|------|-----|-----|
| H  | 0.085694  | 44.58 | 78.26 | 30.05 | H43  | CHL | 607 |
| H  | 0.032055  | 44.81 | 75.88 | 35.06 | H3A  | CHL | 607 |
| H  | 0.096900  | 43.74 | 80.69 | 32.45 | H51  | CHL | 607 |
| H  | 0.096900  | 45.31 | 80.41 | 32.07 | H52  | CHL | 607 |
| H  | -0.002304 | 45.88 | 80.43 | 34.14 | H61  | CHL | 607 |
| H  | -0.002304 | 44.68 | 79.41 | 34.56 | H62  | CHL | 607 |
| H  | 0.027697  | 43.42 | 81.07 | 35.22 | H71  | CHL | 607 |
| H  | 0.027697  | 43.58 | 81.80 | 33.77 | H72  | CHL | 607 |
| H  | 0.069285  | 46.27 | 84.02 | 34.95 | H91  | CHL | 607 |
| H  | 0.069285  | 46.59 | 82.59 | 34.23 | H92  | CHL | 607 |
| H  | 0.069285  | 45.50 | 83.61 | 33.57 | H93  | CHL | 607 |
| H  | 0.073653  | 45.41 | 81.75 | 36.95 | 1H10 | CHL | 607 |
| H  | 0.073653  | 44.05 | 82.65 | 37.13 | 2H10 | CHL | 607 |
| H  | 0.015417  | 45.18 | 84.44 | 37.76 | 1H11 | CHL | 607 |
| H  | 0.015417  | 46.48 | 84.08 | 36.83 | 2H11 | CHL | 607 |
| H  | 0.036623  | 47.37 | 83.13 | 38.57 | 1H12 | CHL | 607 |
| H  | 0.036623  | 46.24 | 81.96 | 38.39 | 2H12 | CHL | 607 |
| H  | 0.048461  | 44.31 | 83.08 | 41.34 | 1H14 | CHL | 607 |
| H  | 0.048461  | 43.86 | 83.43 | 39.82 | 2H14 | CHL | 607 |
| H  | 0.048461  | 44.28 | 81.90 | 40.21 | 3H14 | CHL | 607 |
| H  | 0.037455  | 45.60 | 84.80 | 41.24 | 1H15 | CHL | 607 |
| H  | 0.037455  | 46.47 | 85.15 | 39.90 | 2H15 | CHL | 607 |
| H  | -0.021542 | 47.86 | 85.38 | 41.64 | 1H16 | CHL | 607 |
| H  | -0.021542 | 48.29 | 84.01 | 40.87 | 2H16 | CHL | 607 |
| H  | 0.043717  | 48.29 | 82.96 | 42.73 | 1H17 | CHL | 607 |
| H  | 0.043717  | 46.71 | 83.32 | 42.94 | 2H17 | CHL | 607 |
| H  | 0.058595  | 47.16 | 85.14 | 45.71 | 1H19 | CHL | 607 |
| H  | 0.058595  | 46.04 | 84.67 | 44.61 | 2H19 | CHL | 607 |
| H  | 0.058595  | 47.02 | 83.56 | 45.30 | 3H19 | CHL | 607 |
| H  | 0.058595  | 49.61 | 85.35 | 44.99 | 1H20 | CHL | 607 |
| H  | 0.058595  | 49.68 | 83.76 | 44.63 | 2H20 | CHL | 607 |
| H  | 0.058595  | 50.03 | 84.87 | 43.48 | 3H20 | CHL | 607 |
| Mg | 1.169200  | 64.10 | 87.28 | 47.36 | MG   | CHL | 608 |
| C  | -0.004739 | 64.07 | 84.71 | 42.49 | CAA  | CHL | 608 |
| C  | -0.112834 | 66.08 | 84.01 | 51.62 | CAB  | CHL | 608 |
| C  | 0.160477  | 65.45 | 92.21 | 50.00 | CAC  | CHL | 608 |
| C  | 0.627291  | 62.46 | 89.56 | 42.88 | CAD  | CHL | 608 |
| N  | -0.489633 | 63.70 | 85.85 | 45.78 | NA   | CHL | 608 |
| C  | -0.219908 | 65.52 | 84.29 | 42.65 | CBA  | CHL | 608 |
| C  | -0.367704 | 66.58 | 84.74 | 52.68 | CBB  | CHL | 608 |
| C  | -0.168957 | 66.88 | 92.57 | 49.65 | CBC  | CHL | 608 |
| C  | -0.692237 | 62.51 | 88.01 | 42.70 | CBD  | CHL | 608 |
| N  | -0.549527 | 64.74 | 85.77 | 48.58 | NB   | CHL | 608 |
| O  | -0.531678 | 62.09 | 90.29 | 41.97 | OBD  | CHL | 608 |
| C  | 0.826782  | 66.53 | 85.33 | 42.39 | CGA  | CHL | 608 |
| C  | 0.975656  | 61.08 | 87.46 | 42.38 | CGD  | CHL | 608 |



|   |           |       |       |       |     |     |     |
|---|-----------|-------|-------|-------|-----|-----|-----|
| N | -0.548096 | 64.67 | 88.70 | 48.77 | NC  | CHL | 608 |
| N | -0.486413 | 63.63 | 88.78 | 46.13 | ND  | CHL | 608 |
| C | 0.040004  | 59.77 | 86.54 | 40.51 | CED | CHL | 608 |
| C | 0.087495  | 63.05 | 87.48 | 44.04 | CHA | CHL | 608 |
| C | -0.519448 | 64.34 | 83.85 | 47.06 | CHB | CHL | 608 |
| C | -0.373104 | 65.43 | 87.14 | 50.52 | CHC | CHL | 608 |
| C | -0.358246 | 64.15 | 90.73 | 47.49 | CHD | CHL | 608 |
| C | -0.410730 | 61.91 | 83.13 | 44.98 | CMA | CHL | 608 |
| C | -0.236326 | 65.77 | 82.20 | 49.26 | CMB | CHL | 608 |
| C | 0.440869  | 66.18 | 89.74 | 51.98 | CMC | CHL | 608 |
| C | -0.266591 | 63.21 | 92.37 | 44.92 | CMD | CHL | 608 |
| O | -0.537107 | 66.62 | 88.93 | 52.79 | OMC | CHL | 608 |
| C | 0.018007  | 63.29 | 86.15 | 44.48 | C1A | CHL | 608 |
| C | 0.290707  | 64.77 | 84.43 | 48.26 | C1B | CHL | 608 |
| C | 0.332773  | 65.18 | 88.44 | 50.03 | C1C | CHL | 608 |
| C | 0.191076  | 63.69 | 90.15 | 46.31 | C1D | CHL | 608 |
| O | -0.589721 | 66.59 | 86.30 | 43.14 | O1A | CHL | 608 |
| O | -0.623224 | 60.20 | 87.34 | 43.23 | O1D | CHL | 608 |
| C | 0.037093  | 63.13 | 84.87 | 43.68 | C2A | CHL | 608 |
| C | 0.078577  | 65.40 | 83.71 | 49.35 | C2B | CHL | 608 |
| C | -0.147964 | 65.53 | 89.71 | 50.67 | C2C | CHL | 608 |
| C | 0.084438  | 63.26 | 90.85 | 45.11 | C2D | CHL | 608 |
| O | -0.485288 | 67.46 | 85.21 | 41.28 | O2A | CHL | 608 |
| O | -0.399841 | 60.90 | 87.15 | 41.01 | O2D | CHL | 608 |
| C | 0.179052  | 63.28 | 83.77 | 44.71 | C3A | CHL | 608 |
| C | -0.054715 | 65.60 | 84.60 | 50.37 | C3B | CHL | 608 |
| C | -0.234405 | 65.19 | 90.70 | 49.81 | C3C | CHL | 608 |
| C | -0.158062 | 62.92 | 89.86 | 44.22 | C3D | CHL | 608 |
| C | 0.345332  | 63.84 | 84.48 | 45.93 | C4A | CHL | 608 |
| C | 0.233194  | 65.23 | 85.92 | 49.86 | C4B | CHL | 608 |
| C | 0.342833  | 64.61 | 90.07 | 48.64 | C4C | CHL | 608 |
| C | 0.130108  | 63.22 | 88.60 | 44.84 | C4D | CHL | 608 |
| C | 0.345381  | 68.30 | 86.37 | 40.99 | C1  | CHL | 608 |
| C | -0.477083 | 69.60 | 86.16 | 41.60 | C2  | CHL | 608 |
| C | 0.260847  | 70.55 | 85.15 | 41.45 | C3  | CHL | 608 |
| C | -0.269607 | 70.49 | 83.91 | 40.52 | C4  | CHL | 608 |
| C | -0.336279 | 71.79 | 85.07 | 42.35 | C5  | CHL | 608 |
| C | 0.119257  | 71.69 | 85.09 | 43.89 | C6  | CHL | 608 |
| C | -0.175039 | 70.47 | 84.65 | 44.72 | C7  | CHL | 608 |
| C | 0.331362  | 70.49 | 83.42 | 45.61 | C8  | CHL | 608 |
| C | -0.313835 | 71.21 | 83.73 | 46.93 | C9  | CHL | 608 |
| C | -0.284648 | 69.01 | 83.09 | 45.79 | C10 | CHL | 608 |
| C | 0.041634  | 68.54 | 81.64 | 45.77 | C11 | CHL | 608 |
| C | -0.154439 | 67.86 | 81.36 | 44.43 | C12 | CHL | 608 |
| C | 0.196709  | 66.85 | 80.21 | 44.34 | C13 | CHL | 608 |
| C | -0.232704 | 67.46 | 78.82 | 44.11 | C14 | CHL | 608 |

|   |           |       |       |       |      |     |     |
|---|-----------|-------|-------|-------|------|-----|-----|
| C | -0.201414 | 65.56 | 80.61 | 43.61 | C15  | CHL | 608 |
| C | 0.209589  | 65.10 | 80.03 | 42.27 | C16  | CHL | 608 |
| C | -0.269983 | 64.77 | 80.96 | 41.10 | C17  | CHL | 608 |
| C | 0.432452  | 65.71 | 81.11 | 39.89 | C18  | CHL | 608 |
| C | -0.315373 | 66.99 | 81.90 | 40.11 | C19  | CHL | 608 |
| C | -0.315373 | 66.22 | 79.84 | 39.25 | C20  | CHL | 608 |
| H | 0.003832  | 64.09 | 85.60 | 42.03 | 1HAA | CHL | 608 |
| H | 0.003832  | 63.64 | 84.04 | 41.88 | 2HAA | CHL | 608 |
| H | 0.140703  | 66.04 | 83.02 | 51.71 | HAB  | CHL | 608 |
| H | -0.000428 | 64.83 | 92.73 | 49.40 | 1HAC | CHL | 608 |
| H | -0.000428 | 65.27 | 92.46 | 50.95 | 2HAC | CHL | 608 |
| H | 0.057072  | 65.65 | 83.97 | 43.59 | 1HBA | CHL | 608 |
| H | 0.057072  | 65.70 | 83.53 | 42.02 | 2HBA | CHL | 608 |
| H | 0.167066  | 66.63 | 85.73 | 52.62 | 1HBB | CHL | 608 |
| H | 0.167066  | 66.89 | 84.26 | 53.50 | 2HBB | CHL | 608 |
| H | 0.046995  | 67.02 | 93.56 | 49.79 | 1HBC | CHL | 608 |
| H | 0.046995  | 67.51 | 92.07 | 50.25 | 2HBC | CHL | 608 |
| H | 0.046995  | 67.07 | 92.34 | 48.70 | 3HBC | CHL | 608 |
| H | 0.218234  | 63.10 | 87.71 | 41.95 | HBD  | CHL | 608 |
| H | 0.063428  | 59.87 | 86.42 | 39.52 | 1HED | CHL | 608 |
| H | 0.063428  | 59.66 | 85.65 | 40.94 | 2HED | CHL | 608 |
| H | 0.063428  | 58.97 | 87.11 | 40.70 | 3HED | CHL | 608 |
| H | 0.175319  | 64.41 | 82.85 | 47.01 | HHB  | CHL | 608 |
| H | 0.209400  | 65.79 | 87.09 | 51.45 | HHC  | CHL | 608 |
| H | 0.200579  | 64.15 | 91.73 | 47.52 | HHD  | CHL | 608 |
| H | 0.104969  | 62.01 | 82.40 | 45.66 | 1HMA | CHL | 608 |
| H | 0.104969  | 61.28 | 83.82 | 45.33 | 2HMA | CHL | 608 |
| H | 0.104969  | 61.55 | 82.74 | 44.13 | 3HMA | CHL | 608 |
| H | 0.077125  | 66.19 | 81.92 | 50.12 | 1HMB | CHL | 608 |
| H | 0.077125  | 64.95 | 81.66 | 49.09 | 2HMB | CHL | 608 |
| H | 0.077125  | 66.42 | 82.07 | 48.51 | 3HMB | CHL | 608 |
| H | 0.021209  | 66.29 | 90.68 | 52.30 | HMC  | CHL | 608 |
| H | 0.090203  | 62.87 | 92.58 | 44.00 | 1HMD | CHL | 608 |
| H | 0.090203  | 62.60 | 92.77 | 45.60 | 2HMD | CHL | 608 |
| H | 0.090203  | 64.13 | 92.74 | 45.03 | 3HMD | CHL | 608 |
| H | 0.205820  | 69.87 | 86.87 | 42.25 | H2   | CHL | 608 |
| H | -0.019695 | 70.99 | 82.64 | 45.23 | H8   | CHL | 608 |
| H | 0.016242  | 67.88 | 87.20 | 41.38 | H11  | CHL | 608 |
| H | 0.016242  | 68.40 | 86.48 | 40.00 | H12  | CHL | 608 |
| H | -0.010572 | 66.51 | 80.03 | 45.26 | H13  | CHL | 608 |
| H | -0.061651 | 65.07 | 81.60 | 39.29 | H18  | CHL | 608 |
| H | 0.059830  | 62.24 | 84.84 | 43.22 | H2A  | CHL | 608 |
| H | 0.085694  | 71.32 | 83.37 | 40.64 | H41  | CHL | 608 |
| H | 0.085694  | 69.69 | 83.36 | 40.76 | H42  | CHL | 608 |
| H | 0.085694  | 70.42 | 84.22 | 39.57 | H43  | CHL | 608 |
| H | 0.032055  | 63.88 | 83.03 | 44.41 | H3A  | CHL | 608 |

|    |           |       |       |       |      |     |     |
|----|-----------|-------|-------|-------|------|-----|-----|
| H  | 0.096900  | 72.36 | 85.85 | 42.09 | H51  | CHL | 608 |
| H  | 0.096900  | 72.26 | 84.23 | 42.10 | H52  | CHL | 608 |
| H  | -0.002304 | 71.86 | 86.04 | 44.15 | H61  | CHL | 608 |
| H  | -0.002304 | 72.45 | 84.51 | 44.21 | H62  | CHL | 608 |
| H  | 0.027697  | 69.72 | 84.50 | 44.07 | H71  | CHL | 608 |
| H  | 0.027697  | 70.24 | 85.41 | 45.32 | H72  | CHL | 608 |
| H  | 0.069285  | 71.22 | 82.91 | 47.51 | H91  | CHL | 608 |
| H  | 0.069285  | 72.15 | 84.01 | 46.73 | H92  | CHL | 608 |
| H  | 0.069285  | 70.74 | 84.47 | 47.40 | H93  | CHL | 608 |
| H  | 0.073653  | 68.51 | 83.57 | 45.07 | 1H10 | CHL | 608 |
| H  | 0.073653  | 68.73 | 83.47 | 46.68 | 2H10 | CHL | 608 |
| H  | 0.015417  | 67.90 | 81.48 | 46.51 | 1H11 | CHL | 608 |
| H  | 0.015417  | 69.34 | 81.04 | 45.87 | 2H11 | CHL | 608 |
| H  | 0.036623  | 68.58 | 81.17 | 43.77 | 1H12 | CHL | 608 |
| H  | 0.036623  | 67.37 | 82.19 | 44.17 | 2H12 | CHL | 608 |
| H  | 0.048461  | 66.73 | 78.14 | 44.06 | 1H14 | CHL | 608 |
| H  | 0.048461  | 67.97 | 78.82 | 43.25 | 2H14 | CHL | 608 |
| H  | 0.048461  | 68.07 | 78.59 | 44.86 | 3H14 | CHL | 608 |
| H  | 0.037455  | 65.62 | 81.60 | 43.47 | 1H15 | CHL | 608 |
| H  | 0.037455  | 64.81 | 80.42 | 44.26 | 2H15 | CHL | 608 |
| H  | -0.021542 | 64.27 | 79.50 | 42.46 | 1H16 | CHL | 608 |
| H  | -0.021542 | 65.83 | 79.42 | 41.96 | 2H16 | CHL | 608 |
| H  | 0.043717  | 64.67 | 81.88 | 41.49 | 1H17 | CHL | 608 |
| H  | 0.043717  | 63.89 | 80.65 | 40.74 | 2H17 | CHL | 608 |
| H  | 0.058595  | 67.51 | 81.93 | 39.26 | 1H19 | CHL | 608 |
| H  | 0.058595  | 66.76 | 82.83 | 40.39 | 2H19 | CHL | 608 |
| H  | 0.058595  | 67.53 | 81.46 | 40.82 | 3H19 | CHL | 608 |
| H  | 0.058595  | 66.81 | 80.06 | 38.48 | 1H20 | CHL | 608 |
| H  | 0.058595  | 66.73 | 79.31 | 39.93 | 2H20 | CHL | 608 |
| H  | 0.058595  | 65.44 | 79.30 | 38.93 | 3H20 | CHL | 608 |
| Mg | 1.169200  | 53.47 | 87.38 | 46.16 | MG   | CHL | 609 |
| C  | -0.004739 | 51.02 | 92.11 | 47.18 | CAA  | CHL | 609 |
| C  | -0.112834 | 52.54 | 84.00 | 50.70 | CAB  | CHL | 609 |
| C  | 0.160477  | 53.40 | 83.00 | 42.42 | CAC  | CHL | 609 |
| C  | 0.627291  | 53.02 | 91.17 | 42.45 | CAD  | CHL | 609 |
| N  | -0.489633 | 53.06 | 89.35 | 46.97 | NA   | CHL | 609 |
| C  | -0.219908 | 49.96 | 91.08 | 46.76 | CBA  | CHL | 609 |
| C  | -0.367704 | 52.65 | 82.67 | 50.45 | CBB  | CHL | 609 |
| C  | -0.168957 | 52.00 | 82.47 | 42.09 | CBC  | CHL | 609 |
| C  | -0.692237 | 52.82 | 91.79 | 43.88 | CBD  | CHL | 609 |
| N  | -0.549527 | 53.09 | 86.55 | 48.00 | NB   | CHL | 609 |
| O  | -0.531678 | 53.00 | 91.88 | 41.44 | OBD  | CHL | 609 |
| C  | 0.826782  | 48.50 | 91.28 | 46.88 | CGA  | CHL | 609 |
| C  | 0.975656  | 53.91 | 92.88 | 44.14 | CGD  | CHL | 609 |
| N  | -0.548096 | 53.44 | 85.49 | 45.29 | NC   | CHL | 609 |
| N  | -0.486413 | 53.46 | 88.17 | 44.28 | ND   | CHL | 609 |

|   |           |       |       |       |     |     |     |
|---|-----------|-------|-------|-------|-----|-----|-----|
| C | 0.040004  | 54.35 | 95.18 | 43.48 | CED | CHL | 609 |
| C | 0.087495  | 52.97 | 90.59 | 44.83 | CHA | CHL | 609 |
| C | -0.519448 | 52.83 | 88.64 | 49.31 | CHB | CHL | 609 |
| C | -0.373104 | 53.12 | 84.17 | 47.36 | CHC | CHL | 609 |
| C | -0.358246 | 53.38 | 86.16 | 42.91 | CHD | CHL | 609 |
| C | -0.410730 | 54.06 | 91.70 | 49.12 | CMA | CHL | 609 |
| C | -0.236326 | 52.90 | 86.80 | 51.74 | CMB | CHL | 609 |
| C | 0.440869  | 53.34 | 81.81 | 45.43 | CMC | CHL | 609 |
| C | -0.266591 | 53.21 | 88.26 | 40.45 | CMD | CHL | 609 |
| O | -0.537107 | 53.19 | 81.20 | 46.49 | OMC | CHL | 609 |
| C | 0.018007  | 52.88 | 90.52 | 46.24 | C1A | CHL | 609 |
| C | 0.290707  | 52.91 | 87.25 | 49.17 | C1B | CHL | 609 |
| C | 0.332773  | 53.32 | 84.29 | 45.96 | C1C | CHL | 609 |
| C | 0.191076  | 53.39 | 87.55 | 43.05 | C1D | CHL | 609 |
| O | -0.589721 | 48.02 | 92.33 | 47.30 | O1A | CHL | 609 |
| O | -0.623224 | 55.01 | 92.59 | 44.60 | O1D | CHL | 609 |
| C | 0.037093  | 52.49 | 91.66 | 47.18 | C2A | CHL | 609 |
| C | 0.078577  | 52.87 | 86.32 | 50.27 | C2B | CHL | 609 |
| C | -0.147964 | 53.37 | 83.20 | 44.99 | C2C | CHL | 609 |
| C | 0.084438  | 53.27 | 88.53 | 41.97 | C2D | CHL | 609 |
| O | -0.485288 | 47.63 | 90.17 | 46.51 | O2A | CHL | 609 |
| O | -0.399841 | 53.49 | 94.19 | 43.91 | O2D | CHL | 609 |
| C | 0.179052  | 52.77 | 91.11 | 48.55 | C3A | CHL | 609 |
| C | -0.054715 | 52.83 | 85.06 | 49.73 | C3B | CHL | 609 |
| C | -0.234405 | 53.41 | 83.76 | 43.76 | C3C | CHL | 609 |
| C | -0.158062 | 53.19 | 89.74 | 42.61 | C3D | CHL | 609 |
| C | 0.345332  | 52.90 | 89.61 | 48.32 | C4A | CHL | 609 |
| C | 0.233194  | 53.01 | 85.21 | 48.29 | C4B | CHL | 609 |
| C | 0.342833  | 53.42 | 85.20 | 43.93 | C4C | CHL | 609 |
| C | 0.130108  | 53.21 | 89.48 | 44.02 | C4D | CHL | 609 |
| C | 0.345381  | 46.35 | 90.51 | 45.91 | C1  | CHL | 609 |
| C | -0.477083 | 46.12 | 89.63 | 44.80 | C2  | CHL | 609 |
| C | 0.260847  | 45.45 | 88.42 | 44.72 | C3  | CHL | 609 |
| C | -0.269607 | 44.74 | 87.68 | 45.89 | C4  | CHL | 609 |
| C | -0.336279 | 45.37 | 87.69 | 43.37 | C5  | CHL | 609 |
| C | 0.119257  | 44.46 | 88.25 | 42.27 | C6  | CHL | 609 |
| C | -0.175039 | 45.13 | 88.09 | 40.91 | C7  | CHL | 609 |
| C | 0.331362  | 44.39 | 88.49 | 39.64 | C8  | CHL | 609 |
| C | -0.313835 | 44.57 | 89.97 | 39.33 | C9  | CHL | 609 |
| C | -0.284648 | 44.84 | 87.71 | 38.42 | C10 | CHL | 609 |
| C | 0.041634  | 43.70 | 87.30 | 37.51 | C11 | CHL | 609 |
| C | -0.154439 | 44.29 | 87.38 | 36.12 | C12 | CHL | 609 |
| C | 0.196709  | 43.31 | 87.39 | 34.96 | C13 | CHL | 609 |
| C | -0.232704 | 43.43 | 88.68 | 34.16 | C14 | CHL | 609 |
| C | -0.201414 | 43.18 | 86.04 | 34.26 | C15 | CHL | 609 |
| C | 0.209589  | 43.59 | 85.81 | 32.80 | C16 | CHL | 609 |

|   |           |       |       |       |      |     |     |
|---|-----------|-------|-------|-------|------|-----|-----|
| C | -0.269983 | 42.80 | 84.68 | 32.14 | C17  | CHL | 609 |
| C | 0.432452  | 42.99 | 84.40 | 30.66 | C18  | CHL | 609 |
| C | -0.315373 | 42.00 | 83.33 | 30.26 | C19  | CHL | 609 |
| C | -0.315373 | 42.57 | 85.56 | 29.77 | C20  | CHL | 609 |
| H | 0.003832  | 50.94 | 92.89 | 46.55 | 1HAA | CHL | 609 |
| H | 0.003832  | 50.79 | 92.41 | 48.11 | 2HAA | CHL | 609 |
| H | 0.140703  | 52.24 | 84.28 | 51.61 | HAB  | CHL | 609 |
| H | -0.000428 | 53.70 | 83.61 | 41.69 | 1HAC | CHL | 609 |
| H | -0.000428 | 54.04 | 82.22 | 42.48 | 2HAC | CHL | 609 |
| H | 0.057072  | 50.11 | 90.89 | 45.79 | 1HBA | CHL | 609 |
| H | 0.057072  | 50.14 | 90.25 | 47.29 | 2HBA | CHL | 609 |
| H | 0.167066  | 52.94 | 82.35 | 49.55 | 1HBB | CHL | 609 |
| H | 0.167066  | 52.43 | 82.01 | 51.17 | 2HBB | CHL | 609 |
| H | 0.046995  | 52.03 | 81.98 | 41.22 | 1HBC | CHL | 609 |
| H | 0.046995  | 51.70 | 81.85 | 42.82 | 2HBC | CHL | 609 |
| H | 0.046995  | 51.37 | 83.24 | 42.03 | 3HBC | CHL | 609 |
| H | 0.218234  | 51.94 | 92.23 | 44.02 | HBD  | CHL | 609 |
| H | 0.063428  | 53.84 | 96.04 | 43.38 | 1HED | CHL | 609 |
| H | 0.063428  | 55.09 | 95.30 | 44.14 | 2HED | CHL | 609 |
| H | 0.063428  | 54.74 | 94.92 | 42.59 | 3HED | CHL | 609 |
| H | 0.175319  | 52.70 | 88.98 | 50.24 | HHB  | CHL | 609 |
| H | 0.209400  | 53.04 | 83.24 | 47.72 | HHC  | CHL | 609 |
| H | 0.200579  | 53.35 | 85.81 | 41.97 | HHD  | CHL | 609 |
| H | 0.104969  | 54.23 | 91.33 | 50.03 | 1HMA | CHL | 609 |
| H | 0.104969  | 54.83 | 91.47 | 48.51 | 2HMA | CHL | 609 |
| H | 0.104969  | 53.98 | 92.70 | 49.18 | 3HMA | CHL | 609 |
| H | 0.077125  | 52.87 | 86.01 | 52.35 | 1HMB | CHL | 609 |
| H | 0.077125  | 53.73 | 87.32 | 51.91 | 2HMB | CHL | 609 |
| H | 0.077125  | 52.10 | 87.39 | 51.91 | 3HMB | CHL | 609 |
| H | 0.021209  | 53.47 | 81.18 | 44.67 | HMC  | CHL | 609 |
| H | 0.090203  | 53.12 | 89.13 | 39.96 | 1HMD | CHL | 609 |
| H | 0.090203  | 54.04 | 87.79 | 40.15 | 2HMD | CHL | 609 |
| H | 0.090203  | 52.41 | 87.69 | 40.24 | 3HMD | CHL | 609 |
| H | 0.205820  | 46.51 | 89.95 | 43.94 | H2   | CHL | 609 |
| H | -0.019695 | 43.43 | 88.29 | 39.83 | H8   | CHL | 609 |
| H | 0.016242  | 46.36 | 91.45 | 45.58 | H11  | CHL | 609 |
| H | 0.016242  | 45.61 | 90.40 | 46.58 | H12  | CHL | 609 |
| H | -0.010572 | 42.37 | 87.45 | 35.30 | H13  | CHL | 609 |
| H | -0.061651 | 43.96 | 84.18 | 30.54 | H18  | CHL | 609 |
| H | 0.059830  | 53.02 | 92.47 | 46.90 | H2A  | CHL | 609 |
| H | 0.085694  | 44.34 | 86.83 | 45.55 | H41  | CHL | 609 |
| H | 0.085694  | 45.41 | 87.47 | 46.60 | H42  | CHL | 609 |
| H | 0.085694  | 44.02 | 88.26 | 46.27 | H43  | CHL | 609 |
| H | 0.032055  | 52.04 | 91.33 | 49.20 | H3A  | CHL | 609 |
| H | 0.096900  | 45.06 | 86.76 | 43.55 | H51  | CHL | 609 |
| H | 0.096900  | 46.29 | 87.67 | 42.99 | H52  | CHL | 609 |

|    |           |       |       |       |      |     |     |
|----|-----------|-------|-------|-------|------|-----|-----|
| H  | -0.002304 | 44.28 | 89.22 | 42.44 | H61  | CHL | 609 |
| H  | -0.002304 | 43.59 | 87.75 | 42.27 | H62  | CHL | 609 |
| H  | 0.027697  | 45.37 | 87.12 | 40.82 | H71  | CHL | 609 |
| H  | 0.027697  | 45.97 | 88.64 | 40.94 | H72  | CHL | 609 |
| H  | 0.069285  | 44.08 | 90.20 | 38.49 | H91  | CHL | 609 |
| H  | 0.069285  | 44.22 | 90.52 | 40.09 | H92  | CHL | 609 |
| H  | 0.069285  | 45.55 | 90.16 | 39.20 | H93  | CHL | 609 |
| H  | 0.073653  | 45.31 | 86.88 | 38.73 | 1H10 | CHL | 609 |
| H  | 0.073653  | 45.48 | 88.27 | 37.89 | 2H10 | CHL | 609 |
| H  | 0.015417  | 42.92 | 87.92 | 37.61 | 1H11 | CHL | 609 |
| H  | 0.015417  | 43.40 | 86.36 | 37.71 | 2H11 | CHL | 609 |
| H  | 0.036623  | 44.89 | 86.59 | 36.01 | 1H12 | CHL | 609 |
| H  | 0.036623  | 44.82 | 88.22 | 36.08 | 2H12 | CHL | 609 |
| H  | 0.048461  | 42.78 | 88.66 | 33.40 | 1H14 | CHL | 609 |
| H  | 0.048461  | 43.24 | 89.46 | 34.75 | 2H14 | CHL | 609 |
| H  | 0.048461  | 44.36 | 88.76 | 33.80 | 3H14 | CHL | 609 |
| H  | 0.037455  | 42.21 | 85.80 | 34.31 | 1H15 | CHL | 609 |
| H  | 0.037455  | 43.72 | 85.40 | 34.80 | 2H15 | CHL | 609 |
| H  | -0.021542 | 44.56 | 85.58 | 32.77 | 1H16 | CHL | 609 |
| H  | -0.021542 | 43.43 | 86.65 | 32.29 | 2H16 | CHL | 609 |
| H  | 0.043717  | 41.84 | 84.88 | 32.28 | 1H17 | CHL | 609 |
| H  | 0.043717  | 43.04 | 83.84 | 32.63 | 2H17 | CHL | 609 |
| H  | 0.058595  | 42.10 | 83.13 | 29.29 | 1H19 | CHL | 609 |
| H  | 0.058595  | 42.17 | 82.50 | 30.79 | 2H19 | CHL | 609 |
| H  | 0.058595  | 41.07 | 83.66 | 30.44 | 3H19 | CHL | 609 |
| H  | 0.058595  | 42.71 | 85.31 | 28.81 | 1H20 | CHL | 609 |
| H  | 0.058595  | 41.60 | 85.75 | 29.92 | 2H20 | CHL | 609 |
| H  | 0.058595  | 43.11 | 86.37 | 29.99 | 3H20 | CHL | 609 |
| Mg | 0.988885  | 66.88 | 90.75 | 36.64 | MG   | CLA | 610 |
| C  | -0.248758 | 68.88 | 92.37 | 39.03 | CHA  | CLA | 610 |
| C  | -0.093585 | 68.55 | 92.48 | 34.16 | CHB  | CLA | 610 |
| C  | -0.014122 | 65.56 | 88.58 | 34.33 | CHC  | CLA | 610 |
| C  | -0.320450 | 65.49 | 88.90 | 39.22 | CHD  | CLA | 610 |
| N  | -0.471184 | 68.41 | 92.29 | 36.60 | NA   | CLA | 610 |
| C  | 0.284481  | 69.17 | 92.73 | 37.69 | C1A  | CLA | 610 |
| C  | -0.124913 | 70.29 | 93.61 | 37.18 | C2A  | CLA | 610 |
| C  | 0.095258  | 69.81 | 94.02 | 35.81 | C3A  | CLA | 610 |
| C  | 0.037815  | 68.84 | 92.91 | 35.45 | C4A  | CLA | 610 |
| C  | -0.328981 | 69.06 | 95.38 | 35.81 | CMA  | CLA | 610 |
| C  | 0.317603  | 71.65 | 92.88 | 37.14 | CAA  | CLA | 610 |
| C  | -0.161281 | 71.89 | 91.44 | 36.59 | CBA  | CLA | 610 |
| C  | 0.687537  | 71.93 | 91.24 | 35.05 | CGA  | CLA | 610 |
| O  | -0.542233 | 72.25 | 92.22 | 34.36 | O1A  | CLA | 610 |
| O  | -0.661682 | 71.60 | 89.97 | 34.38 | O2A  | CLA | 610 |
| N  | -0.250663 | 67.09 | 90.52 | 34.62 | NB   | CLA | 610 |
| C  | -0.107131 | 67.77 | 91.39 | 33.78 | C1B  | CLA | 610 |

|   |           |       |       |       |     |     |     |
|---|-----------|-------|-------|-------|-----|-----|-----|
| C | 0.072858  | 67.49 | 91.02 | 32.41 | C2B | CLA | 610 |
| C | 0.117795  | 66.73 | 89.88 | 32.43 | C3B | CLA | 610 |
| C | -0.155342 | 66.41 | 89.60 | 33.84 | C4B | CLA | 610 |
| C | -0.282443 | 68.01 | 91.86 | 31.22 | CMB | CLA | 610 |
| C | -0.254125 | 66.50 | 89.29 | 31.11 | CAB | CLA | 610 |
| C | -0.328350 | 65.79 | 88.20 | 30.87 | CBB | CLA | 610 |
| N | -0.365548 | 65.68 | 89.06 | 36.77 | NC  | CLA | 610 |
| C | -0.059640 | 65.23 | 88.33 | 35.69 | C1C | CLA | 610 |
| C | 0.201507  | 64.36 | 87.26 | 36.19 | C2C | CLA | 610 |
| C | -0.316570 | 64.41 | 87.31 | 37.55 | C3C | CLA | 610 |
| C | 0.186797  | 65.20 | 88.46 | 37.92 | C4C | CLA | 610 |
| C | -0.453747 | 63.57 | 86.21 | 35.41 | CMC | CLA | 610 |
| C | 0.324955  | 63.74 | 86.34 | 38.57 | CAC | CLA | 610 |
| C | 0.015876  | 64.63 | 85.12 | 38.86 | CBC | CLA | 610 |
| N | -0.833487 | 66.92 | 90.80 | 38.66 | ND  | CLA | 610 |
| C | 0.321441  | 66.30 | 89.99 | 39.59 | C1D | CLA | 610 |
| C | 0.037327  | 66.67 | 90.39 | 40.95 | C2D | CLA | 610 |
| C | -0.266963 | 67.64 | 91.34 | 40.79 | C3D | CLA | 610 |
| C | 0.492494  | 67.83 | 91.53 | 39.38 | C4D | CLA | 610 |
| C | -0.291118 | 66.09 | 89.86 | 42.26 | CMD | CLA | 610 |
| C | 0.601942  | 68.57 | 92.23 | 41.45 | CAD | CLA | 610 |
| O | -0.445079 | 68.66 | 92.57 | 42.63 | OBD | CLA | 610 |
| C | -0.579060 | 69.53 | 92.79 | 40.35 | CBD | CLA | 610 |
| C | 0.766237  | 69.67 | 94.33 | 40.49 | CGD | CLA | 610 |
| O | -0.516295 | 68.72 | 95.10 | 40.32 | O1D | CLA | 610 |
| O | -0.402165 | 71.01 | 94.75 | 40.78 | O2D | CLA | 610 |
| C | 0.036010  | 71.31 | 95.99 | 41.35 | CED | CLA | 610 |
| C | 1.199790  | 71.23 | 90.05 | 32.97 | C1  | CLA | 610 |
| C | -0.878268 | 70.63 | 88.78 | 32.56 | C2  | CLA | 610 |
| C | 0.309015  | 71.23 | 87.74 | 31.84 | C3  | CLA | 610 |
| C | -0.405165 | 72.71 | 87.73 | 31.35 | C4  | CLA | 610 |
| C | -0.324908 | 70.42 | 86.50 | 31.43 | C5  | CLA | 610 |
| C | 0.274037  | 70.67 | 85.23 | 32.23 | C6  | CLA | 610 |
| C | -0.101500 | 70.10 | 83.96 | 31.59 | C7  | CLA | 610 |
| C | 0.417045  | 70.05 | 82.76 | 32.54 | C8  | CLA | 610 |
| C | -0.389623 | 71.39 | 82.04 | 32.71 | C9  | CLA | 610 |
| C | -0.365008 | 68.94 | 81.75 | 32.26 | C10 | CLA | 610 |
| C | 0.506051  | 68.29 | 81.32 | 33.57 | C11 | CLA | 610 |
| C | -0.389841 | 67.53 | 80.00 | 33.40 | C12 | CLA | 610 |
| C | 0.381461  | 67.08 | 79.18 | 34.61 | C13 | CLA | 610 |
| C | -0.086919 | 66.27 | 79.92 | 35.67 | C14 | CLA | 610 |
| C | -0.231164 | 68.15 | 78.16 | 35.00 | C15 | CLA | 610 |
| C | 0.194682  | 68.05 | 77.35 | 36.28 | C16 | CLA | 610 |
| C | -0.204822 | 69.27 | 76.54 | 36.71 | C17 | CLA | 610 |
| C | 0.444563  | 69.05 | 75.59 | 37.89 | C18 | CLA | 610 |
| C | -0.424301 | 70.22 | 74.61 | 37.96 | C19 | CLA | 610 |

|   |           |       |       |       |      |     |     |
|---|-----------|-------|-------|-------|------|-----|-----|
| C | -0.349598 | 68.85 | 76.24 | 39.26 | C20  | CLA | 610 |
| H | 0.128998  | 68.95 | 93.02 | 33.42 | HHB  | CLA | 610 |
| H | 0.147395  | 65.14 | 87.98 | 33.65 | HHC  | CLA | 610 |
| H | 0.162465  | 65.08 | 88.38 | 39.97 | HHD  | CLA | 610 |
| H | 0.091350  | 70.44 | 94.41 | 37.76 | H2A  | CLA | 610 |
| H | 0.080596  | 70.58 | 94.12 | 35.18 | H3A  | CLA | 610 |
| H | 0.078073  | 68.77 | 95.59 | 34.87 | 1HMA | CLA | 610 |
| H | 0.084566  | 68.27 | 95.32 | 36.40 | 2HMA | CLA | 610 |
| H | 0.106282  | 69.68 | 96.09 | 36.13 | 3HMA | CLA | 610 |
| H | -0.076675 | 71.97 | 92.85 | 38.09 | 1HAA | CLA | 610 |
| H | -0.068696 | 72.26 | 93.46 | 36.60 | 2HAA | CLA | 610 |
| H | 0.084108  | 72.76 | 91.12 | 36.95 | 1HBA | CLA | 610 |
| H | 0.063653  | 71.15 | 90.86 | 36.94 | 2HBA | CLA | 610 |
| H | 0.066027  | 67.71 | 91.44 | 30.36 | 1HMB | CLA | 610 |
| H | 0.088663  | 67.65 | 92.79 | 31.29 | 2HMB | CLA | 610 |
| H | 0.126583  | 69.01 | 91.89 | 31.25 | 3HMB | CLA | 610 |
| H | 0.199497  | 66.92 | 89.76 | 30.33 | HAB  | CLA | 610 |
| H | 0.168135  | 65.36 | 87.71 | 31.62 | 1HBB | CLA | 610 |
| H | 0.167559  | 65.69 | 87.87 | 29.93 | 2HBB | CLA | 610 |
| H | 0.156307  | 63.07 | 85.62 | 36.05 | 1HMC | CLA | 610 |
| H | 0.094565  | 62.92 | 86.66 | 34.80 | 2HMC | CLA | 610 |
| H | 0.181014  | 64.20 | 85.65 | 34.87 | 3HMC | CLA | 610 |
| H | -0.086504 | 63.56 | 86.82 | 39.42 | 1HAC | CLA | 610 |
| H | -0.058919 | 62.87 | 86.01 | 38.19 | 2HAC | CLA | 610 |
| H | -0.033765 | 64.17 | 84.52 | 39.51 | 1HBC | CLA | 610 |
| H | 0.004739  | 64.80 | 84.63 | 38.01 | 2HBC | CLA | 610 |
| H | 0.030974  | 65.50 | 85.44 | 39.24 | 3HBC | CLA | 610 |
| H | 0.129643  | 66.54 | 90.32 | 43.03 | 1HMD | CLA | 610 |
| H | 0.067407  | 65.11 | 90.04 | 42.29 | 2HMD | CLA | 610 |
| H | 0.146968  | 66.26 | 88.87 | 42.32 | 3HMD | CLA | 610 |
| H | 0.252505  | 70.47 | 92.45 | 40.40 | HBD  | CLA | 610 |
| H | 0.093995  | 72.30 | 96.07 | 41.47 | 1HED | CLA | 610 |
| H | 0.051124  | 70.99 | 96.72 | 40.74 | 2HED | CLA | 610 |
| H | 0.071934  | 70.86 | 96.07 | 42.24 | 3HED | CLA | 610 |
| H | -0.162848 | 72.05 | 90.22 | 32.42 | H11  | CLA | 610 |
| H | -0.292171 | 70.58 | 90.79 | 32.83 | H12  | CLA | 610 |
| H | 0.331312  | 69.68 | 88.64 | 32.82 | H2   | CLA | 610 |
| H | 0.136201  | 72.89 | 86.88 | 30.86 | H41  | CLA | 610 |
| H | 0.119462  | 72.86 | 88.51 | 30.73 | H42  | CLA | 610 |
| H | 0.135922  | 73.32 | 87.81 | 32.13 | H43  | CLA | 610 |
| H | 0.091426  | 70.63 | 86.30 | 30.47 | H51  | CLA | 610 |
| H | 0.081966  | 69.44 | 86.72 | 31.51 | H52  | CLA | 610 |
| H | -0.042398 | 70.24 | 85.33 | 33.13 | H61  | CLA | 610 |
| H | -0.050036 | 71.65 | 85.11 | 32.34 | H62  | CLA | 610 |
| H | -0.004755 | 70.68 | 83.72 | 30.81 | H71  | CLA | 610 |
| H | -0.001033 | 69.17 | 84.15 | 31.28 | H72  | CLA | 610 |



|    |           |       |       |       |      |     |     |
|----|-----------|-------|-------|-------|------|-----|-----|
| H  | -0.115353 | 69.82 | 83.19 | 33.41 | H8   | CLA | 610 |
| H  | 0.100111  | 71.28 | 81.27 | 33.34 | H91  | CLA | 610 |
| H  | 0.092151  | 71.70 | 81.70 | 31.82 | H92  | CLA | 610 |
| H  | 0.068924  | 72.07 | 82.67 | 33.08 | H93  | CLA | 610 |
| H  | 0.069029  | 69.32 | 80.95 | 31.80 | 1H10 | CLA | 610 |
| H  | 0.061629  | 68.25 | 82.18 | 31.67 | 2H10 | CLA | 610 |
| H  | -0.111606 | 67.65 | 82.03 | 33.86 | 1H11 | CLA | 610 |
| H  | -0.112571 | 69.00 | 81.20 | 34.26 | 2H11 | CLA | 610 |
| H  | 0.066443  | 68.12 | 79.40 | 32.86 | 1H12 | CLA | 610 |
| H  | 0.053647  | 66.70 | 80.21 | 32.88 | 2H12 | CLA | 610 |
| H  | -0.064459 | 66.31 | 78.60 | 34.35 | H13  | CLA | 610 |
| H  | 0.001093  | 66.03 | 79.28 | 36.41 | 1H14 | CLA | 610 |
| H  | -0.043936 | 66.81 | 80.67 | 36.04 | 2H14 | CLA | 610 |
| H  | 0.010206  | 65.43 | 80.28 | 35.26 | 3H14 | CLA | 610 |
| H  | 0.024125  | 69.01 | 78.66 | 35.05 | 1H15 | CLA | 610 |
| H  | 0.050903  | 68.19 | 77.50 | 34.25 | 2H15 | CLA | 610 |
| H  | -0.039279 | 67.29 | 76.70 | 36.17 | 1H16 | CLA | 610 |
| H  | -0.027613 | 67.84 | 77.99 | 37.02 | 2H16 | CLA | 610 |
| H  | 0.020039  | 69.99 | 77.19 | 36.96 | 1H17 | CLA | 610 |
| H  | 0.038779  | 69.57 | 76.00 | 35.92 | 2H17 | CLA | 610 |
| H  | -0.074994 | 68.19 | 75.13 | 37.69 | H18  | CLA | 610 |
| H  | 0.099281  | 70.09 | 73.98 | 38.73 | 1H19 | CLA | 610 |
| H  | 0.091432  | 70.27 | 74.09 | 37.11 | 2H19 | CLA | 610 |
| H  | 0.094621  | 71.07 | 75.12 | 38.09 | 3H19 | CLA | 610 |
| H  | 0.087563  | 68.72 | 75.52 | 39.95 | 1H20 | CLA | 610 |
| H  | 0.075366  | 69.66 | 76.78 | 39.49 | 2H20 | CLA | 610 |
| H  | 0.053427  | 68.05 | 76.83 | 39.24 | 3H20 | CLA | 610 |
| Mg | 1.342619  | 63.85 | 94.97 | 19.32 | MG   | CLA | 611 |
| C  | 0.087461  | 66.26 | 95.15 | 21.87 | CHA  | CLA | 611 |
| C  | -0.575487 | 66.01 | 96.69 | 17.24 | CHB  | CLA | 611 |
| C  | -0.318916 | 61.85 | 94.17 | 16.66 | CHC  | CLA | 611 |
| C  | -0.502407 | 62.09 | 92.67 | 21.28 | CHD  | CLA | 611 |
| N  | -0.737527 | 65.83 | 95.86 | 19.55 | NA   | CLA | 611 |
| C  | 0.066774  | 66.64 | 95.81 | 20.67 | C1A  | CLA | 611 |
| C  | 0.317943  | 67.99 | 96.45 | 20.37 | C2A  | CLA | 611 |
| C  | -0.017837 | 67.74 | 97.20 | 19.10 | C3A  | CLA | 611 |
| C  | 0.468831  | 66.47 | 96.57 | 18.55 | C4A  | CLA | 611 |
| C  | -0.403505 | 67.58 | 98.70 | 19.41 | CMA  | CLA | 611 |
| C  | -0.100557 | 69.17 | 95.62 | 19.87 | CAA  | CLA | 611 |
| C  | 0.014388  | 69.48 | 94.18 | 20.21 | CBA  | CLA | 611 |
| C  | 0.618203  | 70.09 | 93.17 | 19.26 | CGA  | CLA | 611 |
| O  | -0.511748 | 71.09 | 93.47 | 18.60 | O1A  | CLA | 611 |
| O  | -0.451026 | 69.53 | 91.85 | 19.08 | O2A  | CLA | 611 |
| N  | -0.716056 | 63.87 | 95.44 | 17.34 | NB   | CLA | 611 |
| C  | 0.281630  | 64.84 | 96.17 | 16.68 | C1B  | CLA | 611 |
| C  | 0.141051  | 64.51 | 96.25 | 15.28 | C2B  | CLA | 611 |

|   |           |       |       |       |     |     |     |
|---|-----------|-------|-------|-------|-----|-----|-----|
| C | -0.252949 | 63.35 | 95.54 | 15.09 | C3B | CLA | 611 |
| C | 0.412461  | 62.94 | 95.02 | 16.40 | C4B | CLA | 611 |
| C | -0.344417 | 65.40 | 96.99 | 14.25 | CMB | CLA | 611 |
| C | -0.011389 | 62.85 | 95.51 | 13.72 | CAB | CLA | 611 |
| C | -0.454523 | 61.88 | 94.66 | 13.27 | CBB | CLA | 611 |
| N | -0.707764 | 62.19 | 93.72 | 19.06 | NC  | CLA | 611 |
| C | 0.213139  | 61.50 | 93.57 | 17.88 | C1C | CLA | 611 |
| C | 0.200428  | 60.38 | 92.68 | 18.09 | C2C | CLA | 611 |
| C | -0.353579 | 60.46 | 92.23 | 19.38 | C3C | CLA | 611 |
| C | 0.489722  | 61.62 | 92.86 | 19.97 | C4C | CLA | 611 |
| C | -0.452389 | 59.34 | 92.24 | 17.05 | CMC | CLA | 611 |
| C | 0.157503  | 59.45 | 91.30 | 20.09 | CAC | CLA | 611 |
| C | -0.220205 | 59.77 | 89.81 | 19.96 | CBC | CLA | 611 |
| N | -0.640163 | 64.00 | 94.21 | 21.19 | ND  | CLA | 611 |
| C | 0.347504  | 63.20 | 93.30 | 21.87 | C1D | CLA | 611 |
| C | 0.129357  | 63.74 | 93.04 | 23.20 | C2D | CLA | 611 |
| C | -0.286759 | 64.90 | 93.77 | 23.27 | C3D | CLA | 611 |
| C | 0.207445  | 65.07 | 94.44 | 22.01 | C4D | CLA | 611 |
| C | -0.347760 | 63.15 | 92.10 | 24.25 | CMD | CLA | 611 |
| C | 0.666102  | 66.07 | 94.11 | 24.07 | CAD | CLA | 611 |
| O | -0.514954 | 66.42 | 93.73 | 25.19 | OBD | CLA | 611 |
| C | -0.545725 | 66.97 | 95.07 | 23.22 | CBD | CLA | 611 |
| C | 0.776027  | 67.07 | 96.45 | 23.93 | CGD | CLA | 611 |
| O | -0.506632 | 66.15 | 97.27 | 23.87 | O1D | CLA | 611 |
| O | -0.432965 | 68.25 | 96.65 | 24.71 | O2D | CLA | 611 |
| C | 0.117631  | 68.45 | 97.83 | 25.44 | CED | CLA | 611 |
| C | 0.375242  | 70.37 | 90.74 | 19.49 | C1  | CLA | 611 |
| C | -0.489743 | 69.53 | 89.67 | 19.97 | C2  | CLA | 611 |
| C | 0.222476  | 68.73 | 88.72 | 19.33 | C3  | CLA | 611 |
| C | -0.347416 | 68.54 | 88.58 | 17.81 | C4  | CLA | 611 |
| C | -0.289548 | 67.89 | 87.69 | 20.10 | C5  | CLA | 611 |
| C | 0.243217  | 68.71 | 86.62 | 20.81 | C6  | CLA | 611 |
| C | -0.482513 | 68.52 | 86.72 | 22.32 | C7  | CLA | 611 |
| C | 0.408378  | 68.09 | 85.50 | 23.15 | C8  | CLA | 611 |
| C | -0.445179 | 69.18 | 85.07 | 24.12 | C9  | CLA | 611 |
| C | 0.015317  | 67.24 | 84.43 | 22.45 | C10 | CLA | 611 |
| C | 0.072899  | 66.74 | 83.20 | 23.17 | C11 | CLA | 611 |
| C | -0.259841 | 66.80 | 82.01 | 22.22 | C12 | CLA | 611 |
| C | 0.357243  | 65.58 | 81.11 | 22.01 | C13 | CLA | 611 |
| C | -0.524289 | 64.75 | 81.61 | 20.83 | C14 | CLA | 611 |
| C | -0.104346 | 64.75 | 80.65 | 23.23 | C15 | CLA | 611 |
| C | 0.075153  | 65.33 | 79.69 | 24.27 | C16 | CLA | 611 |
| C | -0.129706 | 64.84 | 78.24 | 24.20 | C17 | CLA | 611 |
| C | 0.389800  | 64.74 | 77.50 | 25.53 | C18 | CLA | 611 |
| C | -0.407579 | 63.47 | 76.67 | 25.57 | C19 | CLA | 611 |
| C | -0.408977 | 65.90 | 76.54 | 25.72 | C20 | CLA | 611 |

|   |           |       |       |       |      |     |     |
|---|-----------|-------|-------|-------|------|-----|-----|
| H | 0.189702  | 66.60 | 97.22 | 16.62 | HHB  | CLA | 611 |
| H | 0.164262  | 61.25 | 93.97 | 15.88 | HHC  | CLA | 611 |
| H | 0.239495  | 61.59 | 92.03 | 21.85 | HHD  | CLA | 611 |
| H | -0.023921 | 68.23 | 96.88 | 21.24 | H2A  | CLA | 611 |
| H | 0.052651  | 68.49 | 97.13 | 18.45 | H3A  | CLA | 611 |
| H | 0.111257  | 67.41 | 99.20 | 18.56 | 1HMA | CLA | 611 |
| H | 0.081420  | 66.81 | 98.83 | 20.03 | 2HMA | CLA | 611 |
| H | 0.114998  | 68.41 | 99.04 | 19.84 | 3HMA | CLA | 611 |
| H | 0.003768  | 69.99 | 96.12 | 20.14 | 1HAA | CLA | 611 |
| H | 0.013821  | 69.10 | 95.62 | 18.87 | 2HAA | CLA | 611 |
| H | 0.061180  | 70.10 | 94.22 | 21.00 | 1HBA | CLA | 611 |
| H | -0.019213 | 68.60 | 93.79 | 20.50 | 2HBA | CLA | 611 |
| H | 0.104809  | 64.99 | 96.93 | 13.34 | 1HMB | CLA | 611 |
| H | 0.090777  | 65.48 | 97.95 | 14.51 | 2HMB | CLA | 611 |
| H | 0.104150  | 66.31 | 96.57 | 14.24 | 3HMB | CLA | 611 |
| H | 0.121208  | 63.24 | 96.16 | 13.07 | HAB  | CLA | 611 |
| H | 0.196789  | 61.46 | 94.00 | 13.89 | 1HBB | CLA | 611 |
| H | 0.164693  | 61.58 | 94.70 | 12.31 | 2HBB | CLA | 611 |
| H | 0.175218  | 58.68 | 91.62 | 17.48 | 1HMC | CLA | 611 |
| H | 0.140939  | 58.86 | 93.05 | 16.70 | 2HMC | CLA | 611 |
| H | 0.110110  | 59.80 | 91.77 | 16.30 | 3HMC | CLA | 611 |
| H | -0.014721 | 59.44 | 91.52 | 21.07 | 1HAC | CLA | 611 |
| H | 0.029755  | 58.54 | 91.45 | 19.70 | 2HAC | CLA | 611 |
| H | 0.064761  | 59.08 | 89.27 | 20.44 | 1HBC | CLA | 611 |
| H | 0.067532  | 59.77 | 89.56 | 18.99 | 2HBC | CLA | 611 |
| H | 0.051630  | 60.67 | 89.63 | 20.35 | 3HBC | CLA | 611 |
| H | 0.139725  | 63.71 | 92.11 | 25.07 | 1HMD | CLA | 611 |
| H | 0.130465  | 62.22 | 92.40 | 24.48 | 2HMD | CLA | 611 |
| H | 0.106866  | 63.12 | 91.17 | 23.88 | 3HMD | CLA | 611 |
| H | 0.174838  | 67.91 | 94.75 | 23.10 | HBD  | CLA | 611 |
| H | 0.070035  | 69.32 | 97.78 | 25.92 | 1HED | CLA | 611 |
| H | 0.023578  | 68.45 | 98.61 | 24.81 | 2HED | CLA | 611 |
| H | 0.027910  | 67.71 | 97.93 | 26.10 | 3HED | CLA | 611 |
| H | 0.007440  | 71.00 | 91.03 | 20.21 | H11  | CLA | 611 |
| H | 0.003476  | 70.91 | 90.41 | 18.70 | H12  | CLA | 611 |
| H | 0.190987  | 69.51 | 89.59 | 20.97 | H2   | CLA | 611 |
| H | 0.090291  | 67.92 | 87.82 | 17.63 | H41  | CLA | 611 |
| H | 0.121102  | 68.16 | 89.42 | 17.44 | H42  | CLA | 611 |
| H | 0.112963  | 69.43 | 88.39 | 17.39 | H43  | CLA | 611 |
| H | 0.106873  | 67.28 | 87.23 | 19.45 | H51  | CLA | 611 |
| H | 0.083896  | 67.35 | 88.17 | 20.79 | H52  | CLA | 611 |
| H | -0.038091 | 69.68 | 86.75 | 20.59 | H61  | CLA | 611 |
| H | -0.040967 | 68.41 | 85.72 | 20.50 | H62  | CLA | 611 |
| H | 0.129647  | 67.82 | 87.42 | 22.47 | H71  | CLA | 611 |
| H | 0.114607  | 69.39 | 87.02 | 22.70 | H72  | CLA | 611 |
| H | -0.087041 | 67.35 | 85.82 | 23.75 | H8   | CLA | 611 |

|    |           |       |       |       |      |     |     |
|----|-----------|-------|-------|-------|------|-----|-----|
| H  | 0.112295  | 68.87 | 84.27 | 24.64 | H91  | CLA | 611 |
| H  | 0.076715  | 70.01 | 84.83 | 23.60 | H92  | CLA | 611 |
| H  | 0.102338  | 69.39 | 85.82 | 24.74 | H93  | CLA | 611 |
| H  | -0.025597 | 67.78 | 84.09 | 21.68 | 1H10 | CLA | 611 |
| H  | 0.014503  | 66.42 | 84.89 | 22.10 | 2H10 | CLA | 611 |
| H  | -0.003178 | 65.80 | 83.35 | 23.47 | 1H11 | CLA | 611 |
| H  | -0.023552 | 67.32 | 83.03 | 23.97 | 2H11 | CLA | 611 |
| H  | 0.058316  | 67.54 | 81.42 | 22.54 | 1H12 | CLA | 611 |
| H  | 0.043866  | 67.05 | 82.38 | 21.32 | 2H12 | CLA | 611 |
| H  | -0.056546 | 65.98 | 80.23 | 21.78 | H13  | CLA | 611 |
| H  | 0.121422  | 63.95 | 81.02 | 20.71 | 1H14 | CLA | 611 |
| H  | 0.120582  | 64.44 | 82.54 | 21.02 | 2H14 | CLA | 611 |
| H  | 0.130739  | 65.30 | 81.60 | 20.00 | 3H14 | CLA | 611 |
| H  | 0.015972  | 63.93 | 80.21 | 22.86 | 1H15 | CLA | 611 |
| H  | 0.008955  | 64.49 | 81.48 | 23.72 | 2H15 | CLA | 611 |
| H  | -0.013331 | 65.09 | 80.04 | 25.18 | 1H16 | CLA | 611 |
| H  | -0.010767 | 66.32 | 79.68 | 24.16 | 2H16 | CLA | 611 |
| H  | 0.020869  | 65.48 | 77.73 | 23.62 | 1H17 | CLA | 611 |
| H  | 0.020201  | 63.94 | 78.24 | 23.78 | 2H17 | CLA | 611 |
| H  | -0.050739 | 64.74 | 78.19 | 26.26 | H18  | CLA | 611 |
| H  | 0.097982  | 63.41 | 76.19 | 26.45 | 1H19 | CLA | 611 |
| H  | 0.083816  | 62.68 | 77.27 | 25.46 | 2H19 | CLA | 611 |
| H  | 0.100471  | 63.48 | 76.00 | 24.83 | 3H19 | CLA | 611 |
| H  | 0.095762  | 65.81 | 76.07 | 26.60 | 1H20 | CLA | 611 |
| H  | 0.107142  | 65.90 | 75.87 | 24.98 | 2H20 | CLA | 611 |
| H  | 0.066524  | 66.76 | 77.05 | 25.70 | 3H20 | CLA | 611 |
| Mg | 1.343183  | 65.88 | 87.59 | 25.37 | MG   | CLA | 612 |
| C  | -0.093872 | 68.37 | 90.05 | 25.04 | CHA  | CLA | 612 |
| C  | -0.540529 | 67.80 | 86.13 | 27.90 | CHB  | CLA | 612 |
| C  | -0.329536 | 64.01 | 84.70 | 25.16 | CHC  | CLA | 612 |
| C  | -0.449269 | 64.60 | 88.59 | 22.31 | CHD  | CLA | 612 |
| N  | -0.540340 | 67.76 | 88.11 | 26.44 | NA   | CLA | 612 |
| C  | -0.067258 | 68.59 | 89.19 | 26.16 | C1A  | CLA | 612 |
| C  | 0.412566  | 69.73 | 89.25 | 27.16 | C2A  | CLA | 612 |
| C  | -0.064845 | 69.64 | 87.94 | 27.90 | C3A  | CLA | 612 |
| C  | 0.330603  | 68.32 | 87.34 | 27.44 | C4A  | CLA | 612 |
| C  | -0.245494 | 70.87 | 87.09 | 27.56 | CMA  | CLA | 612 |
| C  | -0.019159 | 69.77 | 90.42 | 28.14 | CAA  | CLA | 612 |
| C  | -0.313079 | 70.98 | 90.64 | 29.06 | CBA  | CLA | 612 |
| C  | 0.711499  | 72.32 | 90.85 | 28.38 | CGA  | CLA | 612 |
| O  | -0.512712 | 72.56 | 91.93 | 27.85 | O1A  | CLA | 612 |
| O  | -0.571616 | 73.35 | 89.84 | 28.36 | O2A  | CLA | 612 |
| N  | -0.720294 | 65.78 | 85.82 | 26.48 | NB   | CLA | 612 |
| C  | 0.443415  | 66.66 | 85.43 | 27.47 | C1B  | CLA | 612 |
| C  | 0.000977  | 66.31 | 84.10 | 27.90 | C2B  | CLA | 612 |
| C  | -0.004004 | 65.25 | 83.68 | 27.15 | C3B  | CLA | 612 |

|   |           |       |       |       |     |     |     |
|---|-----------|-------|-------|-------|-----|-----|-----|
| C | 0.274585  | 64.94 | 84.76 | 26.22 | C4B | CLA | 612 |
| C | -0.279911 | 67.09 | 83.38 | 29.04 | CMB | CLA | 612 |
| C | -0.130003 | 64.74 | 82.35 | 27.47 | CAB | CLA | 612 |
| C | -0.416041 | 63.58 | 81.83 | 26.99 | CBB | CLA | 612 |
| N | -0.681351 | 64.43 | 86.88 | 24.06 | NC  | CLA | 612 |
| C | 0.212990  | 63.77 | 85.67 | 24.17 | C1C | CLA | 612 |
| C | 0.167467  | 62.86 | 85.52 | 23.05 | C2C | CLA | 612 |
| C | -0.312054 | 63.04 | 86.59 | 22.23 | C3C | CLA | 612 |
| C | 0.414235  | 64.05 | 87.43 | 22.85 | C4C | CLA | 612 |
| C | -0.464362 | 61.97 | 84.30 | 22.71 | CMC | CLA | 612 |
| C | 0.203082  | 62.34 | 86.91 | 20.90 | CAC | CLA | 612 |
| C | -0.223703 | 63.12 | 86.39 | 19.70 | CBC | CLA | 612 |
| N | -0.637089 | 66.22 | 89.09 | 24.08 | ND  | CLA | 612 |
| C | 0.265568  | 65.62 | 89.37 | 22.86 | C1D | CLA | 612 |
| C | 0.156923  | 66.33 | 90.44 | 22.18 | C2D | CLA | 612 |
| C | -0.300772 | 67.36 | 90.78 | 23.01 | C3D | CLA | 612 |
| C | 0.239774  | 67.32 | 89.90 | 24.14 | C4D | CLA | 612 |
| C | -0.383548 | 66.00 | 91.02 | 20.81 | CMD | CLA | 612 |
| C | 0.648522  | 68.48 | 91.66 | 23.22 | CAD | CLA | 612 |
| O | -0.533693 | 68.90 | 92.58 | 22.54 | OBD | CLA | 612 |
| C | -0.492649 | 69.17 | 91.27 | 24.54 | CBD | CLA | 612 |
| C | 0.685942  | 70.66 | 90.93 | 24.27 | CGD | CLA | 612 |
| O | -0.485170 | 71.52 | 91.52 | 24.93 | O1D | CLA | 612 |
| O | -0.402315 | 70.96 | 90.05 | 23.18 | O2D | CLA | 612 |
| C | 0.117167  | 71.91 | 89.06 | 23.23 | CED | CLA | 612 |
| C | 0.758091  | 73.91 | 89.50 | 27.05 | C1  | CLA | 612 |
| C | -0.579598 | 74.79 | 88.35 | 27.21 | C2  | CLA | 612 |
| C | 0.212309  | 75.21 | 87.33 | 26.35 | C3  | CLA | 612 |
| C | -0.339460 | 74.83 | 87.13 | 24.86 | C4  | CLA | 612 |
| C | -0.156926 | 76.14 | 86.19 | 26.84 | C5  | CLA | 612 |
| C | 0.136251  | 75.61 | 85.34 | 28.00 | C6  | CLA | 612 |
| C | -0.229782 | 74.74 | 84.17 | 27.53 | C7  | CLA | 612 |
| C | 0.453669  | 73.47 | 83.81 | 28.31 | C8  | CLA | 612 |
| C | -0.365079 | 73.73 | 83.40 | 29.75 | C9  | CLA | 612 |
| C | -0.228426 | 72.69 | 82.66 | 27.67 | C10 | CLA | 612 |
| C | -0.047505 | 71.81 | 82.91 | 26.45 | C11 | CLA | 612 |
| C | -0.075127 | 70.41 | 82.45 | 26.87 | C12 | CLA | 612 |
| C | 0.371202  | 69.86 | 81.06 | 26.54 | C13 | CLA | 612 |
| C | -0.294104 | 68.75 | 81.18 | 25.51 | C14 | CLA | 612 |
| C | -0.123006 | 69.54 | 80.27 | 27.82 | C15 | CLA | 612 |
| C | 0.258295  | 68.57 | 79.09 | 27.97 | C16 | CLA | 612 |
| C | -0.188068 | 68.89 | 78.31 | 29.24 | C17 | CLA | 612 |
| C | 0.494189  | 68.18 | 76.98 | 29.47 | C18 | CLA | 612 |
| C | -0.458069 | 68.79 | 75.84 | 28.66 | C19 | CLA | 612 |
| C | -0.417946 | 68.21 | 76.61 | 30.95 | C20 | CLA | 612 |
| H | 0.206689  | 68.31 | 85.70 | 28.64 | HHB | CLA | 612 |

|   |           |       |       |       |      |     |     |
|---|-----------|-------|-------|-------|------|-----|-----|
| H | 0.158986  | 63.45 | 83.87 | 25.12 | HHC  | CLA | 612 |
| H | 0.221184  | 64.23 | 88.90 | 21.43 | HHD  | CLA | 612 |
| H | 0.005830  | 70.59 | 89.38 | 26.65 | H2A  | CLA | 612 |
| H | 0.067697  | 69.64 | 88.03 | 28.90 | H3A  | CLA | 612 |
| H | 0.069477  | 70.82 | 86.22 | 28.05 | 1HMA | CLA | 612 |
| H | 0.101359  | 70.90 | 86.92 | 26.57 | 2HMA | CLA | 612 |
| H | 0.045775  | 71.70 | 87.57 | 27.84 | 3HMA | CLA | 612 |
| H | 0.032093  | 68.97 | 90.31 | 28.73 | 1HAA | CLA | 612 |
| H | -0.014187 | 69.67 | 91.25 | 27.59 | 2HAA | CLA | 612 |
| H | 0.138895  | 70.80 | 91.44 | 29.62 | 1HBA | CLA | 612 |
| H | 0.074914  | 71.07 | 89.83 | 29.64 | 2HBA | CLA | 612 |
| H | 0.127319  | 66.69 | 82.47 | 29.19 | 1HMB | CLA | 612 |
| H | 0.035260  | 68.05 | 83.29 | 28.78 | 2HMB | CLA | 612 |
| H | 0.141606  | 67.01 | 83.91 | 29.88 | 3HMB | CLA | 612 |
| H | 0.204367  | 65.29 | 81.79 | 28.09 | HAB  | CLA | 612 |
| H | 0.169492  | 63.00 | 82.36 | 26.37 | 1HBB | CLA | 612 |
| H | 0.173222  | 63.30 | 80.91 | 27.26 | 2HBB | CLA | 612 |
| H | 0.183690  | 61.46 | 84.49 | 21.87 | 1HMC | CLA | 612 |
| H | 0.126563  | 62.55 | 83.50 | 22.58 | 2HMC | CLA | 612 |
| H | 0.136698  | 61.34 | 84.14 | 23.46 | 3HMC | CLA | 612 |
| H | 0.009074  | 61.44 | 86.47 | 20.89 | 1HAC | CLA | 612 |
| H | -0.024413 | 62.23 | 87.90 | 20.81 | 2HAC | CLA | 612 |
| H | 0.052560  | 62.63 | 86.62 | 18.86 | 1HBC | CLA | 612 |
| H | 0.044387  | 64.02 | 86.83 | 19.68 | 2HBC | CLA | 612 |
| H | 0.073047  | 63.23 | 85.40 | 19.77 | 3HBC | CLA | 612 |
| H | 0.142395  | 66.65 | 91.75 | 20.58 | 1HMD | CLA | 612 |
| H | 0.115236  | 66.06 | 90.30 | 20.12 | 2HMD | CLA | 612 |
| H | 0.117093  | 65.07 | 91.40 | 20.82 | 3HMD | CLA | 612 |
| H | 0.223180  | 69.18 | 91.99 | 25.24 | HBD  | CLA | 612 |
| H | 0.069038  | 71.93 | 88.58 | 22.35 | 1HED | CLA | 612 |
| H | 0.040612  | 72.80 | 89.47 | 23.41 | 2HED | CLA | 612 |
| H | 0.014757  | 71.68 | 88.41 | 23.96 | 3HED | CLA | 612 |
| H | -0.053690 | 74.42 | 90.28 | 26.70 | H11  | CLA | 612 |
| H | -0.144784 | 73.17 | 89.28 | 26.42 | H12  | CLA | 612 |
| H | 0.188069  | 75.18 | 88.27 | 28.13 | H2   | CLA | 612 |
| H | 0.106586  | 75.28 | 86.31 | 24.51 | H41  | CLA | 612 |
| H | 0.094147  | 73.83 | 87.02 | 24.78 | H42  | CLA | 612 |
| H | 0.094957  | 75.11 | 87.92 | 24.33 | H43  | CLA | 612 |
| H | 0.038652  | 77.00 | 86.60 | 27.14 | H51  | CLA | 612 |
| H | 0.059370  | 76.31 | 85.58 | 26.07 | H52  | CLA | 612 |
| H | -0.042159 | 75.06 | 85.92 | 28.60 | H61  | CLA | 612 |
| H | -0.005755 | 76.39 | 84.97 | 28.51 | H62  | CLA | 612 |
| H | 0.032207  | 75.32 | 83.36 | 27.53 | H71  | CLA | 612 |
| H | 0.054059  | 74.46 | 84.38 | 26.59 | H72  | CLA | 612 |
| H | -0.085571 | 72.94 | 84.66 | 28.28 | H8   | CLA | 612 |
| H | 0.089407  | 72.87 | 83.18 | 30.20 | H91  | CLA | 612 |

|    |           |       |       |       |      |     |     |
|----|-----------|-------|-------|-------|------|-----|-----|
| H  | 0.074006  | 74.33 | 82.59 | 29.77 | H92  | CLA | 612 |
| H  | 0.046120  | 74.18 | 84.15 | 30.24 | H93  | CLA | 612 |
| H  | 0.033554  | 72.10 | 82.29 | 28.38 | 1H10 | CLA | 612 |
| H  | 0.045435  | 73.37 | 81.98 | 27.40 | 2H10 | CLA | 612 |
| H  | 0.023664  | 72.13 | 82.38 | 25.67 | 1H11 | CLA | 612 |
| H  | 0.003254  | 71.80 | 83.88 | 26.22 | 2H11 | CLA | 612 |
| H  | 0.002800  | 69.77 | 83.10 | 26.46 | 1H12 | CLA | 612 |
| H  | 0.044901  | 70.38 | 82.53 | 27.87 | 2H12 | CLA | 612 |
| H  | -0.075649 | 70.55 | 80.49 | 26.09 | H13  | CLA | 612 |
| H  | 0.051867  | 68.39 | 80.27 | 25.29 | 1H14 | CLA | 612 |
| H  | 0.026211  | 68.02 | 81.75 | 25.88 | 2H14 | CLA | 612 |
| H  | 0.064042  | 69.12 | 81.60 | 24.68 | 3H14 | CLA | 612 |
| H  | -0.008907 | 69.21 | 80.95 | 28.47 | 1H15 | CLA | 612 |
| H  | -0.010182 | 70.42 | 79.91 | 28.13 | 2H15 | CLA | 612 |
| H  | -0.070785 | 68.66 | 78.49 | 27.18 | 1H16 | CLA | 612 |
| H  | -0.078319 | 67.64 | 79.44 | 28.02 | 2H16 | CLA | 612 |
| H  | 0.026083  | 68.66 | 78.90 | 30.01 | 1H17 | CLA | 612 |
| H  | 0.008441  | 69.87 | 78.12 | 29.23 | 2H17 | CLA | 612 |
| H  | -0.081209 | 67.24 | 77.10 | 29.17 | H18  | CLA | 612 |
| H  | 0.106891  | 68.30 | 74.99 | 28.85 | 1H19 | CLA | 612 |
| H  | 0.093401  | 68.73 | 76.05 | 27.69 | 2H19 | CLA | 612 |
| H  | 0.097985  | 69.75 | 75.72 | 28.91 | 3H19 | CLA | 612 |
| H  | 0.101967  | 67.75 | 75.73 | 31.09 | 1H20 | CLA | 612 |
| H  | 0.077257  | 69.16 | 76.53 | 31.26 | 2H20 | CLA | 612 |
| H  | 0.093043  | 67.75 | 77.32 | 31.48 | 3H20 | CLA | 612 |
| Mg | 1.213279  | 49.28 | 83.11 | 19.77 | MG   | CLA | 613 |
| C  | -0.177595 | 47.83 | 80.64 | 17.76 | CHA  | CLA | 613 |
| C  | -0.479921 | 52.33 | 82.61 | 18.20 | CHB  | CLA | 613 |
| C  | -0.333252 | 50.50 | 85.86 | 21.38 | CHC  | CLA | 613 |
| C  | -0.466832 | 46.10 | 83.86 | 20.98 | CHD  | CLA | 613 |
| N  | -0.572095 | 50.00 | 81.77 | 18.22 | NA   | CLA | 613 |
| C  | 0.264236  | 49.23 | 80.83 | 17.53 | C1A  | CLA | 613 |
| C  | -0.113606 | 50.07 | 80.19 | 16.42 | C2A  | CLA | 613 |
| C  | 0.222243  | 51.47 | 80.74 | 16.64 | C3A  | CLA | 613 |
| C  | 0.301205  | 51.31 | 81.75 | 17.76 | C4A  | CLA | 613 |
| C  | -0.310648 | 52.42 | 79.56 | 16.90 | CMA  | CLA | 613 |
| C  | 0.139152  | 49.61 | 80.40 | 14.96 | CAA  | CLA | 613 |
| C  | -0.219597 | 49.34 | 81.77 | 14.33 | CBA  | CLA | 613 |
| C  | 0.619661  | 48.11 | 82.50 | 14.85 | CGA  | CLA | 613 |
| O  | -0.512999 | 46.97 | 82.04 | 14.69 | O1A  | CLA | 613 |
| O  | -0.548839 | 48.28 | 83.68 | 15.66 | O2A  | CLA | 613 |
| N  | -0.586561 | 51.11 | 84.01 | 19.86 | NB   | CLA | 613 |
| C  | 0.251452  | 52.24 | 83.65 | 19.15 | C1B  | CLA | 613 |
| C  | 0.147120  | 53.32 | 84.58 | 19.49 | C2B  | CLA | 613 |
| C  | -0.267082 | 52.80 | 85.49 | 20.40 | C3B  | CLA | 613 |
| C  | 0.316384  | 51.40 | 85.14 | 20.58 | C4B  | CLA | 613 |

|   |           |       |       |       |     |     |     |
|---|-----------|-------|-------|-------|-----|-----|-----|
| C | -0.305951 | 54.69 | 84.37 | 18.79 | CMB | CLA | 613 |
| C | 0.073286  | 53.59 | 86.55 | 21.03 | CAB | CLA | 613 |
| C | -0.500289 | 54.95 | 86.78 | 20.98 | CBB | CLA | 613 |
| N | -0.593622 | 48.45 | 84.55 | 21.03 | NC  | CLA | 613 |
| C | 0.085592  | 49.15 | 85.60 | 21.59 | C1C | CLA | 613 |
| C | 0.268474  | 48.26 | 86.39 | 22.43 | C2C | CLA | 613 |
| C | -0.451947 | 47.02 | 85.84 | 22.30 | C3C | CLA | 613 |
| C | 0.455664  | 47.14 | 84.69 | 21.42 | C4C | CLA | 613 |
| C | -0.457782 | 48.68 | 87.64 | 23.23 | CMC | CLA | 613 |
| C | 0.293164  | 45.73 | 86.33 | 23.02 | CAC | CLA | 613 |
| C | -0.247522 | 45.06 | 87.46 | 22.27 | CBC | CLA | 613 |
| N | -0.768997 | 47.40 | 82.41 | 19.52 | ND  | CLA | 613 |
| C | 0.368372  | 46.21 | 82.79 | 20.09 | C1D | CLA | 613 |
| C | 0.098325  | 45.13 | 81.92 | 19.64 | C2D | CLA | 613 |
| C | -0.308054 | 45.70 | 81.06 | 18.75 | C3D | CLA | 613 |
| C | 0.485045  | 47.09 | 81.38 | 18.67 | C4D | CLA | 613 |
| C | -0.312568 | 43.66 | 82.00 | 20.11 | CMD | CLA | 613 |
| C | 0.717536  | 45.49 | 79.95 | 17.84 | CAD | CLA | 613 |
| O | -0.480341 | 44.49 | 79.26 | 17.63 | OBD | CLA | 613 |
| C | -0.733916 | 46.82 | 79.71 | 17.06 | CBD | CLA | 613 |
| C | 0.798979  | 47.23 | 78.20 | 17.14 | CGD | CLA | 613 |
| O | -0.439467 | 47.64 | 77.65 | 18.16 | O1D | CLA | 613 |
| O | -0.423946 | 47.11 | 77.53 | 15.85 | O2D | CLA | 613 |
| C | 0.059234  | 47.55 | 76.24 | 15.57 | CED | CLA | 613 |
| C | 0.763545  | 47.06 | 84.35 | 16.08 | C1  | CLA | 613 |
| C | -0.609112 | 47.40 | 85.43 | 16.94 | C2  | CLA | 613 |
| C | 0.221404  | 46.61 | 86.14 | 17.85 | C3  | CLA | 613 |
| C | -0.291093 | 45.11 | 85.85 | 18.12 | C4  | CLA | 613 |
| C | -0.282276 | 47.08 | 87.32 | 18.71 | C5  | CLA | 613 |
| C | 0.265558  | 48.52 | 87.78 | 18.65 | C6  | CLA | 613 |
| C | -0.342427 | 48.73 | 88.86 | 17.61 | C7  | CLA | 613 |
| C | 0.384024  | 50.15 | 88.90 | 17.10 | C8  | CLA | 613 |
| C | -0.243224 | 51.18 | 89.35 | 18.15 | C9  | CLA | 613 |
| C | -0.120790 | 50.23 | 89.53 | 15.71 | C10 | CLA | 613 |
| C | 0.278345  | 51.59 | 89.60 | 15.04 | C11 | CLA | 613 |
| C | -0.326301 | 51.31 | 89.67 | 13.57 | C12 | CLA | 613 |
| C | 0.437179  | 52.54 | 89.76 | 12.70 | C13 | CLA | 613 |
| C | -0.344903 | 52.33 | 90.84 | 11.65 | C14 | CLA | 613 |
| C | -0.127926 | 52.76 | 88.39 | 12.08 | C15 | CLA | 613 |
| C | 0.051226  | 53.94 | 87.58 | 12.56 | C16 | CLA | 613 |
| C | -0.122781 | 54.60 | 86.90 | 11.37 | C17 | CLA | 613 |
| C | 0.382315  | 55.33 | 85.58 | 11.57 | C18 | CLA | 613 |
| C | -0.385565 | 55.50 | 84.93 | 10.20 | C19 | CLA | 613 |
| C | -0.292434 | 56.67 | 85.75 | 12.29 | C20 | CLA | 613 |
| H | 0.180036  | 53.22 | 82.48 | 17.78 | HHB | CLA | 613 |
| H | 0.169495  | 50.88 | 86.66 | 21.85 | HHC | CLA | 613 |



|   |           |       |       |       |      |     |     |
|---|-----------|-------|-------|-------|------|-----|-----|
| H | 0.207815  | 45.19 | 84.05 | 21.35 | HHD  | CLA | 613 |
| H | 0.111409  | 49.98 | 79.20 | 16.52 | H2A  | CLA | 613 |
| H | -0.013278 | 51.89 | 81.21 | 15.86 | H3A  | CLA | 613 |
| H | 0.076858  | 53.35 | 79.91 | 17.04 | 1HMA | CLA | 613 |
| H | 0.130947  | 52.12 | 79.06 | 17.71 | 2HMA | CLA | 613 |
| H | 0.084142  | 52.41 | 78.95 | 16.11 | 3HMA | CLA | 613 |
| H | -0.032786 | 48.76 | 79.88 | 14.86 | 1HAA | CLA | 613 |
| H | 0.008394  | 50.32 | 79.98 | 14.39 | 2HAA | CLA | 613 |
| H | 0.050135  | 50.13 | 82.35 | 14.49 | 1HBA | CLA | 613 |
| H | 0.102801  | 49.21 | 81.64 | 13.34 | 2HBA | CLA | 613 |
| H | 0.073494  | 55.33 | 85.07 | 19.11 | 1HMB | CLA | 613 |
| H | 0.120476  | 55.05 | 83.46 | 19.02 | 2HMB | CLA | 613 |
| H | 0.096460  | 54.58 | 84.45 | 17.80 | 3HMB | CLA | 613 |
| H | 0.073632  | 53.07 | 87.20 | 21.58 | HAB  | CLA | 613 |
| H | 0.201174  | 55.54 | 86.17 | 20.45 | 1HBB | CLA | 613 |
| H | 0.166073  | 55.35 | 87.55 | 21.48 | 2HBB | CLA | 613 |
| H | 0.127800  | 47.89 | 88.00 | 23.72 | 1HMC | CLA | 613 |
| H | 0.144638  | 49.39 | 87.39 | 23.89 | 2HMC | CLA | 613 |
| H | 0.119988  | 49.03 | 88.34 | 22.60 | 3HMC | CLA | 613 |
| H | -0.029215 | 45.09 | 85.57 | 23.08 | 1HAC | CLA | 613 |
| H | -0.023783 | 45.96 | 86.64 | 23.94 | 2HAC | CLA | 613 |
| H | 0.039264  | 44.24 | 87.75 | 22.76 | 1HBC | CLA | 613 |
| H | 0.050613  | 45.70 | 88.24 | 22.20 | 2HBC | CLA | 613 |
| H | 0.072927  | 44.82 | 87.16 | 21.35 | 3HBC | CLA | 613 |
| H | 0.124690  | 43.12 | 81.29 | 19.65 | 1HMD | CLA | 613 |
| H | 0.116571  | 43.61 | 81.86 | 21.10 | 2HMD | CLA | 613 |
| H | 0.079629  | 43.28 | 82.90 | 19.88 | 3HMD | CLA | 613 |
| H | 0.280742  | 46.76 | 79.92 | 16.09 | HBD  | CLA | 613 |
| H | 0.072136  | 47.35 | 76.02 | 14.62 | 1HED | CLA | 613 |
| H | 0.046763  | 48.54 | 76.18 | 15.73 | 2HED | CLA | 613 |
| H | 0.065345  | 47.08 | 75.59 | 16.17 | 3HED | CLA | 613 |
| H | -0.084329 | 46.47 | 83.72 | 16.57 | H11  | CLA | 613 |
| H | -0.059404 | 46.57 | 84.71 | 15.28 | H12  | CLA | 613 |
| H | 0.189414  | 48.35 | 85.74 | 16.88 | H2   | CLA | 613 |
| H | 0.083332  | 44.77 | 86.49 | 18.81 | H41  | CLA | 613 |
| H | 0.079654  | 44.59 | 85.97 | 17.27 | H42  | CLA | 613 |
| H | 0.095946  | 45.00 | 84.92 | 18.45 | H43  | CLA | 613 |
| H | 0.063640  | 46.90 | 87.08 | 19.67 | H51  | CLA | 613 |
| H | 0.083993  | 46.52 | 88.11 | 18.46 | H52  | CLA | 613 |
| H | -0.049014 | 49.10 | 87.00 | 18.43 | H61  | CLA | 613 |
| H | -0.002067 | 48.78 | 88.14 | 19.55 | H62  | CLA | 613 |
| H | 0.043358  | 48.50 | 89.75 | 18.01 | H71  | CLA | 613 |
| H | 0.062791  | 48.12 | 88.68 | 16.84 | H72  | CLA | 613 |
| H | -0.044726 | 50.45 | 87.96 | 16.95 | H8   | CLA | 613 |
| H | 0.033539  | 52.10 | 89.36 | 17.74 | H91  | CLA | 613 |
| H | 0.021789  | 50.96 | 90.28 | 18.46 | H92  | CLA | 613 |

|    |           |       |       |       |      |     |     |
|----|-----------|-------|-------|-------|------|-----|-----|
| H  | 0.033086  | 51.17 | 88.72 | 18.93 | H93  | CLA | 613 |
| H  | -0.017268 | 49.88 | 90.46 | 15.78 | 1H10 | CLA | 613 |
| H  | 0.010629  | 49.63 | 88.99 | 15.11 | 2H10 | CLA | 613 |
| H  | -0.089752 | 52.14 | 88.79 | 15.25 | 1H11 | CLA | 613 |
| H  | -0.062160 | 52.09 | 90.42 | 15.33 | 2H11 | CLA | 613 |
| H  | 0.051269  | 50.75 | 90.48 | 13.39 | 1H12 | CLA | 613 |
| H  | 0.072820  | 50.81 | 88.85 | 13.31 | 2H12 | CLA | 613 |
| H  | -0.095083 | 53.36 | 90.00 | 13.23 | H13  | CLA | 613 |
| H  | 0.067007  | 53.14 | 90.91 | 11.07 | 1H14 | CLA | 613 |
| H  | 0.065591  | 51.53 | 90.61 | 11.09 | 2H14 | CLA | 613 |
| H  | 0.065917  | 52.17 | 91.72 | 12.11 | 3H14 | CLA | 613 |
| H  | 0.007858  | 52.87 | 88.53 | 11.09 | 1H15 | CLA | 613 |
| H  | 0.027353  | 51.93 | 87.86 | 12.25 | 2H15 | CLA | 613 |
| H  | 0.002917  | 53.62 | 86.88 | 13.21 | 1H16 | CLA | 613 |
| H  | -0.015088 | 54.60 | 88.18 | 13.01 | 2H16 | CLA | 613 |
| H  | 0.024234  | 55.26 | 87.55 | 11.00 | 1H17 | CLA | 613 |
| H  | 0.010839  | 53.88 | 86.74 | 10.69 | 2H17 | CLA | 613 |
| H  | -0.060905 | 54.78 | 84.99 | 12.16 | H18  | CLA | 613 |
| H  | 0.091646  | 55.98 | 84.06 | 10.30 | 1H19 | CLA | 613 |
| H  | 0.084068  | 54.60 | 84.77 | 9.79  | 2H19 | CLA | 613 |
| H  | 0.078707  | 56.04 | 85.53 | 9.61  | 3H19 | CLA | 613 |
| H  | 0.071070  | 57.11 | 84.86 | 12.40 | 1H20 | CLA | 613 |
| H  | 0.059264  | 57.26 | 86.35 | 11.75 | 2H20 | CLA | 613 |
| H  | 0.042943  | 56.51 | 86.16 | 13.19 | 3H20 | CLA | 613 |
| Mg | 1.140797  | 52.89 | 82.46 | 11.22 | MG   | CLA | 614 |
| C  | 0.073563  | 50.27 | 84.79 | 11.44 | CHA  | CLA | 614 |
| C  | -0.530666 | 52.49 | 82.46 | 7.76  | CHB  | CLA | 614 |
| C  | -0.293706 | 55.93 | 80.88 | 10.88 | CHC  | CLA | 614 |
| C  | -0.381654 | 53.68 | 83.19 | 14.53 | CHD  | CLA | 614 |
| N  | -0.401782 | 51.46 | 83.33 | 9.82  | NA   | CLA | 614 |
| C  | -0.027935 | 50.48 | 84.27 | 10.13 | C1A  | CLA | 614 |
| C  | -0.100818 | 49.74 | 84.67 | 8.85  | C2A  | CLA | 614 |
| C  | 0.259931  | 50.22 | 83.67 | 7.83  | C3A  | CLA | 614 |
| C  | 0.273045  | 51.48 | 83.10 | 8.46  | C4A  | CLA | 614 |
| C  | -0.347802 | 49.15 | 82.61 | 7.57  | CMA  | CLA | 614 |
| C  | -0.066561 | 49.98 | 86.13 | 8.37  | CAA  | CLA | 614 |
| C  | -0.370595 | 51.35 | 86.65 | 7.89  | CBA  | CLA | 614 |
| C  | 0.722546  | 51.77 | 88.09 | 8.08  | CGA  | CLA | 614 |
| O  | -0.577588 | 50.94 | 89.00 | 8.08  | O1A  | CLA | 614 |
| O  | -0.390978 | 53.16 | 88.42 | 8.30  | O2A  | CLA | 614 |
| N  | -0.522883 | 54.01 | 81.79 | 9.62  | NB   | CLA | 614 |
| C  | 0.290613  | 53.66 | 81.88 | 8.28  | C1B  | CLA | 614 |
| C  | 0.056235  | 54.69 | 81.25 | 7.49  | C2B  | CLA | 614 |
| C  | -0.059508 | 55.62 | 80.74 | 8.34  | C3B  | CLA | 614 |
| C  | 0.201631  | 55.21 | 81.11 | 9.70  | C4B  | CLA | 614 |
| C  | -0.196671 | 54.59 | 81.19 | 5.94  | CMB  | CLA | 614 |

|   |           |       |       |       |      |     |     |
|---|-----------|-------|-------|-------|------|-----|-----|
| C | -0.082924 | 56.70 | 79.97 | 7.70  | CAB  | CLA | 614 |
| C | -0.377552 | 57.70 | 79.32 | 8.35  | CBB  | CLA | 614 |
| N | -0.500171 | 54.45 | 81.99 | 12.53 | NC   | CLA | 614 |
| C | 0.173876  | 55.59 | 81.28 | 12.19 | C1C  | CLA | 614 |
| C | 0.126254  | 56.43 | 81.14 | 13.37 | C2C  | CLA | 614 |
| C | -0.311689 | 55.80 | 81.77 | 14.39 | C3C  | CLA | 614 |
| C | 0.313793  | 54.59 | 82.37 | 13.85 | C4C  | CLA | 614 |
| C | -0.242247 | 57.84 | 80.53 | 13.42 | CMC  | CLA | 614 |
| C | 0.190617  | 56.28 | 81.84 | 15.87 | CAC  | CLA | 614 |
| C | -0.128605 | 57.11 | 83.07 | 16.24 | CBC  | CLA | 614 |
| N | -0.496512 | 52.05 | 83.51 | 12.74 | ND   | CLA | 614 |
| C | 0.199807  | 52.50 | 83.75 | 14.02 | C1D  | CLA | 614 |
| C | 0.067465  | 51.70 | 84.80 | 14.65 | C2D  | CLA | 614 |
| C | -0.256041 | 50.76 | 85.15 | 13.74 | C3D  | CLA | 614 |
| C | 0.145335  | 51.04 | 84.42 | 12.54 | C4D  | CLA | 614 |
| C | -0.257732 | 51.93 | 85.44 | 16.02 | CMD  | CLA | 614 |
| C | 0.711103  | 49.60 | 85.97 | 13.47 | CAD  | CLA | 614 |
| O | -0.574720 | 48.89 | 86.66 | 14.21 | OBD  | CLA | 614 |
| C | -0.635795 | 49.30 | 85.87 | 11.95 | CBD  | CLA | 614 |
| C | 0.907866  | 47.80 | 85.48 | 11.72 | CGD  | CLA | 614 |
| O | -0.603021 | 47.24 | 86.15 | 10.85 | O1D  | CLA | 614 |
| O | -0.381813 | 47.15 | 84.46 | 12.49 | O2D  | CLA | 614 |
| C | 0.011315  | 45.75 | 84.39 | 12.55 | CED  | CLA | 614 |
| C | 0.183261  | 53.72 | 89.50 | 7.50  | C1   | CLA | 614 |
| C | -0.404524 | 54.94 | 89.98 | 8.16  | C2   | CLA | 614 |
| C | 0.231494  | 56.09 | 90.61 | 7.67  | C3   | CLA | 614 |
| C | -0.171786 | 56.34 | 90.97 | 6.18  | C4   | CLA | 614 |
| H | 0.181940  | 52.38 | 82.41 | 6.77  | HHB  | CLA | 614 |
| H | 0.147981  | 56.78 | 80.36 | 10.79 | HHC  | CLA | 614 |
| H | 0.220211  | 53.91 | 83.41 | 15.48 | HHD  | CLA | 614 |
| H | 0.118910  | 48.75 | 84.63 | 9.01  | H2A  | CLA | 614 |
| H | 0.009865  | 50.41 | 84.08 | 6.94  | H3A  | CLA | 614 |
| H | 0.088879  | 49.48 | 81.96 | 6.89  | 1HMA | CLA | 614 |
| H | 0.088879  | 48.94 | 82.13 | 8.42  | 2HMA | CLA | 614 |
| H | 0.088879  | 48.32 | 83.05 | 7.22  | 3HMA | CLA | 614 |
| H | 0.074129  | 49.72 | 86.72 | 9.13  | 1HAA | CLA | 614 |
| H | 0.074129  | 49.35 | 86.28 | 7.60  | 2HAA | CLA | 614 |
| H | 0.123685  | 52.04 | 86.09 | 8.35  | 1HBA | CLA | 614 |
| H | 0.123685  | 51.39 | 86.48 | 6.90  | 2HBA | CLA | 614 |
| H | 0.069103  | 55.40 | 80.72 | 5.58  | 1HMB | CLA | 614 |
| H | 0.069103  | 53.77 | 80.69 | 5.68  | 2HMB | CLA | 614 |
| H | 0.069103  | 54.55 | 82.12 | 5.57  | 3HMB | CLA | 614 |
| H | 0.130228  | 56.69 | 79.92 | 6.70  | HAB  | CLA | 614 |
| H | 0.160920  | 57.75 | 79.34 | 9.35  | 1HBB | CLA | 614 |
| H | 0.160920  | 58.40 | 78.82 | 7.83  | 2HBB | CLA | 614 |
| H | 0.079840  | 58.18 | 80.56 | 14.36 | 1HMC | CLA | 614 |

|   |           |       |       |       |      |     |      |
|---|-----------|-------|-------|-------|------|-----|------|
| H | 0.079840  | 57.81 | 79.57 | 13.12 | 2HMC | CLA | 614  |
| H | 0.079840  | 58.46 | 81.04 | 12.83 | 3HMC | CLA | 614  |
| H | -0.010598 | 55.48 | 81.82 | 16.46 | 1HAC | CLA | 614  |
| H | -0.010598 | 56.85 | 81.03 | 16.04 | 2HAC | CLA | 614  |
| H | 0.029396  | 57.37 | 83.01 | 17.21 | 1HBC | CLA | 614  |
| H | 0.029396  | 57.94 | 83.10 | 15.68 | 2HBC | CLA | 614  |
| H | 0.029396  | 56.57 | 83.89 | 16.09 | 3HBC | CLA | 614  |
| H | 0.084447  | 51.23 | 86.13 | 16.19 | 1HMD | CLA | 614  |
| H | 0.084447  | 51.89 | 84.73 | 16.73 | 2HMD | CLA | 614  |
| H | 0.084447  | 52.83 | 85.87 | 16.04 | 3HMD | CLA | 614  |
| H | 0.195581  | 49.44 | 86.72 | 11.45 | HBD  | CLA | 614  |
| H | 0.069208  | 45.48 | 83.62 | 13.13 | 1HED | CLA | 614  |
| H | 0.069208  | 45.39 | 85.24 | 12.93 | 2HED | CLA | 614  |
| H | 0.069208  | 45.39 | 84.26 | 11.63 | 3HED | CLA | 614  |
| H | 0.067685  | 53.05 | 90.24 | 7.43  | H11  | CLA | 614  |
| H | 0.067685  | 53.94 | 89.16 | 6.59  | H12  | CLA | 614  |
| H | 0.189077  | 54.95 | 89.83 | 9.15  | H2   | CLA | 614  |
| H | 0.059658  | 57.23 | 91.41 | 6.09  | H41  | CLA | 614  |
| H | 0.059658  | 56.32 | 90.13 | 5.63  | H42  | CLA | 614  |
| H | 0.059658  | 55.62 | 91.59 | 5.87  | H43  | CLA | 614  |
| H | 0.067685  | 56.12 | 91.45 | 8.21  | H31  | CLA | 614  |
| H | 0.067685  | 56.81 | 89.99 | 7.97  | H32  | CLA | 614  |
| C | -0.022500 | 40.36 | 74.66 | 40.84 | C1   | XAT | 6622 |
| C | 0.009700  | 40.08 | 74.64 | 39.32 | C2   | XAT | 6622 |
| C | 0.255200  | 41.19 | 75.02 | 38.33 | C3   | XAT | 6622 |
| C | -0.020800 | 42.53 | 74.32 | 38.62 | C4   | XAT | 6622 |
| C | 0.167100  | 42.94 | 74.44 | 40.06 | C5   | XAT | 6622 |
| C | 0.204000  | 41.91 | 74.61 | 41.18 | C6   | XAT | 6622 |
| C | -0.162900 | 42.27 | 74.28 | 42.60 | C7   | XAT | 6622 |
| C | -0.112500 | 42.89 | 75.15 | 43.41 | C8   | XAT | 6622 |
| C | -0.076400 | 43.26 | 75.01 | 44.81 | C9   | XAT | 6622 |
| C | -0.125000 | 43.86 | 76.07 | 45.41 | C10  | XAT | 6622 |
| C | -0.127000 | 44.22 | 76.15 | 46.80 | C11  | XAT | 6622 |
| C | -0.122500 | 44.85 | 77.17 | 47.41 | C12  | XAT | 6622 |
| C | -0.070900 | 45.08 | 77.25 | 48.87 | C13  | XAT | 6622 |
| C | -0.128500 | 45.77 | 78.31 | 49.35 | C14  | XAT | 6622 |
| C | -0.123000 | 46.08 | 78.58 | 50.73 | C15  | XAT | 6622 |
| C | 0.031300  | 39.62 | 73.48 | 41.47 | C16  | XAT | 6622 |
| C | 0.031300  | 39.76 | 75.96 | 41.38 | C17  | XAT | 6622 |
| C | 0.031800  | 44.33 | 73.94 | 40.34 | C18  | XAT | 6622 |
| C | 0.059700  | 42.93 | 73.72 | 45.50 | C19  | XAT | 6622 |
| C | 0.059200  | 44.52 | 76.15 | 49.73 | C20  | XAT | 6622 |
| O | -0.870600 | 40.78 | 74.73 | 37.00 | O3   | XAT | 6622 |
| O | -0.548200 | 42.65 | 75.73 | 40.63 | O4   | XAT | 6622 |
| C | -0.022500 | 47.28 | 84.94 | 61.68 | C21  | XAT | 6622 |
| C | 0.009700  | 47.27 | 85.05 | 63.22 | C22  | XAT | 6622 |

|   |           |       |       |       |      |     |      |
|---|-----------|-------|-------|-------|------|-----|------|
| C | 0.255200  | 48.57 | 85.46 | 63.91 | C23  | XAT | 6622 |
| C | -0.020800 | 49.92 | 84.95 | 63.39 | C24  | XAT | 6622 |
| C | 0.167100  | 49.90 | 84.39 | 61.98 | C25  | XAT | 6622 |
| C | 0.204000  | 48.64 | 84.37 | 61.12 | C26  | XAT | 6622 |
| C | -0.162900 | 48.79 | 84.34 | 59.62 | C27  | XAT | 6622 |
| C | -0.112500 | 48.43 | 83.33 | 58.78 | C28  | XAT | 6622 |
| C | -0.076400 | 48.64 | 83.32 | 57.32 | C29  | XAT | 6622 |
| C | -0.125000 | 48.19 | 82.28 | 56.59 | C30  | XAT | 6622 |
| C | -0.127000 | 48.28 | 82.15 | 55.15 | C31  | XAT | 6622 |
| C | -0.122500 | 47.73 | 81.13 | 54.48 | C32  | XAT | 6622 |
| C | -0.070900 | 47.72 | 80.96 | 53.02 | C33  | XAT | 6622 |
| C | -0.128500 | 47.02 | 79.92 | 52.51 | C34  | XAT | 6622 |
| C | -0.123000 | 46.80 | 79.63 | 51.12 | C35  | XAT | 6622 |
| C | 0.031300  | 47.00 | 86.32 | 61.09 | C36  | XAT | 6622 |
| C | 0.031300  | 46.13 | 83.98 | 61.37 | C37  | XAT | 6622 |
| C | 0.031800  | 51.28 | 84.35 | 61.38 | C38  | XAT | 6622 |
| C | 0.059700  | 49.32 | 84.51 | 56.72 | C39  | XAT | 6622 |
| C | 0.059200  | 48.42 | 82.00 | 52.19 | C40  | XAT | 6622 |
| O | -0.870600 | 48.63 | 86.87 | 64.03 | O23  | XAT | 6622 |
| O | -0.548200 | 49.11 | 83.18 | 61.81 | O24  | XAT | 6622 |
| H | 0.019650  | 39.80 | 73.71 | 39.09 | H21  | XAT | 6622 |
| H | 0.019650  | 39.32 | 75.27 | 39.15 | H22  | XAT | 6622 |
| H | 0.000900  | 41.32 | 76.01 | 38.37 | H3   | XAT | 6622 |
| H | 0.020400  | 42.44 | 73.35 | 38.40 | H41  | XAT | 6622 |
| H | 0.020400  | 43.24 | 74.73 | 38.06 | H42  | XAT | 6622 |
| H | 0.136000  | 42.03 | 73.38 | 42.95 | H7   | XAT | 6622 |
| H | 0.140000  | 43.14 | 76.02 | 42.99 | H8   | XAT | 6622 |
| H | 0.124500  | 44.07 | 76.86 | 44.84 | H10  | XAT | 6622 |
| H | 0.127000  | 43.96 | 75.37 | 47.37 | H11  | XAT | 6622 |
| H | 0.123000  | 45.19 | 77.92 | 46.84 | H12  | XAT | 6622 |
| H | 0.122000  | 46.10 | 78.97 | 48.67 | H14  | XAT | 6622 |
| H | 0.125000  | 45.73 | 77.96 | 51.43 | H15  | XAT | 6622 |
| H | 0.002317  | 39.78 | 73.47 | 42.45 | 1H16 | XAT | 6622 |
| H | 0.002317  | 38.64 | 73.57 | 41.29 | 2H16 | XAT | 6622 |
| H | 0.002317  | 39.96 | 72.63 | 41.07 | 3H16 | XAT | 6622 |
| H | 0.002317  | 38.87 | 76.36 | 41.59 | 1H17 | XAT | 6622 |
| H | 0.002317  | 40.43 | 76.28 | 42.06 | 2H17 | XAT | 6622 |
| H | 0.002317  | 40.05 | 76.25 | 40.47 | 3H17 | XAT | 6622 |
| H | 0.011900  | 44.54 | 74.05 | 41.31 | 1H18 | XAT | 6622 |
| H | 0.011900  | 44.40 | 72.98 | 40.09 | 2H18 | XAT | 6622 |
| H | 0.011900  | 44.99 | 74.48 | 39.80 | 3H18 | XAT | 6622 |
| H | 0.005233  | 42.49 | 73.10 | 44.85 | 1H19 | XAT | 6622 |
| H | 0.005233  | 43.76 | 73.30 | 45.85 | 2H19 | XAT | 6622 |
| H | 0.005233  | 42.30 | 73.90 | 46.26 | 3H19 | XAT | 6622 |
| H | 0.006067  | 44.06 | 75.48 | 49.15 | 1H20 | XAT | 6622 |
| H | 0.006067  | 45.27 | 75.70 | 50.22 | 2H20 | XAT | 6622 |

|   |          |       |       |       |      |     |      |
|---|----------|-------|-------|-------|------|-----|------|
| H | 0.006067 | 43.88 | 76.53 | 50.38 | 3H20 | XAT | 6622 |
| H | 0.599000 | 41.51 | 74.99 | 36.37 | HO3  | XAT | 6622 |
| H | 0.019650 | 47.01 | 84.16 | 63.58 | 1H22 | XAT | 6622 |
| H | 0.019650 | 46.58 | 85.73 | 63.47 | 2H22 | XAT | 6622 |
| H | 0.000900 | 48.48 | 85.05 | 64.82 | H23  | XAT | 6622 |
| H | 0.020400 | 50.24 | 84.22 | 64.00 | 1H24 | XAT | 6622 |
| H | 0.020400 | 50.57 | 85.71 | 63.40 | 2H24 | XAT | 6622 |
| H | 0.136000 | 49.20 | 85.14 | 59.20 | H27  | XAT | 6622 |
| H | 0.140000 | 47.98 | 82.53 | 59.18 | H28  | XAT | 6622 |
| H | 0.124500 | 47.75 | 81.53 | 57.08 | H30  | XAT | 6622 |
| H | 0.127000 | 48.78 | 82.85 | 54.64 | H31  | XAT | 6622 |
| H | 0.123000 | 47.28 | 80.42 | 55.02 | H32  | XAT | 6622 |
| H | 0.122000 | 46.62 | 79.28 | 53.17 | H34  | XAT | 6622 |
| H | 0.125000 | 47.20 | 80.14 | 50.36 | H35  | XAT | 6622 |
| H | 0.002317 | 47.00 | 86.27 | 60.09 | 1H36 | XAT | 6622 |
| H | 0.002317 | 46.10 | 86.64 | 61.41 | 2H36 | XAT | 6622 |
| H | 0.002317 | 47.70 | 86.96 | 61.39 | 3H36 | XAT | 6622 |
| H | 0.002317 | 45.88 | 83.83 | 62.32 | 1H37 | XAT | 6622 |
| H | 0.002317 | 45.33 | 83.85 | 60.79 | 2H37 | XAT | 6622 |
| H | 0.002317 | 46.85 | 83.33 | 61.11 | 3H37 | XAT | 6622 |
| H | 0.011900 | 51.23 | 83.98 | 60.46 | 1H38 | XAT | 6622 |
| H | 0.011900 | 51.66 | 85.28 | 61.35 | 2H38 | XAT | 6622 |
| H | 0.011900 | 51.87 | 83.77 | 61.95 | 3H38 | XAT | 6622 |
| H | 0.005233 | 49.40 | 84.38 | 55.73 | 1H39 | XAT | 6622 |
| H | 0.005233 | 48.77 | 85.33 | 56.91 | 2H39 | XAT | 6622 |
| H | 0.005233 | 50.23 | 84.61 | 57.13 | 3H39 | XAT | 6622 |
| H | 0.006067 | 48.86 | 82.67 | 52.79 | 1H40 | XAT | 6622 |
| H | 0.006067 | 49.11 | 81.56 | 51.61 | 2H40 | XAT | 6622 |
| H | 0.006067 | 47.75 | 82.47 | 51.61 | 3H40 | XAT | 6622 |
| H | 0.599000 | 49.48 | 87.13 | 64.48 | 2H23 | XAT | 6622 |
